# Supplementary material for: Salicylic Acid Induction of Flavonoid Biosynthesis Pathways in Wheat Varies by Treatment
Source: Front Plant Sci. 2016 Sep 28;7:1447. doi: 10.3389/fpls.2016.01447 (PMC5039175; doi:10.3389/fpls.2016.01447)
Supplement: Supplementary file 2 [file Table_2.XLSX]

## Sheet: Legend
Table S2. Microarray data.

## Sheet: ctrl vs sh 2xfold anova benj co
ProbeName		Corrected p-value	p-value	Fold change([ctrl] vs [sh])	Log Fold change([ctrl] vs [sh])	Absolute Fold change([ctrl] vs [sh])	GeneSymbol	Description
A_99_P105360		0.0123357	0.000649269	-2410.17	-11.2349	2410.17	LOC100192198	Triticum aestivum flavanone 3-dioxygenase mRNA, complete cds [EU977177]	dbj|BAH36892,1| flavanone 3-hydroxylase [Triticum aestivum]
A_99_P353956		0.0124036	0.000687397	-2130.68	-11.0571	2130.68	LOC100192198	Triticum aestivum flavanone 3-dioxygenase mRNA, complete cds [EU977177]	gb|ACJ06501,1| flavanone 3-hydroxylase [Secale cereale]
A_99_P616348		0.0457401	0.0194435	-392.235	-8.61557	392.235	gstf4	Triticum aestivum clone wr1,pk0088,e4:fis, full insert mRNA sequence [BT009505]	emb|CAD29477,1| glutathione transferase F4 [Triticum aestivum]
A_99_P612547		0.0462788	0.0198357	-299.656	-8.22716	299.656	gstf4	Triticum aestivum clone wr1,pk0088,e4:fis, full insert mRNA sequence [BT009505]	emb|CAD29477,1| glutathione transferase F4 [Triticum aestivum]
A_99_P199036		0.00910672	0.000299175	-292.638	-8.19297	292.638		Triticum aestivum clone wdk1c,pk014,c11:fis, full insert mRNA sequence [BT008969]	ref|XP_003546810,1| PREDICTED: thiosulfate/3-mercaptopyruvate sulfurtransferase 1, mitochondrial-like [Glycine max]
A_99_P560262		0.00880151	0.000252507	-290.112	-8.18047	290.112			gb|EMT09010,1| 6(G)-fructosyltransferase [Aegilops tauschii]
A_99_P393122		0.0207145	0.00409341	-280.727	-8.13303	280.727		Rep: Glutathione-S-transferase Cla47 - Triticum aestivum (Wheat), partial (96%) [TC412532]	N/A
A_99_P133905		0.00880151	0.000222822	-265.443	-8.05226	265.443	6-SFT	Triticum aestivum 6-SFT mRNA for sucrose:fructan 6-fructosyltransferase, complete cds [AB029887]	pir||JC7905 fructan 6-fructosyltransferase - wheat
A_99_P076280		0.00952029	0.000323402	-140.305	-7.13242	140.305		FGAS083553 Triticum aestivum FGAS: Library 6 CAP GATE 1 Triticum aestivum cDNA, mRNA sequence [DR738336]	dbj|BAJ98765,1| predicted protein [Hordeum vulgare subsp, vulgare]
A_99_P526832		0.00880151	0.000197857	-96.3844	-6.59073	96.3844		Rep: Cytochrome P450 - Triticum monococcum subsp, aegilopoides, partial (14%) [TC442914]	ref|XP_006284996,1| hypothetical protein CARUB_v10006303mg [Capsella rubella] gb|EOA17894,1| hypothetical protein CARUB_v10006303mg [Capsella rubella]
A_99_P641396		0.0126712	0.000789076	-91.6284	-6.51772	91.6284	NAC69-3	Triticum aestivum NAC domain transcription factor (NAC69-3) mRNA, complete cds [DQ022843]	gb|EMS64642,1| hypothetical protein TRIUR3_15051 [Triticum urartu]
A_99_P503042		0.0208849	0.00416867	-91.0242	-6.50818	91.0242	1-FFT-B	Triticum aestivum 1-FFT-B mRNA for fructan:fructan 1-fructosyltransferase, complete cds [AB088410]	gb|EMS52931,1| 6(G)-fructosyltransferase [Triticum urartu]
A_99_P141418		0.00880151	0.000180031	-67.9838	-6.08712	67.9838		CJ859149 Y, Ogihara unpublished cDNA library, whsctal Triticum aestivum cDNA clone whsctal7k13 5', mRNA sequence [CJ859149]	ref|XP_004492420,1| PREDICTED: pentatricopeptide repeat-containing protein At4g28010-like [Cicer arietinum]
A_99_P139740		0.0166121	0.00259131	-61.0237	-5.9313	61.0237	1-SST	Triticum aestivum cDNA, clone: WT005_F18, cultivar: Chinese Spring [AK332983]	gb|ACL13556,1| sucrose:sucrose 1-fructosyltransferase [Triticum urartu]
A_99_P205151		0.0176049	0.00290932	-58.7753	-5.87714	58.7753	1-SST	Triticum aestivum cDNA, clone: WT005_F18, cultivar: Chinese Spring [AK332983]	gb|ACL13556,1| sucrose:sucrose 1-fructosyltransferase [Triticum urartu]
A_99_P056351		0.0127836	0.000950804	-56.2449	-5.81365	56.2449	taxi-I	Triticum aestivum taxi-I mRNA for xylanase inhibitor TAXI-I, complete cds [AB114626]	pdb|2B42|A Chain A, Crystal Structure Of The Triticum Xylanse Inhibitor-I In Complex With Bacillus Subtilis Xylanase
A_99_P199001		0.0164557	0.00239996	-51.422	-5.68431	51.422	1-SST	Triticum aestivum cDNA, clone: WT005_F18, cultivar: Chinese Spring [AK332983]	gb|EMS55535,1| Beta-fructofuranosidase 1 [Triticum urartu]
A_99_P413662		0.00523595	1.13955e-05	-47.5593	-5.57166	47.5593		Rep: Chromosome chr8 scaffold_88, whole genome shotgun sequence - Vitis vinifera (Grape), partial (57%) [TC385526]	gb|EMT26999,1| Alanine--glyoxylate aminotransferase-2-like protein, mitochondrial [Aegilops tauschii]
A_99_P025909		0.0150284	0.00145123	-44.0227	-5.46018	44.0227	DFR	Triticum aestivum dihydroflavonol 4-reductase 1 mRNA, complete cds [AY707916]	dbj|BAD11019,1| dihydroflavonol-4-reductase [Triticum aestivum]
A_99_P244506		0.0137036	0.0012187	-42.9547	-5.42474	42.9547		Rep: Endonuclease - Hordeum vulgare (Barley), partial (66%) [TC376365]	###############################################################################################################################################################################################################################################################
A_99_P288411		0.0252591	0.00647076	-40.805	-5.35067	40.805		Rep: Eukaryotic peptide chain release factor subunit 1-3-like - Solanum tuberosum (Potato), partial (12%) [TC401495]	ref|XP_004290750,1| PREDICTED: pentatricopeptide repeat-containing protein At4g35130, chloroplastic-like [Fragaria vesca subsp, vesca]
A_99_P086245		0.0309593	0.00984568	-39.9764	-5.32108	39.9764	1-FFT-A	Triticum aestivum 1-FFT-A mRNA for fructan:fructan 1-fructosyltransferase, complete cds [AB088409]	gb|EMS61371,1| Acid beta-fructofuranosidase [Triticum urartu]
A_99_P009801		0.02219	0.00482704	-38.9331	-5.28292	38.9331		EST162 Genes amplified from wheat FGAS cDNA libraries Triticum aestivum cDNA clone C65R1L1-81, mRNA sequence [DY761266]	dbj|BAJ92553,1| predicted protein [Hordeum vulgare subsp, vulgare]
A_99_P198216		0.0159307	0.00218665	-37.7968	-5.24019	37.7968	1-SST	Triticum aestivum cDNA, clone: WT005_F18, cultivar: Chinese Spring [AK332983]	N/A
A_99_P131050		0.0297837	0.00913229	-37.3553	-5.22324	37.3553		Rep: Os09g0378700 protein - Oryza sativa subsp, japonica (Rice), partial (6%) [TC421747]	dbj|BAJ94952,1| predicted protein [Hordeum vulgare subsp, vulgare]
A_99_P413587		0.0343522	0.0123203	-36.5526	-5.1919	36.5526		Rep: Fructan:fructan 1-fructosyltransferase - Triticum aestivum (Wheat), partial (38%) [TC375356]	gb|ACH73190,1| fructan:fructan 1-fructosyltransferase [Triticum turgidum subsp, durum]
A_99_P188177		0.0331309	0.0114301	-34.0436	-5.08931	34.0436	1-FFT-B	Triticum aestivum 1-FFT-B mRNA for fructan:fructan 1-fructosyltransferase, complete cds [AB088410]	gb|EMS52931,1| 6(G)-fructosyltransferase [Triticum urartu]
A_99_P355871		0.00523595	2.06007e-05	-31.6603	-4.9846	31.6603		Rep: Expressed protein - Oryza sativa subsp, japonica (Rice), partial (57%) [TC405377]	gb|ABB77434,1| S-RNase-binding protein [Petunia integrifolia subsp, inflata]
A_99_P547117		0.017709	0.00296179	-31.2018	-4.96356	31.2018		CJ854030 Y, Ogihara unpublished cDNA library, whsctal Triticum aestivum cDNA clone whsctal2o09 5', mRNA sequence [CJ854030]	gb|EMT16665,1| Putative UDP-glucosyltransferase [Aegilops tauschii]
A_99_P088835		0.00880151	9.40131e-05	-26.5912	-4.73288	26.5912		FGAS083226 Triticum aestivum FGAS: Library 6 CAP GATE 1 Triticum aestivum cDNA, mRNA sequence [DR738009]	###############################################################################################################################################################################################################################################################
A_99_P324301		0.0212512	0.00430882	-25.1274	-4.65119	25.1274			gb|EMT27806,1| Cytochrome P450 94A1 [Aegilops tauschii]
A_99_P005936		0.0271832	0.00746895	-24.0731	-4.58935	24.0731		BJ222628 Y, Ogihara unpublished cDNA library, Wh_dL Triticum aestivum cDNA clone whdl14m17 5', mRNA sequence [BJ222628]	gb|EMS52732,1| putative sulfate transporter 3,4 [Triticum urartu]
A_99_P438517		0.0449351	0.0189	-22.7424	-4.50731	22.7424		Rep: Glutathione S-transferase GST 34 - Zea mays (Maize), partial (83%) [TC395192]	gb|EMT24434,1| hypothetical protein F775_32163 [Aegilops tauschii]
A_99_P318361		0.0135537	0.00116714	-22.357	-4.48266	22.357		Rep: Chromosome chr18 scaffold_1, whole genome shotgun sequence - Vitis vinifera (Grape), partial (33%) [TC380834]	gb|EMS56187,1| hypothetical protein TRIUR3_02696 [Triticum urartu]
A_99_P528097		0.0275203	0.00768487	-22.02	-4.46074	22.02		FGAS010248 Triticum aestivum FGAS: Library 3 Gate 6 Triticum aestivum cDNA, mRNA sequence [CK201728]	gb|AFK29572,1| sucrose: sucrose-1-fructosyltransferase [Secale cereale]
A_99_P517257		0.0128526	0.0010108	-21.7234	-4.44118	21.7234			gb|EMT31223,1| Protein kinase and PP2C-like domain-containing protein [Aegilops tauschii]
A_99_P244541		0.00880151	0.000259062	-21.4956	-4.42597	21.4956		Rep: Endonuclease - Hordeum vulgare (Barley), complete [TC392981]	dbj|BAA28942,1| endonuclease [Hordeum vulgare subsp, vulgare]
A_99_P498457		0.0151968	0.00169699	-20.494	-4.35713	20.494		Triticum aestivum cDNA, clone: WT006_P14, cultivar: Chinese Spring [AK333639]	gb|EMT10118,1| NAD(P)H-dependent 6'-deoxychalcone synthase [Aegilops tauschii]
A_99_P344156		0.0168988	0.00273655	-20.2366	-4.33889	20.2366		Rep: Os09g0325700 protein - Oryza sativa subsp, japonica (Rice), partial (37%) [TC425151]	gb|EMT31026,1| hypothetical protein F775_42340 [Aegilops tauschii]
A_99_P256776		0.0151091	0.001607	-19.6253	-4.29465	19.6253		Triticum aestivum cDNA, clone: WT006_P14, cultivar: Chinese Spring [AK333639]	ref|XP_002450281,1| hypothetical protein SORBIDRAFT_05g003140 [Sorghum bicolor] gb|EES09269,1| hypothetical protein SORBIDRAFT_05g003140 [Sorghum bicolor]
A_99_P500287		0.0127836	0.000963819	-18.7633	-4.22984	18.7633			ref|XP_004146678,1| PREDICTED: APO protein 2, chloroplastic-like [Cucumis sativus] ref|XP_004161867,1| PREDICTED: APO protein 2, chloroplastic-like [Cucumis sativus]
A_99_P203391		0.0151091	0.00150932	-18.6792	-4.22336	18.6792			gb|ABC69389,1| CYP72A52v1 [Nicotiana tabacum]
A_99_P197481		0.0107156	0.000397885	-18.447	-4.20531	18.447		Rep: Basic blue copper protein - Cicer arietinum (Chickpea) (Garbanzo), partial (50%) [TC433879]	N/A
A_99_P302616		0.0125509	0.000762177	-17.8777	-4.16009	17.8777		Rep: AT5g59220/mnc17_110 - Arabidopsis thaliana (Mouse-ear cress), partial (28%) [TC398228]	gb|EMT07491,1| Putative protein phosphatase 2C 30 [Aegilops tauschii]
A_99_P329001		0.00880151	0.000136222	-17.8726	-4.15967	17.8726		Rep: myeloid/lymphoid or mixed-lineage leukemia 5 - Takifugu rubripes, partial (3%) [TC399889]	gb|EMT11544,1| hypothetical protein F775_21245 [Aegilops tauschii]
A_99_P017704		0.00880151	0.000157196	-17.6589	-4.14233	17.6589			gb|EMS65852,1| hypothetical protein TRIUR3_13481 [Triticum urartu]
A_99_P256781		0.0168797	0.00269706	-17.5634	-4.1345	17.5634		Triticum aestivum cDNA, clone: WT006_P14, cultivar: Chinese Spring [AK333639]	gb|EMT10118,1| NAD(P)H-dependent 6'-deoxychalcone synthase [Aegilops tauschii]
A_99_P234356		0.0370892	0.0141467	-17.4369	-4.12407	17.4369			###############################################################################################################################################################################################################################################################
A_99_P234306		0.0344633	0.0125373	-17.1439	-4.09962	17.1439			###############################################################################################################################################################################################################################################################
A_99_P229621		0.0150951	0.00148496	-15.8553	-3.9869	15.8553		Rep: Predicted protein - Ajellomyces capsulata (strain NAm1) (Histoplasma capsulatum), partial (6%) [TC386023]	N/A
A_99_P507512		0.0154903	0.00202741	-15.7242	-3.97492	15.7242		Rep: Ripening-related protein 3 precursor - Oryza sativa subsp, japonica (Rice), partial (33%) [TC434784]	gb|EMT07312,1| hypothetical protein F775_16823 [Aegilops tauschii]
A_99_P123865		0.0125509	0.000717559	-14.7363	-3.88131	14.7363		FGAS066313 Triticum aestivum FGAS: Library 2 Gate 3 Triticum aestivum cDNA, mRNA sequence [CV771920]	emb|CAI93180,1| glycosyltransferase [Triticum aestivum]
A_99_P352254		0.0341306	0.0120186	-14.3137	-3.83933	14.3137		Rep: ZIM motif family protein, expressed - Oryza sativa subsp, japonica (Rice), partial (39%) [TC458318]	gb|EMS64782,1| Protein TIFY 3A [Triticum urartu]
A_99_P308926		0.0127836	0.000844459	-14.115	-3.81916	14.115		Rep: FAD binding domain containing protein, expressed - Oryza sativa subsp, japonica (Rice), partial (69%) [TC378719]	gb|EMS68722,1| 3-hydroxybenzoate 6-hydroxylase 1 [Triticum urartu]
A_99_P200731		0.0135911	0.00118389	-13.9257	-3.79968	13.9257		Rep: Chemocyanin precursor - Lilium longiflorum (Trumpet lily), partial (85%) [TC406519]	gb|ADP02231,1| Cu_bind_like domain-containing protein [Aegilops tauschii] gb|EMT13062,1| Chemocyanin [Aegilops tauschii]
A_99_P189787		0.0127836	0.000917068	-13.7754	-3.78402	13.7754		Rep: Predicted protein - Chlamydomonas reinhardtii, partial (5%) [TC408721]	emb|CAI93180,1| glycosyltransferase [Triticum aestivum]
A_99_P532422		0.0154903	0.00177097	-13.571	-3.76246	13.571		FGAS081203 Triticum aestivum FGAS: Library 3 Gate 6 Triticum aestivum cDNA, mRNA sequence [DR735533]	gb|EMS59682,1| hypothetical protein TRIUR3_05528 [Triticum urartu]
A_99_P032504		0.0303216	0.00937737	-12.8118	-3.6794	12.8118		G608,107P05F010906 G608 Triticum aestivum cDNA clone G608107P05, mRNA sequence [CD918095]	gb|EMT24258,1| hypothetical protein F775_28603 [Aegilops tauschii]
A_99_P297601		0.0181639	0.00310763	-12.7848	-3.67636	12.7848			dbj|BAJ98523,1| predicted protein [Hordeum vulgare subsp, vulgare]
A_99_P175879		0.0120927	0.000615379	-12.5313	-3.64746	12.5313	LOC543445	Triticum aestivum glutathione-S-transferase 19E50 mRNA, complete cds [AY064481]	emb|CAD29479,1| glutathione transferase F6 [Triticum aestivum] emb|CAD29575,1| glutathione transferase [Triticum aestivum]
A_99_P120449		0.0225474	0.00500168	-12.2994	-3.62051	12.2994			ref|XP_004494767,1| PREDICTED: violaxanthin de-epoxidase, chloroplastic-like isoform X1 [Cicer arietinum]
A_99_P464492		0.0151091	0.00160944	-12.2583	-3.61569	12.2583		Rep: 12-oxo-phytodienoic acid reductase - Zea mays (Maize), partial (53%) [TC413124]	gb|EEC77352,1| hypothetical protein OsI_16037 [Oryza sativa Indica Group]
A_99_P186242		0.0212422	0.00429284	-12.0651	-3.59277	12.0651		Rep: Os02g0756800 protein - Oryza sativa subsp, japonica (Rice), partial (12%) [TC449174]	ref|YP_004021746,1| ribosomal protein S3 [Equisetum arvense] gb|ADA63545,1| ribosomal protein S3 (chloroplast) [Equisetum arvense] gb|AEV58377,1| ribosomal protein S3 [Equisetum arvense]
A_99_P646031		0.0164557	0.00239501	-11.7784	-3.55807	11.7784	LOC100037568	Triticum aestivum fasciclin-like protein FLA5 mRNA, complete cds [DQ872378]	ref|XP_006370341,1| hypothetical protein POPTR_0001s41810g [Populus trichocarpa] gb|ERP66910,1| hypothetical protein POPTR_0001s41810g [Populus trichocarpa]
A_99_P187102		0.0252591	0.00647508	-11.3745	-3.50774	11.3745		Rep: Os02g0756800 protein - Oryza sativa subsp, japonica (Rice), partial (12%) [TC449174]	gb|EMT27501,1| hypothetical protein F775_13138 [Aegilops tauschii]
A_99_P204936		0.0309593	0.0100258	-11.2746	-3.495	11.2746			gb|AAL47688,1| glutathione-S-transferase 19E50 [Triticum aestivum]
A_99_P162102		0.0151091	0.00160374	-11.2045	-3.48601	11.2045	cla30	Triticum aestivum mRNA for putative In2,1-like protein [Y17386]	emb|CAA76758,1| putative In2,1 protein [Triticum aestivum]
A_99_P322011		0.0113247	0.000494424	-11.1769	-3.48245	11.1769		BJ222628 Y, Ogihara unpublished cDNA library, Wh_dL Triticum aestivum cDNA clone whdl14m17 5', mRNA sequence [BJ222628]	N/A
A_99_P352861		0.0210125	0.00420458	-10.8316	-3.43717	10.8316		Rep: Os02g0756800 protein - Oryza sativa subsp, japonica (Rice), partial (31%) [TC441555]	gb|EMT27501,1| hypothetical protein F775_13138 [Aegilops tauschii]
A_99_P347256		0.0154903	0.00192892	-10.6822	-3.41714	10.6822			dbj|BAJ87317,1| predicted protein [Hordeum vulgare subsp, vulgare]
A_99_P415257		0.0117312	0.000533585	-10.0819	-3.33369	10.0819			gb|ACB88321,1| RNA polymerase C, partial (chloroplast) [Catananche caespitosa]
A_99_P032959		0.0392748	0.0153267	-9.85897	-3.30144	9.85897		Rep: Chromosome chr11 scaffold_13, whole genome shotgun sequence - Vitis vinifera (Grape), partial (87%) [TC432873]	gb|ACU43593,1| multiprotein bridging factor 1 [Triticum aestivum]
A_99_P314586		0.0126712	0.000780701	-9.68069	-3.27511	9.68069			ref|XP_006488999,1| PREDICTED: major allergen Pru ar 1-like [Citrus sinensis]
A_99_P225431		0.0134799	0.0011004	-9.51994	-3.25095	9.51994		Rep: Oxalate oxidase GF-2,8 precursor - Triticum aestivum (Wheat), partial (92%) [TC376697]	ref|XP_006593704,1| PREDICTED: floral homeotic protein APETALA 1-like [Glycine max]
A_99_P165052		0.0154903	0.00186772	-9.49135	-3.24661	9.49135	LOC543498	Triticum aestivum germin protein precursor, mRNA, complete cds [M21962]	sp|P15290,1|GER2_WHEAT RecName: Full=Oxalate oxidase GF-2,8; AltName: Full=Germin GF-2,8; Flags: Precursor gb|AAA34268,1| germin protein precursor [Triticum aestivum] gb|AAA34270,1| germin [Triticum aestivum]
A_99_P000097		0.0213423	0.00437931	-9.32691	-3.2214	9.32691	LOC542972	Triticum aestivum mRNA for sucrose synthase type 2 [AJ000153]	emb|CAA75793,1| sucrose synthase 2 [Hordeum vulgare subsp, vulgare]
A_99_P202706		0.0229841	0.00533229	-9.28134	-3.21433	9.28134		TSA: Triticum aestivum cultivar Bobwhite isotig25258,flagleaf mRNA sequence [HP634463]	gb|EMS47979,1| putative glutathione S-transferase GSTF1 [Triticum urartu]
A_99_P416087		0.0149098	0.00142493	-9.04237	-3.1767	9.04237		Rep: Gibberellin 2-oxidase - Lolium temulentum (Darnel ryegrass), partial (40%) [TC377351]	gb|AFE85998,1| gibberellin 2-oxidase 3 isozyme D1 [Triticum aestivum] gb|AFV79561,1| gibberellin 2-oxidase 1-1 [Triticum aestivum] gb|AFV79562,1| gibberellin 2-oxidase 1-2 [Triticum aestivum] gb|AFV79566,1| gibberellin 2-oxidase 1-6 [Triticum aestivum]
A_99_P017619		0.0162527	0.00228946	-8.99765	-3.16955	8.99765	A211	Triticum aestivum A211 mRNA for fructan exohydrolase, complete cds [AB089270]	N/A
A_99_P001676		0.0202093	0.00386145	-8.81424	-3.13984	8.81424		GR45,122P24F010720 GR45 Triticum aestivum cDNA clone GR45122P24, mRNA sequence [GH731479]	###############################################################################################################################################################################################################################################################
A_99_P341356		0.00880151	0.000204692	-8.81146	-3.13938	8.81146		Rep: Os01g0740600 protein - Oryza sativa subsp, japonica (Rice), complete [TC428972]	ref|XP_007162581,1| hypothetical protein PHAVU_001G163400g [Phaseolus vulgaris] gb|ESW34575,1| hypothetical protein PHAVU_001G163400g [Phaseolus vulgaris]
A_99_P112790		0.0166121	0.00256052	-8.46047	-3.08074	8.46047	C311	Triticum aestivum C311 mRNA for fructan exohydrolase, complete cds [AB089271]	dbj|BAD99105,1| fructan exohydrolase [Triticum aestivum]
A_99_P437897		0.00880151	0.000234312	-8.29298	-3.05189	8.29298		Rep: Os02g0819400 protein - Oryza sativa subsp, japonica (Rice), partial (20%) [TC394743]	ref|XP_002451104,1| hypothetical protein SORBIDRAFT_05g024180 [Sorghum bicolor] gb|EES10092,1| hypothetical protein SORBIDRAFT_05g024180 [Sorghum bicolor]
A_99_P314056		0.029838	0.00916378	-8.16098	-3.02874	8.16098		FGAS058640 Triticum aestivum FGAS: Library 2 Gate 3 Triticum aestivum cDNA, mRNA sequence [CV764256]	gb|EMT12599,1| Iron sulfur cluster assembly protein 1, mitochondrial [Aegilops tauschii]
A_99_P215106		0.00584431	3.17788e-05	-8.15456	-3.02761	8.15456			gb|AFU72298,1| delta-1-pyrroline-5-carboxylate synthetase, partial [Deschampsia antarctica]
A_99_P305341		0.0127836	0.000915174	-8.09158	-3.01642	8.09158			dbj|BAJ97341,1| predicted protein [Hordeum vulgare subsp, vulgare]
A_99_P335751		0.0355598	0.0130597	-8.08595	-3.01542	8.08595		Rep: Chromosome chr14 scaffold_128, whole genome shotgun sequence - Vitis vinifera (Grape), partial (66%) [TC405171]	gb|EXB30677,1| hypothetical protein L484_001323 [Morus notabilis]
A_99_P152607		0.0154903	0.00197081	-8.0419	-3.00754	8.0419		CJ858389 Y, Ogihara unpublished cDNA library, whsctal Triticum aestivum cDNA clone whsctal4f18 5', mRNA sequence [CJ858389]	ref|XP_002533426,1| kinase, putative [Ricinus communis] gb|EEF28957,1| kinase, putative [Ricinus communis]
A_99_P425222		0.029678	0.00901949	-8.04039	-3.00727	8.04039		Rep: Non-specific lipid-transfer protein - Oryza sativa subsp, indica (Rice), partial (62%) [TC384883]	gb|ABC87311,1| sporocyteless [Brassica juncea]
A_99_P226001		0.0201705	0.00377506	-7.98349	-2.99702	7.98349		TSA: Triticum aestivum cultivar Bobwhite isotig26959,flagleaf mRNA sequence [HP636164]	ref|XP_006441793,1| hypothetical protein CICLE_v10021842mg [Citrus clementina] gb|ESR55033,1| hypothetical protein CICLE_v10021842mg [Citrus clementina]
A_99_P284871		0.0319024	0.0107384	-7.91184	-2.98401	7.91184			gb|ABC87311,1| sporocyteless [Brassica juncea]
A_99_P412102		0.0187403	0.00334881	-7.69782	-2.94445	7.69782	cla30	Triticum aestivum mRNA for putative In2,1-like protein [Y17386]	emb|CAA76758,1| putative In2,1 protein [Triticum aestivum]
A_99_P329006		0.012009	0.000579829	-7.64381	-2.93429	7.64381		Rep: Chromosome chr5 scaffold_2, whole genome shotgun sequence - Vitis vinifera (Grape), partial (36%) [TC461324]	ref|XP_004987270,1| PREDICTED: gibberellin 2-beta-dioxygenase 8-like [Setaria italica]
A_99_P036619		0.0293936	0.00883711	-7.46262	-2.89968	7.46262		WHE0060_B10_C20ZK Wheat endosperm cDNA library Triticum aestivum cDNA clone WHE0060_B10_C20, mRNA sequence [BQ167250]	gb|EMT12435,1| hypothetical protein F775_08514 [Aegilops tauschii]
A_99_P284731		0.00880151	9.1362e-05	-7.35628	-2.87898	7.35628		Rep: Integral membrane family protein-like - Oryza sativa subsp, japonica (Rice), partial (53%) [TC401879]	gb|EMT15072,1| hypothetical protein F775_08073 [Aegilops tauschii]
A_99_P417967		0.0127836	0.000955136	-7.32757	-2.87333	7.32757		Rep: Oxalate oxidase 2 precursor - Hordeum vulgare (Barley), complete [TC378956]	gb|EMT19969,1| hypothetical protein F775_43214 [Aegilops tauschii]
A_99_P468362		0.0261569	0.00685748	-7.28348	-2.86463	7.28348		Rep: Chromosome chr1 scaffold_5, whole genome shotgun sequence - Vitis vinifera (Grape), partial (28%) [TC415609]	gb|EMT33157,1| hypothetical protein F775_05054 [Aegilops tauschii]
A_99_P491897		0.0212512	0.00431583	-7.22968	-2.85393	7.22968		Triticum aestivum cDNA, clone: SET5_L23, cultivar: Chinese Spring [AK330965]	dbj|BAJ97341,1| predicted protein [Hordeum vulgare subsp, vulgare]
A_99_P231561		0.0267735	0.00730309	-7.20177	-2.84835	7.20177		Rep: Legumain-like protease precursor - Zea mays (Maize), partial (17%) [TC416366]	N/A
A_99_P165277		0.0135537	0.00115053	-7.01432	-2.8103	7.01432		Rep: Oxalate oxidase 2 precursor - Hordeum vulgare (Barley), complete [TC378956]	emb|CAA71051,1| pSBGer2 [Triticum aestivum]
A_99_P283051		0.0493288	0.0223179	-6.99503	-2.80633	6.99503	LOC543168	Triticum aestivum ADP-glucose pyrophosphorylase small subunit mRNA, complete cds; plastid [AY727927]	ref|XP_004497161,1| PREDICTED: pentatricopeptide repeat-containing protein At2g35130-like [Cicer arietinum]
A_99_P309716		0.00880151	0.000180291	-6.93368	-2.79362	6.93368		Rep: Multidrug resistance associated protein 1 - Zea mays (Maize), partial (12%) [TC425558]	N/A
A_99_P309721		0.00738611	6.61772e-05	-6.91133	-2.78896	6.91133		Rep: Multidrug resistance associated protein 1 - Zea mays (Maize), partial (16%) [TC374067]	ref|YP_635945,1| cell division protein [Acutodesmus obliquus] gb|ABD48227,1| cell division protein [Acutodesmus obliquus]
A_99_P016799		0.0319024	0.0106891	-6.85185	-2.77649	6.85185	LOC543168	Triticum aestivum ADP-glucose pyrophosphorylase small subunit mRNA, complete cds; plastid [AY727927]	ref|XP_003577084,1| PREDICTED: cytochrome P450 94A1-like [Brachypodium distachyon]
A_99_P282796		0.0229841	0.00533293	-6.8458	-2.77522	6.8458		Rep: Serine-threonine protein kinase - Triticum aestivum (Wheat), partial (56%) [TC414795]	gb|AAB58348,1|AAB58348 serine-threonine protein kinase [Triticum aestivum]
A_99_P085775		0.0123357	0.000650863	-6.80764	-2.76716	6.80764		Rep: Glutathione S-transferase GST 22 - Zea mays (Maize), partial (83%) [TC372250]	gb|EMT19517,1| hypothetical protein F775_19882 [Aegilops tauschii]
A_99_P488347		0.0402687	0.015875	-6.7637	-2.75781	6.7637		Triticum aestivum cDNA, clone: SET4_O03, cultivar: Chinese Spring [AK330613]	gb|EYU23109,1| hypothetical protein MIMGU_mgv1a007540mg [Mimulus guttatus]
A_99_P245061		0.0120589	0.000600242	-6.68933	-2.74186	6.68933		Rep: Aldehyde dehydrogenase family 7 member A1 - Euphorbia characias (Spurge), partial (34%) [TC373622]	gb|AFA36500,1| aldehyde dehydrogenase 7b, partial [Lolium perenne]
A_99_P411612		0.00880151	0.000202855	-6.68674	-2.7413	6.68674		Rep: Aldehyde dehydrogenase family 7 member A1 - Euphorbia characias (Spurge), partial (34%) [TC373622]	gb|AFA36500,1| aldehyde dehydrogenase 7b, partial [Lolium perenne]
A_99_P215086		0.00653832	5.10346e-05	-6.66836	-2.73733	6.66836			gb|EMS68460,1| hypothetical protein TRIUR3_05895 [Triticum urartu]
A_99_P378397		0.0133526	0.00107007	-6.66632	-2.73689	6.66632		Rep: F12K11,17 - Arabidopsis thaliana (Mouse-ear cress), partial (18%) [TC374558]	gb|EMT30860,1| Callose synthase 7 [Aegilops tauschii]
A_99_P291391		0.0127836	0.000962722	-6.4278	-2.68432	6.4278			ref|XP_002953136,1| hypothetical protein VOLCADRAFT_105823 [Volvox carteri f, nagariensis] gb|EFJ45735,1| hypothetical protein VOLCADRAFT_105823 [Volvox carteri f, nagariensis]
A_99_P562367		0.00880151	0.000207694	-6.42216	-2.68306	6.42216		Rep: Senescence-inducible chloroplast stay-green protein - Hordeum vulgare (Barley), partial (46%) [TC457227]	N/A
A_99_P369808		0.025087	0.00635605	-6.38893	-2.67557	6.38893		Rep: Chromosome chr18 scaffold_122, whole genome shotgun sequence - Vitis vinifera (Grape), partial (76%) [TC412850]	dbj|BAK05012,1| predicted protein [Hordeum vulgare subsp, vulgare]
A_99_P386442		0.0186052	0.00331541	-6.37638	-2.67274	6.37638		Rep: Galactose-binding like - Medicago truncatula (Barrel medic), partial (25%) [TC392167]	gb|EMS66623,1| hypothetical protein TRIUR3_18044 [Triticum urartu]
A_99_P445542		0.0164655	0.00242216	-6.36641	-2.67048	6.36641		Rep: Os01g0108600 protein - Oryza sativa subsp, japonica (Rice), partial (35%) [TC400572]	gb|EMS45882,1| hypothetical protein TRIUR3_14872 [Triticum urartu]
A_99_P551942		0.0267735	0.00729939	-6.34562	-2.66576	6.34562		TSA: Triticum aestivum contig26898,TraeRec mRNA sequence [JP230944]	gb|EMT01615,1| Myb-like protein J [Aegilops tauschii]
A_99_P087025		0.022932	0.00525489	-6.34274	-2.66511	6.34274		FGAS050163 Triticum aestivum FGAS: TaLt7 Triticum aestivum cDNA, mRNA sequence [CK166105]	N/A
A_99_P496107		0.0343522	0.0123717	-6.29295	-2.65374	6.29295			gb|EMS47785,1| Sugar transporter ERD6-like 6 [Triticum urartu]
A_99_P435227		0.0120927	0.000619985	-6.21082	-2.63478	6.21082		Triticum aestivum cDNA, clone: WT006_N18, cultivar: Chinese Spring [AK333593]	gb|EMT16535,1| hypothetical protein F775_08208 [Aegilops tauschii]
A_99_P000331		0.029678	0.00907795	-6.21008	-2.63461	6.21008		Rep: Small heat shock protein Hsp23,5 precursor - Triticum aestivum (Wheat), complete [TC400048]	gb|EMT14996,1| hypothetical protein F775_07398 [Aegilops tauschii]
A_99_P504752		0.0137036	0.00121502	-6.20233	-2.63281	6.20233		Rep: Chromosome undetermined SCAF5463, whole genome shotgun sequence - Tetraodon nigroviridis (Green puffer), partial (5%) [TC423811]	gb|EEE58855,1| hypothetical protein OsJ_10446 [Oryza sativa Japonica Group]
A_99_P261026		0.0409223	0.0165196	-6.14106	-2.61849	6.14106		Rep: Chromosome chr14 scaffold_9, whole genome shotgun sequence - Vitis vinifera (Grape), partial (66%) [TC410236]	gb|EMS49006,1| Pto-interacting protein 1 [Triticum urartu]
A_99_P168389		0.0331309	0.011408	-6.12645	-2.61505	6.12645		KUCD01_06_B10_T3 WSWR cDNA library Triticum aestivum cDNA, mRNA sequence [DN829412]	gb|EMT19151,1| Putative NADH-ubiquinone oxidoreductase C3A11,07, mitochondrial [Aegilops tauschii]
A_99_P484697		0.0225474	0.00502806	-6.11034	-2.61125	6.11034		Rep: Epoxide hydrolase - Ananas comosus (Pineapple), partial (36%) [TC424558]	gb|EMT10705,1| hypothetical protein F775_43222 [Aegilops tauschii]
A_99_P316491		0.0341306	0.0120481	-6.03227	-2.5927	6.03227			gb|EMS60575,1| hypothetical protein TRIUR3_11994 [Triticum urartu]
A_99_P536052		0.0389649	0.0151864	-6.01195	-2.58783	6.01195			ref|NP_001169637,1| uncharacterized protein LOC100383518 [Zea mays] gb|ACN34361,1| unknown [Zea mays] gb|AFW68058,1| beta tubulin4 [Zea mays]
A_99_P218296		0.0483792	0.0216008	-6.00087	-2.58517	6.00087			gb|EMT33156,1| hypothetical protein F775_10492 [Aegilops tauschii]
A_99_P257091		0.00368733	3.67081e-06	-5.96142	-2.57566	5.96142		Rep: Chromosome chr14 scaffold_128, whole genome shotgun sequence - Vitis vinifera (Grape), partial (39%) [TC382170]	gb|EYU30493,1| hypothetical protein MIMGU_mgv1a024563mg, partial [Mimulus guttatus]
A_99_P136025		0.0135911	0.00118316	-5.86676	-2.55256	5.86676		Rep: Chromosome chr11 scaffold_13, whole genome shotgun sequence - Vitis vinifera (Grape), partial (4%) [TC440531]	gb|EMT08802,1| Putative glutamate carboxypeptidase 2 [Aegilops tauschii]
A_99_P388982		0.0245503	0.00597567	-5.82771	-2.54293	5.82771		Rep: ZIM motif family protein, expressed - Oryza sativa subsp, japonica (Rice), partial (54%) [TC430489]	emb|CAI93180,1| glycosyltransferase [Triticum aestivum]
A_99_P170159		0.0309593	0.0100068	-5.82332	-2.54184	5.82332		TSA: Triticum aestivum contig26898,TraeRec mRNA sequence [JP230944]	ref|XP_006842245,1| hypothetical protein AMTR_s00078p00192630 [Amborella trichopoda] gb|ERN03920,1| hypothetical protein AMTR_s00078p00192630 [Amborella trichopoda]
A_99_P093810		0.0168988	0.00273738	-5.81093	-2.53877	5.81093	pSBGer3	T,aestivum mRNA for germin-like protein 3 [Y09917]	dbj|BAJ98633,1| predicted protein [Hordeum vulgare subsp, vulgare]
A_99_P215111		0.00653832	5.27156e-05	-5.75137	-2.5239	5.75137			emb|CBI29667,3| unnamed protein product [Vitis vinifera]
A_99_P092960		0.0452725	0.019087	-5.7302	-2.51859	5.7302		wip1c,pk006,d19 wip1c Triticum aestivum cDNA clone wip1c,pk006,d19 5' end, mRNA sequence [CA731387]	ref|XP_007017414,1| Cytochrome P450 82A3, putative [Theobroma cacao] gb|EOY14639,1| Cytochrome P450 82A3, putative [Theobroma cacao]
A_99_P288236		0.0293908	0.00881986	-5.70785	-2.51295	5.70785			ref|XP_007150476,1| hypothetical protein PHAVU_005G155700g [Phaseolus vulgaris] gb|ESW22470,1| hypothetical protein PHAVU_005G155700g [Phaseolus vulgaris]
A_99_P261221		0.0154903	0.00193254	-5.69244	-2.50905	5.69244		Rep: Os04g0301500 protein - Oryza sativa subsp, japonica (Rice), partial (24%) [TC403274]	N/A
A_99_P311086		0.0147865	0.00139842	-5.67781	-2.50533	5.67781		Rep: Os05g0518800 protein - Oryza sativa subsp, japonica (Rice), partial (37%) [TC390408]	gb|EMS45032,1| Sulfate transporter 4,1, chloroplastic [Triticum urartu]
A_99_P284721		0.0149098	0.00142135	-5.65082	-2.49846	5.65082		Rep: Integral membrane family protein-like - Oryza sativa subsp, japonica (Rice), partial (72%) [TC377974]	dbj|BAJ88632,1| predicted protein [Hordeum vulgare subsp, vulgare]
A_99_P412942		0.0154903	0.0020351	-5.63761	-2.49508	5.63761		Rep: UDP-glucoronosyl and UDP-glucosyl transferase family protein, expressed - Oryza sativa subsp, japonica (Rice), partial (45%) [TC374837]	ref|XP_003589518,1| F-box/LRR-repeat protein [Medicago truncatula] gb|AES59769,1| F-box/LRR-repeat protein [Medicago truncatula]
A_99_P343251		0.00653832	4.71031e-05	-5.54596	-2.47144	5.54596			gb|ACR38084,1| unknown [Zea mays]
A_99_P095210		0.0273036	0.00753923	-5.53814	-2.4694	5.53814		WHE4108_G08_N16ZS Wheat salt-stressed root cDNA library Triticum aestivum cDNA clone WHE4108_G08_N16, mRNA sequence [BQ743841]	dbj|BAJ92219,1| predicted protein [Hordeum vulgare subsp, vulgare]
A_99_P479897		0.0134799	0.00109521	-5.52478	-2.46592	5.52478		Rep: PE-PGRS family protein - Mycobacterium tuberculosis (strain F11), partial (5%) [TC422054]	gb|EMT28515,1| hypothetical protein F775_29119 [Aegilops tauschii]
A_99_P161637		0.0202093	0.00389413	-5.51933	-2.46449	5.51933	WRN3	FGAS053798 Triticum aestivum FGAS: Library 2 Gate 3 Triticum aestivum cDNA, mRNA sequence [CV759414]	emb|CAI93180,1| glycosyltransferase [Triticum aestivum]
A_99_P316786		0.0172787	0.00284682	-5.50948	-2.46191	5.50948			ref|XP_003589518,1| F-box/LRR-repeat protein [Medicago truncatula] gb|AES59769,1| F-box/LRR-repeat protein [Medicago truncatula]
A_99_P551572		0.0125509	0.000738679	-5.49639	-2.45848	5.49639		TSA: Triticum aestivum cultivar Bobwhite isotig09952,flagleaf mRNA sequence [HP619154]	ref|XP_006399863,1| hypothetical protein EUTSA_v10012453mg [Eutrema salsugineum] gb|ESQ41316,1| hypothetical protein EUTSA_v10012453mg [Eutrema salsugineum]
A_99_P339971		0.0254757	0.00655596	-5.4936	-2.45775	5.4936		Rep: Chromosome chr6 scaffold_3, whole genome shotgun sequence - Vitis vinifera (Grape), partial (27%) [TC404695]	gb|AEH43880,1| EFR [Biscutella auriculata]
A_99_P446552		0.0192504	0.00350704	-5.49103	-2.45708	5.49103		Rep: Metallothionein-like protein type 3 - Hordeum vulgare var, distichum (Two-rowed barley), complete [TC401261]	gb|EMT20371,1| hypothetical protein F775_43862 [Aegilops tauschii]
A_99_P449637		0.0145617	0.00134817	-5.4776	-2.45354	5.4776		Rep: L-allo-threonine aldolase-related protein - Solanum tuberosum (Potato), partial (18%) [TC403445]	gb|EMS52584,1| L-allo-threonine aldolase [Triticum urartu]
A_99_P343256		0.0181777	0.00316225	-5.4733	-2.45241	5.4733			gb|ACR38084,1| unknown [Zea mays]
A_99_P376327		0.033391	0.0116333	-5.46037	-2.449	5.46037			ref|XP_001762580,1| predicted protein [Physcomitrella patens] gb|EDQ72703,1| predicted protein [Physcomitrella patens]
A_99_P387057		0.0151091	0.00151657	-5.45832	-2.44846	5.45832		Rep: AAA-type ATPase-like - Oryza sativa subsp, japonica (Rice), partial (49%) [TC428037]	dbj|BAK01782,1| predicted protein [Hordeum vulgare subsp, vulgare]
A_99_P295261		0.0370615	0.0141125	-5.45245	-2.44691	5.45245			ref|XP_003575633,1| PREDICTED: uncharacterized protein LOC100824418 [Brachypodium distachyon]
A_99_P442837		0.020185	0.00383806	-5.42907	-2.44071	5.42907	LOC543445	Triticum aestivum glutathione-S-transferase 19E50 mRNA, complete cds [AY064481]	ref|XP_004248957,1| PREDICTED: protein BONZAI 3-like [Solanum lycopersicum]
A_99_P410357		0.0279632	0.00790705	-5.38983	-2.43024	5.38983		Rep: Zinc finger protein-like - Oryza sativa subsp, japonica (Rice), partial (59%) [TC372432]	gb|EMS66508,1| hypothetical protein TRIUR3_25920 [Triticum urartu]
A_99_P256846		0.00880151	0.000198949	-5.36293	-2.42302	5.36293			emb|CAN81149,1| hypothetical protein VITISV_020815 [Vitis vinifera]
A_99_P166249		0.0166121	0.00256773	-5.34636	-2.41856	5.34636		Rep: Metallothionein-like protein type 3 - Hordeum vulgare var, distichum (Two-rowed barley), partial (95%) [TC395998]	dbj|BAK06155,1| predicted protein [Hordeum vulgare subsp, vulgare] gb|AFK12211,1| metallothionein [Hordeum vulgare]
A_99_P332911		0.0250058	0.00630847	-5.28862	-2.40289	5.28862		WHE4108_G08_N16ZS Wheat salt-stressed root cDNA library Triticum aestivum cDNA clone WHE4108_G08_N16, mRNA sequence [BQ743841]	dbj|BAJ92219,1| predicted protein [Hordeum vulgare subsp, vulgare]
A_99_P322261		0.0177525	0.0029779	-5.28778	-2.40266	5.28778			ref|XP_006585216,1| PREDICTED: G-type lectin S-receptor-like serine/threonine-protein kinase At1g67520-like [Glycine max]
A_99_P011814		0.00880151	0.000261403	-5.28447	-2.40176	5.28447		Triticum aestivum clone wre1n,pk0030,h1:fis, full insert mRNA sequence [BT009575]	gb|EMT08802,1| Putative glutamate carboxypeptidase 2 [Aegilops tauschii]
A_99_P501777		0.0403797	0.0160192	-5.2348	-2.38813	5.2348		Rep: UDP-glucoronosyl and UDP-glucosyl transferase family protein, expressed - Oryza sativa subsp, japonica (Rice), partial (22%) [TC432501]	gb|EMS49580,1| Hydroquinone glucosyltransferase [Triticum urartu]
A_99_P562667		0.0235894	0.00559702	-5.17852	-2.37254	5.17852		Rep: Expressed protein - Oryza sativa subsp, japonica (Rice), partial (53%) [TC457121]	dbj|BAK04993,1| predicted protein [Hordeum vulgare subsp, vulgare]
A_99_P446632		0.029678	0.00905164	-5.15086	-2.36481	5.15086			gb|EMS54288,1| Uncharacterized transporter C5D6,04 [Triticum urartu]
A_99_P307251		0.0220704	0.00471423	-5.11541	-2.35485	5.11541		Rep: Glycolate oxidase - Zantedeschia aethiopica (White calla lily), partial (80%) [TC384194]	N/A
A_99_P081500		0.0262118	0.00694762	-5.07426	-2.3432	5.07426		WNEL23c10 Wheat EST endosperm library Triticum aestivum cDNA clone WNEL23c10 5' similar to Unknown Function, mRNA sequence [CV065516]	ref|XP_001416697,1| predicted protein [Ostreococcus lucimarinus CCE9901] gb|ABO94990,1| predicted protein [Ostreococcus lucimarinus CCE9901]
A_99_P386122		0.0256466	0.00666378	-5.05816	-2.33861	5.05816		Rep: Os09g0544900 protein - Oryza sativa subsp, japonica (Rice), partial (55%) [TC444164]	gb|EMT11761,1| Peroxisomal multifunctional enzyme type 2 [Aegilops tauschii]
A_99_P400822		0.0229841	0.00536562	-5.00203	-2.32251	5.00203			ref|XP_005651812,1| hypothetical protein COCSUDRAFT_55287 [Coccomyxa subellipsoidea C-169] gb|EIE27268,1| hypothetical protein COCSUDRAFT_55287 [Coccomyxa subellipsoidea C-169]
A_99_P546587		0.0117312	0.000540137	-4.98224	-2.31679	4.98224	pSBGer3	T,aestivum mRNA for germin-like protein 3 [Y09917]	emb|CAA71053,1| pSBGer4 [Triticum aestivum]
A_99_P011329		0.0313308	0.0103195	-4.9737	-2.31432	4.9737		Triticum aestivum clone wr1,pk0085,h9:fis, full insert mRNA sequence [BT009504]	gb|EMS57040,1| Nicotianamine aminotransferase A [Triticum urartu]
A_99_P293971		0.0278671	0.00785106	-4.97024	-2.31332	4.97024			###############################################################################################################################################################################################################################################################
A_99_P242531		0.0240323	0.0057958	-4.88966	-2.28973	4.88966			gb|EMS45331,1| hypothetical protein TRIUR3_29962 [Triticum urartu]
A_99_P242556		0.0213423	0.0043697	-4.88874	-2.28946	4.88874		Rep: Chromosome chr1 scaffold_75, whole genome shotgun sequence - Vitis vinifera (Grape), partial (82%) [TC393315]	gb|AEW46826,1| gamma prolamin, partial [Hordeum brachyantherum subsp, brachyantherum]
A_99_P295346		0.0271832	0.00746448	-4.87529	-2.28549	4.87529		Rep: Chromosome undetermined scaffold_222, whole genome shotgun sequence - Vitis vinifera (Grape), partial (38%) [TC405040]	gb|EMT08034,1| Peroxisomal-coenzyme A synthetase [Aegilops tauschii]
A_99_P309201		0.0151869	0.00167103	-4.86188	-2.28152	4.86188		Rep: Alternative oxidase - Triticum aestivum (Wheat), complete [TC369763]	ref|NP_001167940,1| uncharacterized protein LOC100381654 [Zea mays] gb|ACN26586,1| unknown [Zea mays]
A_99_P495547		0.0154903	0.00205591	-4.8499	-2.27795	4.8499		Rep: Chromosome chr2 scaffold_105, whole genome shotgun sequence - Vitis vinifera (Grape), partial (9%) [TC429715]	ref|XP_003612653,1| ATP-dependent DNA helicase PIF1 [Medicago truncatula] gb|AES95611,1| ATP-dependent DNA helicase PIF1 [Medicago truncatula]
A_99_P295351		0.0137036	0.00122663	-4.84328	-2.27598	4.84328		Rep: Peroxisomal-coenzyme a synthetase - Oryza sativa subsp, indica (Rice), partial (87%) [TC453441]	gb|EMT08034,1| Peroxisomal-coenzyme A synthetase [Aegilops tauschii]
A_99_P145261		0.0240466	0.00582912	-4.83023	-2.27209	4.83023		wdi1c,pk004,o6 wdi1c Triticum aestivum cDNA clone wdi1c,pk004,o6 5' end, mRNA sequence [CA728497]	gb|EMT20240,1| hypothetical protein F775_17895 [Aegilops tauschii]
A_99_P456762		0.0217666	0.00456135	-4.811	-2.26634	4.811			gb|EMS56558,1| hypothetical protein TRIUR3_26532 [Triticum urartu]
A_99_P491842		0.0151869	0.0016411	-4.78965	-2.25992	4.78965	LOC100682438	Triticum aestivum cDNA, clone: SET5_G19, cultivar: Chinese Spring [AK330832]	gb|AAK11565,1|AF318501_1 ent-kaurenoic acid hydroxylase [Arabidopsis thaliana]
A_99_P304216		0.0212422	0.0042829	-4.77366	-2.2551	4.77366			ref|XP_001783766,1| predicted protein [Physcomitrella patens] gb|EDQ51418,1| predicted protein [Physcomitrella patens]
A_99_P391837		0.0221812	0.00478726	-4.7259	-2.24059	4.7259		Rep: GRAB2 protein - Triticum sp, partial (52%) [TC403220]	N/A
A_99_P062653		0.0199681	0.0037173	-4.68421	-2.22781	4.68421			ref|XP_004248957,1| PREDICTED: protein BONZAI 3-like [Solanum lycopersicum]
A_99_P410912		0.0124036	0.0006733	-4.66242	-2.22108	4.66242	FKBP77	Triticum aestivum cDNA, clone: WT004_M12, cultivar: Chinese Spring [AK332751]	gb|EMT25795,1| 70 kDa peptidyl-prolyl isomerase [Aegilops tauschii]
A_99_P301436		0.0124036	0.000681654	-4.63919	-2.21387	4.63919		Rep: Acid phosphatase - Oryza sativa subsp, japonica (Rice), partial (20%) [TC422747]	gb|ACO83273,1| SRK [Capsella rubella] gb|ACO83274,1| SRK [Capsella rubella] gb|ACO83275,1| SRK [Capsella rubella] gb|ACO83276,1| SRK [Capsella rubella] gb|ACO83277,1| SRK [Capsella rubella]
A_99_P517172		0.0151091	0.00158804	-4.58342	-2.19642	4.58342		Rep: Myb4 transcription factor - Hordeum vulgare (Barley), partial (20%) [TC439362]	dbj|BAK02388,1| predicted protein [Hordeum vulgare subsp, vulgare]
A_99_P371417		0.0166121	0.00260027	-4.56925	-2.19196	4.56925	UGT	Triticum aestivum cultivar Wangshuibai UDP-glycosyltransferase (UGT) mRNA, complete cds [FJ236328]	gb|ACB47288,1| UDP-glucoronosyl/UDP-glucosyl transferase [Triticum aestivum]
A_99_P255256		0.0171907	0.00281521	-4.56428	-2.19039	4.56428		Rep: Hydroxyproline-rich glycoprotein - Chlamydomonas reinhardtii, partial (9%) [TC414302]	gb|ACN35066,1| unknown [Zea mays]
A_99_P364371		0.0176325	0.00294021	-4.53106	-2.17985	4.53106			gb|EMT28611,1| hypothetical protein F775_13942 [Aegilops tauschii]
A_99_P553062		0.0151091	0.00158966	-4.5196	-2.17619	4.5196		Rep: Peroxisomal-coenzyme a synthetase - Oryza sativa subsp, indica (Rice), partial (87%) [TC453441]	gb|EMT08034,1| Peroxisomal-coenzyme A synthetase [Aegilops tauschii]
A_99_P322156		0.0240323	0.00580171	-4.49664	-2.16885	4.49664		Rep: Os01g0108600 protein - Oryza sativa subsp, japonica (Rice), partial (35%) [TC400572]	gb|EMS45882,1| hypothetical protein TRIUR3_14872 [Triticum urartu]
A_99_P551602		0.0375272	0.0144019	-4.48167	-2.16404	4.48167		Rep: Zinc transporter ZIP - Triticum aestivum (Wheat), partial (15%) [TC452877]	gb|EMT21974,1| Zinc transporter 1 [Aegilops tauschii]
A_99_P255776		0.0127836	0.000858697	-4.47311	-2.16128	4.47311			N/A
A_99_P172124		0.0319024	0.0107269	-4.43619	-2.14932	4.43619			gb|ACB47288,1| UDP-glucoronosyl/UDP-glucosyl transferase [Triticum aestivum]
A_99_P526947		0.000394531	1.96382e-07	-4.31794	-2.11034	4.31794		Triticum aestivum cDNA, clone: WT009_F15, cultivar: Chinese Spring [AK334289]	gb|EMS45159,1| hypothetical protein TRIUR3_27172 [Triticum urartu]
A_99_P024759		0.00880151	0.000254932	-4.27846	-2.09709	4.27846		TSA: Triticum aestivum contig12522,TraeRec mRNA sequence [JP217799]	dbj|BAJ89172,1| predicted protein [Hordeum vulgare subsp, vulgare]
A_99_P200536		0.00880151	0.000164834	-4.27555	-2.09611	4.27555		Rep: Chromosome chr16 scaffold_10, whole genome shotgun sequence - Vitis vinifera (Grape), partial (14%) [TC421510]	N/A
A_99_P143873		0.0339595	0.0119153	-4.26236	-2.09165	4.26236		wr1,pk0067,a4 wr1 Triticum aestivum cDNA clone wr1,pk0067,a4 5' end, mRNA sequence [CA607224]	gb|EXC30783,1| hypothetical protein L484_027959 [Morus notabilis]
A_99_P256836		0.0111988	0.000460102	-4.1929	-2.06795	4.1929		Rep: Isoform 2 of Q0JGZ6 - Oryza sativa subsp, japonica (Rice), partial (54%) [TC381624]	gb|EMT20285,1| hypothetical protein F775_30384 [Aegilops tauschii]
A_99_P117730		0.0154903	0.00200755	-4.18231	-2.0643	4.18231		CJ722857 Y,Ogihara unpublished cDNA library Wh_VHS Triticum aestivum cDNA clone whvh18h05 5', mRNA sequence [CJ722857]	gb|EMS49698,1| hypothetical protein TRIUR3_24810 [Triticum urartu]
A_99_P518442		0.0166121	0.00262123	-4.17912	-2.0632	4.17912		Rep: Expressed protein - Oryza sativa subsp, japonica (Rice), partial (26%) [TC439897]	gb|EMS57988,1| hypothetical protein TRIUR3_31122 [Triticum urartu]
A_99_P305711		0.0342068	0.0121401	-4.16826	-2.05944	4.16826			gb|EMT24463,1| Lectin-domain containing receptor kinase A4,3 [Aegilops tauschii]
A_99_P225396		0.0150951	0.00148772	-4.15456	-2.0547	4.15456	pSBGer3	T,aestivum mRNA for germin-like protein 3 [Y09917]	gb|ACQ41882,1| germin-like protein 2 [Triticum aestivum]
A_99_P265646		0.0154903	0.00191182	-4.15061	-2.05332	4.15061		Rep: Chromosome chr4 scaffold_32, whole genome shotgun sequence - Vitis vinifera (Grape), partial (76%) [TC390068]	N/A
A_99_P225456		0.0220704	0.00471334	-4.14627	-2.05181	4.14627		Rep: PSBGer1 protein - Triticum aestivum (Wheat), complete [TC372166]	emb|CAA71053,1| pSBGer4 [Triticum aestivum]
A_99_P255266		0.0171964	0.00282469	-4.14388	-2.05098	4.14388		Triticum aestivum cDNA, clone: WT006_I01, cultivar: Chinese Spring [AK333449]	ref|XP_001420892,1| predicted protein [Ostreococcus lucimarinus CCE9901] gb|ABO99185,1| predicted protein [Ostreococcus lucimarinus CCE9901]
A_99_P549752		0.0220881	0.00473866	-4.14255	-2.05052	4.14255		CJ665569 Y,Ogihara unpublished cDNA library Wh_KMP Triticum aestivum cDNA clone whkp4a17 5', mRNA sequence [CJ665569]	dbj|BAJ92799,1| predicted protein [Hordeum vulgare subsp, vulgare] dbj|BAK00760,1| predicted protein [Hordeum vulgare subsp, vulgare] dbj|BAJ97506,1| predicted protein [Hordeum vulgare subsp, vulgare]
A_99_P191842		0.018007	0.00304969	-4.13154	-2.04668	4.13154		Triticum aestivum cDNA, clone: SET4_G01, cultivar: Chinese Spring [AK330405]	emb|CAI93180,1| glycosyltransferase [Triticum aestivum]
A_99_P555867		0.0202093	0.00388411	-4.12816	-2.0455	4.12816			gb|AAX94996,1| Protein kinase domain, putative [Oryza sativa Japonica Group] gb|ABA95430,1| Protein kinase domain containing protein [Oryza sativa Japonica Group]
A_99_P431187		0.0166121	0.00261401	-4.11779	-2.04187	4.11779		Rep: Aldose reductase - Zea mays (Maize), partial (40%) [TC389453]	gb|EMT22693,1| Alcohol dehydrogenase (NADP+) A [Aegilops tauschii]
A_99_P000836		0.0144978	0.00133504	-4.08959	-2.03196	4.08959		WHE2101_F12_K23ZS Wheat salt-stressed crown cDNA library Triticum aestivum cDNA clone WHE2101_F12_K23, mRNA sequence [BF474922]	###############################################################################################################################################################################################################################################################
A_99_P132240		0.0223212	0.00489977	-4.06295	-2.02253	4.06295		CJ665569 Y,Ogihara unpublished cDNA library Wh_KMP Triticum aestivum cDNA clone whkp4a17 5', mRNA sequence [CJ665569]	dbj|BAJ92799,1| predicted protein [Hordeum vulgare subsp, vulgare] dbj|BAK00760,1| predicted protein [Hordeum vulgare subsp, vulgare] dbj|BAJ97506,1| predicted protein [Hordeum vulgare subsp, vulgare]
A_99_P478852		0.0127836	0.000909622	-4.0587	-2.02102	4.0587		Rep: Chromosome chr16 scaffold_10, whole genome shotgun sequence - Vitis vinifera (Grape), partial (14%) [TC421510]	sp|Q84N28,1|FOMT1_WHEAT RecName: Full=Flavone O-methyltransferase 1; AltName: Full=Caffeic acid O-methyltransferase; Short=TaCOMT1 [Triticum aestivum] gb|AAP23942,1| caffeic acid O-methyltransferase [Triticum aestivum]
A_99_P166809		0.0164557	0.00236137	-4.0568	-2.02034	4.0568		G608,103G02F010904 G608 Triticum aestivum cDNA clone G608103G02, mRNA sequence [CD916898]	gb|EMT01729,1| hypothetical protein F775_26337 [Aegilops tauschii]
A_99_P552847		0.0111988	0.000454902	-4.02398	-2.00862	4.02398			ref|XP_007013734,1| Embryo defective 2410 isoform 2 [Theobroma cacao] gb|EOY31353,1| Embryo defective 2410 isoform 2 [Theobroma cacao]
A_99_P435737		0.0239423	0.00569659	-3.97194	-1.98984	3.97194		Rep: Os01g0740600 protein - Oryza sativa subsp, japonica (Rice), partial (98%) [TC393120]	ref|XP_003084249,1| unnamed protein product [Ostreococcus tauri] emb|CAL58314,1| unnamed protein product [Ostreococcus tauri]
A_99_P024019		0.0483067	0.0212873	-3.96873	-1.98868	3.96873			gb|EMT22998,1| hypothetical protein F775_28843 [Aegilops tauschii]
A_99_P456682		0.0263231	0.00705446	-3.9621	-1.98627	3.9621		Rep: LigA - Anaeromyxobacter sp, (strain Fw109-5), partial (9%) [TC401695]	emb|CAI93180,1| glycosyltransferase [Triticum aestivum]
A_99_P012669		0.0483067	0.0214041	-3.95003	-1.98186	3.95003		FGAS029804 Triticum aestivum FGAS: Library 6 CAP GATE 1 Triticum aestivum cDNA, mRNA sequence [CK217802]	N/A
A_99_P303276		0.0240323	0.00578726	-3.93902	-1.97784	3.93902		Triticum aestivum cDNA, clone: SET4_O03, cultivar: Chinese Spring [AK330613]	gb|EMT22845,1| Lycopene beta cyclase, chloroplastic [Aegilops tauschii]
A_99_P441142		0.0127836	0.000956597	-3.93055	-1.97473	3.93055		FGAS018018 Triticum aestivum FGAS: Library 5 GATE 7 Triticum aestivum cDNA, mRNA sequence [CK206425]	dbj|BAJ85757,1| predicted protein [Hordeum vulgare subsp, vulgare] dbj|BAK00957,1| predicted protein [Hordeum vulgare subsp, vulgare]
A_99_P330681		0.0151091	0.00150513	-3.88285	-1.95711	3.88285			gb|EMT16840,1| hypothetical protein F775_43822 [Aegilops tauschii]
A_99_P528152		0.0154903	0.00199644	-3.84547	-1.94316	3.84547	LOC100682438	Triticum aestivum cDNA, clone: SET5_G19, cultivar: Chinese Spring [AK330832]	gb|EMT11675,1| hypothetical protein F775_28879 [Aegilops tauschii]
A_99_P251946		0.0120589	0.000597898	-3.81281	-1.93086	3.81281		Rep: Os05g0407100 protein - Oryza sativa subsp, japonica (Rice), partial (74%) [TC415290]	dbj|BAK03654,1| predicted protein [Hordeum vulgare subsp, vulgare] dbj|BAK08228,1| predicted protein [Hordeum vulgare subsp, vulgare]
A_99_P437312		0.0202316	0.00392986	-3.7702	-1.91464	3.7702			gb|EMS65013,1| Anthocyanin 3'-O-beta-glucosyltransferase [Triticum urartu]
A_99_P004116		0.00880151	0.000141702	-3.75504	-1.90883	3.75504		FGAS018018 Triticum aestivum FGAS: Library 5 GATE 7 Triticum aestivum cDNA, mRNA sequence [CK206425]	gb|AAX94996,1| Protein kinase domain, putative [Oryza sativa Japonica Group] gb|ABA95430,1| Protein kinase domain containing protein [Oryza sativa Japonica Group]
A_99_P245041		0.0151869	0.00165717	-3.74408	-1.90461	3.74408	LOC100682438	Triticum aestivum cDNA, clone: SET5_G19, cultivar: Chinese Spring [AK330832]	gb|EMT11675,1| hypothetical protein F775_28879 [Aegilops tauschii]
A_99_P278301		0.0221812	0.00480706	-3.72371	-1.89674	3.72371		Rep: Gt-2 - Oryza sativa (Rice), partial (33%) [TC403644]	ref|XP_004142896,1| PREDICTED: F-box protein At3g12350-like [Cucumis sativus] ref|XP_004156384,1| PREDICTED: F-box protein At3g12350-like [Cucumis sativus]
A_99_P220451		0.0154903	0.00190495	-3.70948	-1.89122	3.70948			ref|XP_006388440,1| hypothetical protein POPTR_0185s002001g, partial [Populus trichocarpa] gb|ERP47354,1| hypothetical protein POPTR_0185s002001g, partial [Populus trichocarpa]
A_99_P475097		0.00880151	0.000213085	-3.69241	-1.88456	3.69241		Rep: Chromosome chr1 scaffold_136, whole genome shotgun sequence - Vitis vinifera (Grape), partial (97%) [TC419481]	ref|XP_007148555,1| hypothetical protein PHAVU_006G218500g [Phaseolus vulgaris] gb|ESW20549,1| hypothetical protein PHAVU_006G218500g [Phaseolus vulgaris]
A_99_P338771		0.00653832	4.62741e-05	-3.68055	-1.87992	3.68055		Rep: C2 domain-containing protein - Hordeum vulgare var, distichum (Two-rowed barley), partial (22%) [TC445562]	N/A
A_99_P000412		0.0127836	0.000980824	-3.67909	-1.87935	3.67909	Waox1a	Triticum aestivum mRNA for alternative oxidase, complete cds [AB078882]	ref|NP_001167940,1| uncharacterized protein LOC100381654 [Zea mays] gb|ACN26586,1| unknown [Zea mays]
A_99_P057671		0.0415268	0.0168877	-3.67665	-1.87839	3.67665		FGAS081088 Triticum aestivum FGAS: Library 3 Gate 6 Triticum aestivum cDNA, mRNA sequence [DR735418]	dbj|BAJ96673,1| predicted protein [Hordeum vulgare subsp, vulgare] dbj|BAK01096,1| predicted protein [Hordeum vulgare subsp, vulgare]
A_99_P546477		0.0316285	0.0104815	-3.66358	-1.87325	3.66358			###############################################################################################################################################################################################################################################################
A_99_P422297		0.016871	0.00268726	-3.65447	-1.86966	3.65447		Rep: Competence protein - Neisseria meningitidis serogroup A, partial (4%) [TC382490]	gb|EMS59049,1| hypothetical protein TRIUR3_08315 [Triticum urartu]
A_99_P396362		0.0202316	0.00393755	-3.6299	-1.85993	3.6299			ref|XP_007038558,1| Uncharacterized protein TCM_015067 [Theobroma cacao] gb|EOY23059,1| Uncharacterized protein TCM_015067 [Theobroma cacao]
A_99_P202516		0.0120589	0.000589743	-3.6285	-1.85937	3.6285		Rep: Chromosome chr1 scaffold_136, whole genome shotgun sequence - Vitis vinifera (Grape), partial (97%) [TC419481]	###############################################################################################################################################################################################################################################################
A_99_P269526		0.0165063	0.0024402	-3.61122	-1.85249	3.61122		Rep: DT-related protein - Oryza sativa subsp, japonica (Rice), complete [TC371176]	ref|XP_006643927,1| PREDICTED: V-type proton ATPase subunit E-like [Oryza brachyantha]
A_99_P442392		0.0413804	0.0167664	-3.60951	-1.8518	3.60951		MISCREPU2 T,aestivum mitochondrion fMet, 18S, 5S repeat unit DNA, partial (21%) [TC375627]	gb|EPS73844,1| hypothetical protein M569_00907, partial [Genlisea aurea]
A_99_P309536		0.0113247	0.000505167	-3.60651	-1.8506	3.60651			emb|CAC82185,1| ornithine aminotransferase [Medicago truncatula]
A_99_P452397		0.0262118	0.00693286	-3.60337	-1.84935	3.60337		Rep: Os07g0671800 protein - Oryza sativa subsp, japonica (Rice), partial (31%) [TC405379]	N/A
A_99_P200501		0.0127836	0.000992657	-3.59943	-1.84777	3.59943			gb|EMS52674,1| hypothetical protein TRIUR3_25203 [Triticum urartu]
A_99_P489217		0.0309593	0.00990565	-3.58707	-1.84281	3.58707		Rep: Arginine decarboxylase - Oryza sativa subsp, japonica (Rice), partial (22%) [TC426758]	ref|XP_003081282,1| HUA enhancer 2 (ISS) [Ostreococcus tauri] emb|CAL55451,1| HUA enhancer 2 (ISS) [Ostreococcus tauri]
A_99_P501312		0.0293908	0.00882162	-3.57636	-1.83849	3.57636		Rep: Expressed protein - Oryza sativa subsp, japonica (Rice), partial (43%) [TC432289]	dbj|BAJ92219,1| predicted protein [Hordeum vulgare subsp, vulgare]
A_99_P484672		0.0309593	0.00985448	-3.5612	-1.83236	3.5612			ref|XP_002322568,2| hypothetical protein POPTR_0016s02330g [Populus trichocarpa] gb|EEF04329,2| hypothetical protein POPTR_0016s02330g [Populus trichocarpa]
A_99_P390417		0.0339842	0.0119427	-3.55286	-1.82898	3.55286		Rep: Biotin/lipoyl attachment domain-containing protein - Roseiflexus castenholzii DSM 13941, partial (13%) [TC409722]	emb|CAI93180,1| glycosyltransferase [Triticum aestivum]
A_99_P255271		0.0248395	0.00616282	-3.54292	-1.82494	3.54292			N/A
A_99_P158612		0.0360037	0.0133883	-3.53658	-1.82236	3.53658			gb|EMT04135,1| Monodehydroascorbate reductase [Aegilops tauschii]
A_99_P433182		0.0402145	0.0158336	-3.52602	-1.81804	3.52602		Rep: Blue copper protein - Zea mays (Maize), partial (85%) [TC391035]	gb|EMS49439,1| Blue copper protein [Triticum urartu]
A_99_P506462		0.0339595	0.0118972	-3.51709	-1.81438	3.51709			ref|XP_004239107,1| PREDICTED: uncharacterized protein At1g04910-like [Solanum lycopersicum]
A_99_P269621		0.01963	0.00359574	-3.51209	-1.81233	3.51209		Rep: Glutathione transferase - Triticum aestivum (Wheat), partial (91%) [TC375617]	gb|EMT30901,1| hypothetical protein F775_26086 [Aegilops tauschii]
A_99_P287126		0.0337094	0.011779	-3.51189	-1.81225	3.51189		Rep: Os04g0684900 protein - Oryza sativa subsp, japonica (Rice), partial (40%) [TC393322]	ref|XP_005650695,1| TPR-like protein [Coccomyxa subellipsoidea C-169] gb|EIE26151,1| TPR-like protein [Coccomyxa subellipsoidea C-169]
A_99_P359191		0.0190373	0.00344926	-3.50065	-1.80762	3.50065		Rep: Expressed protein - Oryza sativa subsp, japonica (Rice), partial (32%) [TC409407]	gb|AAN33000,1| alpha-tubulin 4, partial [Gossypium hirsutum]
A_99_P261801		0.0151869	0.00165107	-3.49989	-1.80731	3.49989		Rep: Phosphate translocator-like - Oryza sativa subsp, japonica (Rice), partial (90%) [TC377102]	ref|XP_002947569,1| hypothetical protein VOLCADRAFT_87820 [Volvox carteri f, nagariensis] gb|EFJ51617,1| hypothetical protein VOLCADRAFT_87820 [Volvox carteri f, nagariensis]
A_99_P016209		0.0151869	0.00167294	-3.49218	-1.80413	3.49218		Rep: Anthranilate phosphoribosyltransferase-like protein - Arabidopsis thaliana (Mouse-ear cress), partial (52%) [TC431733]	ref|XP_003563223,1| PREDICTED: tRNA dimethylallyltransferase 9-like [Brachypodium distachyon]
A_99_P252111		0.0319024	0.0107227	-3.49153	-1.80386	3.49153			ref|NP_001234258,1| potassium channel [Solanum lycopersicum] emb|CAA65254,1| potassium channel [Solanum lycopersicum]
A_99_P224741		0.0411354	0.0166466	-3.48504	-1.80117	3.48504		Rep: Monodehydroascorbate reductase - Oryza sativa subsp, japonica (Rice), partial (34%) [TC404007]	ref|XP_006351251,1| PREDICTED: zeatin O-glucosyltransferase-like [Solanum tuberosum]
A_99_P506377		0.0293908	0.0088208	-3.47227	-1.79588	3.47227		Rep: Aldose reductase - Zea mays (Maize), partial (64%) [TC434517]	ref|XP_004498652,1| PREDICTED: potassium channel AKT1-like isoform X2 [Cicer arietinum]
A_99_P327461		0.0316285	0.0104851	-3.46204	-1.79162	3.46204		Rep: PG1 - Hordeum vulgare (Barley), partial (11%) [TC432526]	gb|AAP46638,1| PG1 [Hordeum vulgare]
A_99_P563992		0.0360037	0.0134116	-3.43363	-1.77974	3.43363		Rep: Monodehydroascorbate reductase - Oryza sativa subsp, japonica (Rice), partial (37%) [TC407541]	gb|EMT04135,1| Monodehydroascorbate reductase [Aegilops tauschii]
A_99_P363086		0.041759	0.0170237	-3.43123	-1.77873	3.43123			emb|CAI93180,1| glycosyltransferase [Triticum aestivum]
A_99_P235196		0.0285883	0.00841001	-3.42294	-1.77524	3.42294		TSA: Triticum aestivum cultivar Bobwhite isotig15362,flagleaf mRNA sequence [HP624580]	gb|EMT13367,1| Putative aquaporin TIP2-2 [Aegilops tauschii]
A_99_P416737		0.0355875	0.0130907	-3.40984	-1.76971	3.40984			gb|EMS67452,1| Secologanin synthase [Triticum urartu]
A_99_P255246		0.0125509	0.000714006	-3.40418	-1.76731	3.40418		Rep: Os01g0559700 protein - Oryza sativa subsp, japonica (Rice), partial (46%) [TC445266]	N/A
A_99_P470817		0.00880151	0.000113585	-3.38711	-1.76006	3.38711			gb|EMS51759,1| Long-chain-alcohol oxidase FAO2 [Triticum urartu]
A_99_P497832		0.0198594	0.00368713	-3.37221	-1.75369	3.37221			ref|XP_003523134,1| PREDICTED: uncharacterized protein LOC100775818 [Glycine max]
A_99_P225476		0.0127836	0.000835009	-3.3496	-1.74399	3.3496			emb|CAA71053,1| pSBGer4 [Triticum aestivum]
A_99_P456357		0.0292826	0.00871628	-3.34842	-1.74348	3.34842		TSA: Triticum aestivum cultivar Bobwhite isotig15362,flagleaf mRNA sequence [HP624580]	gb|EMT13367,1| Putative aquaporin TIP2-2 [Aegilops tauschii]
A_99_P235241		0.0262118	0.00692611	-3.31369	-1.72844	3.31369			gb|EMT13367,1| Putative aquaporin TIP2-2 [Aegilops tauschii]
A_99_P532142		0.0250446	0.00633284	-3.31063	-1.7271	3.31063		Rep: Tegument phosphoprotein VP13/14 - Cercopithecine herpesvirus 2, partial (6%) [TC440841]	ref|XP_004954068,1| PREDICTED: putative transcription elongation factor SPT5 homolog 1-like [Setaria italica]
A_99_P245036		0.0166121	0.0025525	-3.29953	-1.72226	3.29953			ref|XP_002879389,1| ent-kaurenoic acid hydroxylase [Arabidopsis lyrata subsp, lyrata] gb|EFH55648,1| ent-kaurenoic acid hydroxylase [Arabidopsis lyrata subsp, lyrata]
A_99_P341521		0.0166121	0.00258174	-3.29841	-1.72177	3.29841		Rep: PREDICTED: keratin 3 - Pan troglodytes, partial (5%) [TC414666]	ref|XP_006282175,1| hypothetical protein CARUB_v10028437mg [Capsella rubella] gb|EOA15073,1| hypothetical protein CARUB_v10028437mg [Capsella rubella]
A_99_P228406		0.0184883	0.00326697	-3.28201	-1.71458	3.28201		Rep: Glutathione transferase - Triticum aestivum (Wheat), partial (63%) [TC426474]	ref|XP_003638644,1| hypothetical protein MTR_138s0042 [Medicago truncatula] gb|AES85782,1| hypothetical protein MTR_138s0042 [Medicago truncatula]
A_99_P360906		0.0240011	0.00574641	-3.26261	-1.70603	3.26261		Rep: 3'-N-debenzoyltaxol N-benzoyltransferase-like - Oryza sativa subsp, japonica (Rice), partial (6%) [TC436128]	emb|CAA52158,1| alpha tubulin [Zea mays]
A_99_P201241		0.0125509	0.000761147	-3.24808	-1.69959	3.24808		FGAS029692 Triticum aestivum FGAS: Library 6 CAP GATE 1 Triticum aestivum cDNA, mRNA sequence [CK217690]	gb|EMT04963,1| hypothetical protein F775_27729 [Aegilops tauschii]
A_99_P523067		0.00880151	0.000161495	-3.22504	-1.68932	3.22504		FGAS074145 Triticum aestivum FGAS: Library 2 Gate 3 Triticum aestivum cDNA, mRNA sequence [CV779736]	dbj|BAK03654,1| predicted protein [Hordeum vulgare subsp, vulgare] dbj|BAK08228,1| predicted protein [Hordeum vulgare subsp, vulgare]
A_99_P500847		0.0284013	0.00831909	-3.22251	-1.68818	3.22251		Rep: ER33 protein - Solanum lycopersicum (Tomato) (Lycopersicon esculentum), partial (63%) [TC432075]	tpg|DAA37165,1| TPA_ putative HLH DNA-binding domain superfamily protein isoform 1 [Zea mays] tpg|DAA37166,1| TPA_ putative HLH DNA-binding domain superfamily protein isoform 2 [Zea mays] Length=126
A_99_P255001		0.0154903	0.00202234	-3.21827	-1.68628	3.21827		Rep: Hin1-like protein - Solanum tuberosum (Potato), partial (26%) [TC415786]	gb|AAK26123,1|AC084406_6 putative ubiquitin-conjugating protein [Oryza sativa Japonica Group] gb|AAT85266,1| ubiquitin-conjugating enzyme family protein [Oryza sativa Japonica Group]
A_99_P235486		0.0227084	0.00517694	-3.19976	-1.67796	3.19976		Rep: Phenylalanine ammonia-lyase - Triticum aestivum (Wheat), partial (27%) [TC407651]	gb|EMT33318,1| Phenylalanine ammonia-lyase [Aegilops tauschii]
A_99_P253331		0.0493288	0.0223717	-3.19835	-1.67733	3.19835			dbj|BAJ86281,1| predicted protein [Hordeum vulgare subsp, vulgare]
A_99_P481797		0.0255813	0.00661132	-3.19762	-1.677	3.19762		Rep: Protein HVA22 - Hordeum vulgare (Barley), partial (64%) [TC423074]	gb|EMT16019,1| hypothetical protein F775_43960 [Aegilops tauschii]
A_99_P167534		0.0310037	0.0101082	-3.19493	-1.67578	3.19493			gb|EMS53888,1| Pyruvate dehydrogenase E1 component subunit alpha-2, mitochondrial [Triticum urartu]
A_99_P409937		0.0320356	0.0108274	-3.18761	-1.67248	3.18761		TSA: Triticum aestivum cultivar Bobwhite isotig21133,flagleaf mRNA sequence [HP630364]	ref|XP_003516395,1| PREDICTED: probable inactive leucine-rich repeat receptor-like protein kinase At1g66830-like [Glycine max]
A_99_P261016		0.0184454	0.00324103	-3.18546	-1.6715	3.18546		Triticum aestivum cDNA, clone: WT002_B03, cultivar: Chinese Spring [AK331666]	gb|EMS58358,1| Glutamate dehydrogenase 2 [Triticum urartu]
A_99_P313026		0.0154903	0.00189519	-3.18178	-1.66983	3.18178			ref|XP_002950770,1| hypothetical protein VOLCADRAFT_91294 [Volvox carteri f, nagariensis] gb|EFJ48085,1| hypothetical protein VOLCADRAFT_91294 [Volvox carteri f, nagariensis]
A_99_P251936		0.00880151	0.000228134	-3.17492	-1.66672	3.17492		Rep: Os05g0407100 protein - Oryza sativa subsp, japonica (Rice), partial (71%) [TC420249]	dbj|BAK03654,1| predicted protein [Hordeum vulgare subsp, vulgare] dbj|BAK08228,1| predicted protein [Hordeum vulgare subsp, vulgare]
A_99_P292611		0.0383378	0.0148275	-3.16538	-1.66238	3.16538			gb|EYU26596,1| hypothetical protein MIMGU_mgv1a007670mg [Mimulus guttatus]
A_99_P261796		0.0188471	0.00337727	-3.16522	-1.66231	3.16522			gb|ABX45922,1| xanthine dehydrogenase [Pereskia portulacifolia]
A_99_P428987		0.0159307	0.00218859	-3.15656	-1.65835	3.15656		TSA: Triticum aestivum contig16929,TraeRec mRNA sequence [JP221722]	gb|EMT29648,1| hypothetical protein F775_07929 [Aegilops tauschii]
A_99_P228341		0.0229841	0.0053516	-3.13785	-1.64978	3.13785		Rep: Glutathione transferase - Triticum aestivum (Wheat), complete [TC397554]	emb|CAC94005,1| glutathione transferase [Triticum aestivum] gb|EMT19277,1| hypothetical protein F775_26875 [Aegilops tauschii]
A_99_P280431		0.0304532	0.00947219	-3.13523	-1.64857	3.13523			ref|NP_001142087,1| uncharacterized protein LOC100274249 [Zea mays] gb|ACF87608,1| unknown [Zea mays] gb|AFW64197,1| hypothetical protein ZEAMMB73_640112 [Zea mays]
A_99_P228471		0.0223212	0.00488947	-3.11861	-1.6409	3.11861			emb|CAC94005,1| glutathione transferase [Triticum aestivum] gb|EMT19277,1| hypothetical protein F775_26875 [Aegilops tauschii]
A_99_P497877		0.0261569	0.00687127	-3.10788	-1.63593	3.10788		Rep: Os04g0684900 protein - Oryza sativa subsp, japonica (Rice), partial (12%) [TC430778]	dbj|BAJ97724,1| predicted protein [Hordeum vulgare subsp, vulgare]
A_99_P261006		0.0198594	0.00368719	-3.09217	-1.62862	3.09217		Triticum aestivum cDNA, clone: WT002_B03, cultivar: Chinese Spring [AK331666]	gb|EMT15031,1| Glutamate dehydrogenase 2 [Aegilops tauschii]
A_99_P260256		0.0149343	0.00143471	-3.08482	-1.62519	3.08482		Rep: Os05g0595300 protein - Oryza sativa subsp, japonica (Rice), partial (19%) [TC399273]	gb|AEA38296,1| NADH dehydrogenase subunit F [Cratoxylum formosum]
A_99_P505632		0.0319024	0.0106648	-3.07377	-1.62001	3.07377		Rep: Pollen oleosin - Lilium longiflorum (Trumpet lily), partial (40%) [TC385078]	###############################################################################################################################################################################################################################################################
A_99_P400397		0.00880151	0.000141215	-3.07234	-1.61934	3.07234		Rep: ABA responsive element binding factor 2 - Hordeum vulgare var, distichum (Two-rowed barley), partial (34%) [TC397949]	ref|XP_007215358,1| hypothetical protein PRUPE_ppa005543mg [Prunus persica] gb|EMJ16557,1| hypothetical protein PRUPE_ppa005543mg [Prunus persica]
A_99_P473602		0.0154903	0.00205552	-3.03863	-1.60342	3.03863		Rep: NADPH:quinone oxidoreductase - Arabidopsis thaliana (Mouse-ear cress), partial (26%) [TC418644]	gb|EMT08688,1| hypothetical protein F775_21930 [Aegilops tauschii]
A_99_P543192		0.0230593	0.00539465	-3.02554	-1.59719	3.02554			dbj|BAE71292,1| putative ABC transporter like ATPase [Trifolium pratense]
A_99_P369287		0.0327861	0.0112442	-3.02493	-1.5969	3.02493		Rep: Dehydration responsive element-binding protein 1 - Glycine soja (Wild soybean), partial (41%) [TC429879]	emb|CAN66638,1| hypothetical protein VITISV_018029 [Vitis vinifera]
A_99_P093750		0.0220704	0.00472387	-3.00073	-1.58531	3.00073		FGAS083158 Triticum aestivum FGAS: Library 6 CAP GATE 1 Triticum aestivum cDNA, mRNA sequence [DR737941]	gb|EMS65382,1| hypothetical protein TRIUR3_05744 [Triticum urartu]
A_99_P194348		0.0306127	0.00961504	-2.99349	-1.58183	2.99349			gb|EMS57101,1| UDP-glycosyltransferase 73C7 [Triticum urartu]
A_99_P218741		0.0323881	0.0110596	-2.99279	-1.58149	2.99279			gb|ACJ05643,1| ferritin 1A [Triticum aestivum] gb|ACJ05646,1| ferritin 1A [Triticum aestivum] gb|ACJ05650,1| ferritin 1C [Triticum aestivum]
A_99_P228336		0.020185	0.00383722	-2.99236	-1.58128	2.99236			dbj|BAE71292,1| putative ABC transporter like ATPase [Trifolium pratense]
A_99_P018584		0.0341306	0.0120403	-2.99088	-1.58057	2.99088		Rep: Os03g0803600 protein - Oryza sativa subsp, japonica (Rice), partial (22%) [TC383926]	gb|EMS67280,1| putative beta-1,3-galactosyltransferase 19 [Triticum urartu]
A_99_P320146		0.0225474	0.00504448	-2.97821	-1.57445	2.97821			N/A
A_99_P262616		0.0370201	0.0140783	-2.97066	-1.57079	2.97066			gb|AAM22755,1| sucrose synthase [Deschampsia antarctica]
A_99_P295356		0.0127836	0.000870987	-2.96479	-1.56793	2.96479			ref|XP_007214877,1| hypothetical protein PRUPE_ppa026885mg, partial [Prunus persica] gb|EMJ16076,1| hypothetical protein PRUPE_ppa026885mg, partial [Prunus persica]
A_99_P459552		0.0250058	0.00627732	-2.95988	-1.56554	2.95988		Triticum aestivum cDNA, clone: WT012_N15, cultivar: Chinese Spring [AK335416]	ref|XP_006432207,1| hypothetical protein CICLE_v10003965mg [Citrus clementina] gb|ESR45447,1| hypothetical protein CICLE_v10003965mg [Citrus clementina]
A_99_P533467		0.0406414	0.0163253	-2.94924	-1.56034	2.94924		Rep: Serine/arginine repetitive matrix 1 - Danio rerio (Zebrafish) (Brachydanio rerio), partial (4%) [TC445970]	gb|EMT07122,1| hypothetical protein F775_10211 [Aegilops tauschii]
A_99_P444237		0.0313523	0.0103467	-2.94219	-1.55689	2.94219		Rep: Chromosome chr1 scaffold_136, whole genome shotgun sequence - Vitis vinifera (Grape), partial (97%) [TC399532]	gb|EMS45275,1| hypothetical protein TRIUR3_20548 [Triticum urartu]
A_99_P229836		0.029678	0.00904908	-2.94094	-1.55628	2.94094		Rep: Arginine decarboxylase - Oryza sativa subsp, japonica (Rice), partial (22%) [TC426758]	gb|EMS56348,1| Arginine decarboxylase 1 [Triticum urartu]
A_99_P071560		0.0381911	0.0147518	-2.92413	-1.54801	2.92413		Triticum aestivum clone wlm96,pk030,e11:fis, full insert mRNA sequence [BT009376]	ref|XP_004981325,1| PREDICTED: adenylate isopentenyltransferase 5, chloroplastic-like [Setaria italica]
A_99_P497837		0.0355598	0.0130628	-2.92355	-1.54772	2.92355			ref|XP_001702930,1| predicted protein [Chlamydomonas reinhardtii] gb|EDO96783,1| predicted protein [Chlamydomonas reinhardtii]
A_99_P153542		0.0212422	0.00428055	-2.91616	-1.54407	2.91616		CJ907261 Y, Ogihara unpublished cDNA library, whthkles Triticum aestivum cDNA clone whthkles6a02 5', mRNA sequence [CJ907261]	gb|EMT32349,1| Inositol-tetrakisphosphate 1-kinase 1 [Aegilops tauschii]
A_99_P260276		0.0127836	0.000971353	-2.90935	-1.5407	2.90935		Rep: Os05g0595300 protein - Oryza sativa subsp, japonica (Rice), partial (21%) [TC443262]	gb|AEA38296,1| NADH dehydrogenase subunit F [Cratoxylum formosum]
A_99_P200891		0.0343522	0.0122964	-2.90681	-1.53944	2.90681			gb|EMT04963,1| hypothetical protein F775_27729 [Aegilops tauschii]
A_99_P412202		0.0252088	0.0064113	-2.90068	-1.53639	2.90068		FGAS014700 Triticum aestivum FGAS: Library 4 Gate 8 Triticum aestivum cDNA, mRNA sequence [CK162115]	N/A
A_99_P229841		0.0344633	0.012496	-2.84269	-1.50726	2.84269		Rep: Arginine decarboxylase - Oryza sativa subsp, japonica (Rice), partial (10%) [TC428833]	ref|XP_004138500,1| PREDICTED: signal peptide peptidase-like 4-like [Cucumis sativus] ref|XP_004165135,1| PREDICTED: signal peptide peptidase-like 4-like [Cucumis sativus]
A_99_P228326		0.0182468	0.00319594	-2.83998	-1.50588	2.83998			N/A
A_99_P531167		0.0216637	0.00448586	-2.79244	-1.48153	2.79244		Rep: NADPH:quinone oxidoreductase - Arabidopsis thaliana (Mouse-ear cress), partial (52%) [TC421143]	ref|XP_002522002,1| metalloprotease m41 ftsh, putative [Ricinus communis] gb|EEF40406,1| metalloprotease m41 ftsh, putative [Ricinus communis]
A_99_P466642		0.0164557	0.00236054	-2.77525	-1.47262	2.77525		TSA: Triticum aestivum cultivar Bobwhite isotig02334,flagleaf mRNA sequence [HP611478]	gb|EMS63772,1| hypothetical protein TRIUR3_00247 [Triticum urartu]
A_99_P364466		0.0226825	0.00512961	-2.76937	-1.46956	2.76937			ref|XP_004980907,1| PREDICTED: putative disease resistance protein At3g14460-like [Setaria italica]
A_99_P199641		0.0111988	0.000452833	-2.76824	-1.46897	2.76824			dbj|BAJ85118,1| predicted protein [Hordeum vulgare subsp, vulgare]
A_99_P287256		0.0154903	0.00187908	-2.75686	-1.46303	2.75686		Rep: Predicted protein - Physcomitrella patens subsp, patens, partial (72%) [TC397960]	ref|XP_007210720,1| hypothetical protein PRUPE_ppa022610mg [Prunus persica] gb|EMJ11919,1| hypothetical protein PRUPE_ppa022610mg [Prunus persica]
A_99_P228476		0.0343522	0.0123455	-2.74126	-1.45484	2.74126	gstu3	FGAS022697 Triticum aestivum FGAS: Library 5 GATE 7 Triticum aestivum cDNA, mRNA sequence [CK210870]	gb|EMT08212,1| hypothetical protein F775_27020 [Aegilops tauschii]
A_99_P061018		0.0493288	0.0223662	-2.72114	-1.44421	2.72114		Triticum aestivum clone wlm96,pk028,k4:fis, full insert mRNA sequence [BT009372]	gb|EMT05381,1| Cytokinin-O-glucosyltransferase 1 [Aegilops tauschii]
A_99_P255771		0.0344633	0.0125399	-2.70773	-1.43708	2.70773			N/A
A_99_P431857		0.0147084	0.00137158	-2.69248	-1.42894	2.69248		Rep: Chromosome undetermined scaffold_222, whole genome shotgun sequence - Vitis vinifera (Grape), partial (28%) [TC390010]	ref|XP_007214877,1| hypothetical protein PRUPE_ppa026885mg, partial [Prunus persica] gb|EMJ16076,1| hypothetical protein PRUPE_ppa026885mg, partial [Prunus persica]
A_99_P004906		0.0262118	0.00695415	-2.67461	-1.41933	2.67461		Triticum aestivum clone wlmk8,pk0004,f6:fis, full insert mRNA sequence [BT009444]	ref|XP_004955702,1| PREDICTED: uncharacterized protein LOC101754135 isoform X1 [Setaria italica]
A_99_P210296		0.0347034	0.0126791	-2.66879	-1.41619	2.66879		Rep: Chromosome chr8 scaffold_34, whole genome shotgun sequence - Vitis vinifera (Grape), partial (57%) [TC394857]	dbj|BAJ94631,1| predicted protein [Hordeum vulgare subsp, vulgare]
A_99_P202636		0.0144587	0.00132424	-2.66651	-1.41495	2.66651		Rep: HvPIP2;1 protein - Hordeum vulgare (Barley), partial (39%) [TC389464]	gb|EAZ23886,1| hypothetical protein OsJ_07605 [Oryza sativa Japonica Group]
A_99_P505547		0.0252088	0.00642225	-2.66044	-1.41166	2.66044		Rep: Chromosome chr16 scaffold_10, whole genome shotgun sequence - Vitis vinifera (Grape), partial (48%) [TC434140]	ref|XP_003077978,1| unnamed protein product [Ostreococcus tauri] emb|CAL52718,1| unnamed protein product [Ostreococcus tauri]
A_99_P168849		0.0258275	0.00672363	-2.65595	-1.40923	2.65595	Waox1c	Triticum aestivum cDNA, clone: WT004_F10, cultivar: Chinese Spring [AK332579]	ref|XP_003593412,1| Serine/threonine protein kinase [Medicago truncatula] gb|AES63663,1| Serine/threonine protein kinase [Medicago truncatula]
A_99_P424127		0.0473732	0.0207744	-2.65303	-1.40764	2.65303		Rep: Ferritin - Triticum monococcum (Einkorn wheat) (Small spelt), partial (93%) [TC384023]	ref|NP_001175444,1| Os08g0224000 [Oryza sativa Japonica Group] dbj|BAH94172,1| Os08g0224000 [Oryza sativa Japonica Group]
A_99_P470082		0.0309373	0.00977858	-2.63256	-1.39647	2.63256		Rep: Os01g0266400 protein - Oryza sativa subsp, japonica (Rice), partial (31%) [TC416614]	gb|EMS48634,1| hypothetical protein TRIUR3_18743 [Triticum urartu]
A_99_P001246		0.0147084	0.00137639	-2.63196	-1.39613	2.63196		Rep: Pyrroline-5-carboxylate reductase - Triticum aestivum (Wheat), partial (33%) [TC436197]	gb|AAO32084,1| pyrroline-5-carboxylate reductase [Hordeum vulgare subsp, vulgare]
A_99_P249276		0.0220704	0.00471919	-2.60165	-1.37943	2.60165			ref|NP_001046117,2| Os02g0185900 [Oryza sativa Japonica Group] dbj|BAF08031,2| Os02g0185900, partial [Oryza sativa Japonica Group]
A_99_P458357		0.0126712	0.000784966	-2.60144	-1.37931	2.60144		Rep: NAC transcription factor - Hordeum vulgare var, distichum (Two-rowed barley), partial (98%) [TC409768]	emb|CBI18492,3| unnamed protein product [Vitis vinifera]
A_99_P289096		0.0240011	0.00573846	-2.59408	-1.37522	2.59408		Rep: 3'-N-debenzoyltaxol N-benzoyltransferase-like - Oryza sativa subsp, japonica (Rice), partial (15%) [TC430970]	gb|ACF21006,1| putrescine N-methyltransferase 2 [Anisodus acutangulus]
A_99_P051816		0.022932	0.00526214	-2.5871	-1.37133	2.5871			dbj|BAK01586,1| predicted protein [Hordeum vulgare subsp, vulgare]
A_99_P169834		0.00903718	0.000283396	-2.58087	-1.36786	2.58087			N/A
A_99_P325336		0.0178218	0.00299839	-2.57644	-1.36538	2.57644		Rep: Glucose-6-phosphate 1-dehydrogenase - Vitis vinifera (Grape), partial (24%) [TC404131]	ref|XP_002453446,1| hypothetical protein SORBIDRAFT_04g006090 [Sorghum bicolor] gb|EES06422,1| hypothetical protein SORBIDRAFT_04g006090 [Sorghum bicolor]
A_99_P344516		0.0135537	0.00112897	-2.56878	-1.36109	2.56878		TSA: Triticum aestivum cultivar Bobwhite isotig12904,flagleaf mRNA sequence [HP622116]	gb|EMS59049,1| hypothetical protein TRIUR3_08315 [Triticum urartu]
A_99_P327226		0.0218407	0.00458775	-2.55853	-1.35531	2.55853		Triticum aestivum cDNA, clone: WT004_A11, cultivar: Chinese Spring [AK332455]	gb|EMT17209,1| Sugar phosphate exchanger 2 [Aegilops tauschii]
A_99_P297916		0.0471052	0.0205049	-2.54077	-1.34526	2.54077		Triticum aestivum cDNA, clone: WT009_J20, cultivar: Chinese Spring [AK334420]	gb|EMT31983,1| hypothetical protein F775_29312 [Aegilops tauschii]
A_99_P434437		0.0191137	0.00347262	-2.52453	-1.33601	2.52453			N/A
A_99_P379257		0.0483325	0.0215078	-2.52437	-1.33593	2.52437		Rep: Zinc transporter protein ZIP7 - Hordeum vulgare (Barley), partial (26%) [TC409211]	dbj|BAK03160,1| predicted protein [Hordeum vulgare subsp, vulgare]
A_99_P510242		0.0462788	0.0198568	-2.52381	-1.3356	2.52381		Rep: Pyrroline-5-carboxylate reductase - Triticum aestivum (Wheat), partial (33%) [TC436197]	gb|EMT07140,1| Pyrroline-5-carboxylate reductase [Aegilops tauschii]
A_99_P556462		0.0398035	0.0156123	-2.50202	-1.3231	2.50202		TSA: Triticum aestivum cultivar Bobwhite isotig02334,flagleaf mRNA sequence [HP611478]	gb|EMS63772,1| hypothetical protein TRIUR3_00247 [Triticum urartu]
A_99_P270386		0.0127836	0.000986582	-2.50105	-1.32254	2.50105		Rep: beta-galactosidase - Entamoeba histolytica HM-1:IMSS, partial (17%) [TC450414]	ref|XP_002956407,1| hypothetical protein VOLCADRAFT_107185 [Volvox carteri f, nagariensis] gb|EFJ42551,1| hypothetical protein VOLCADRAFT_107185 [Volvox carteri f, nagariensis]
A_99_P532197		0.0154903	0.00188566	-2.4996	-1.3217	2.4996		Rep: Os07g0663500 protein - Oryza sativa subsp, japonica (Rice), partial (57%) [TC445401]	gb|EMS55727,1| Sex determination protein tasselseed-2 [Triticum urartu]
A_99_P485072		0.0208015	0.00414167	-2.48415	-1.31275	2.48415		Rep: Ferritin - Triticum aestivum (Wheat), partial (46%) [TC424752]	gb|AFK48671,1| unknown [Lotus japonicus]
A_99_P389527		0.00523595	2.34477e-05	-2.48317	-1.31218	2.48317			gb|EMS63610,1| ABSCISIC ACID-INSENSITIVE 5-like protein 5 [Triticum urartu]
A_99_P202701		0.0331309	0.0114429	-2.47012	-1.30458	2.47012			gb|AAP54035,1| hypothetical protein LOC_Os10g31280 [Oryza sativa Japonica Group]
A_99_P365426		0.0213152	0.00435005	-2.46985	-1.30443	2.46985			gb|AFK38362,1| unknown [Lotus japonicus]
A_99_P431532		0.0343447	0.0122574	-2.4682	-1.30346	2.4682		Rep: CBL-interacting protein kinase - Hordeum brevisubulatum, partial (63%) [TC389753]	emb|CAN61570,1| hypothetical protein VITISV_037260 [Vitis vinifera]
A_99_P256571		0.0294269	0.00886176	-2.45945	-1.29834	2.45945		Rep: Chromosome chr8 scaffold_41, whole genome shotgun sequence - Vitis vinifera (Grape), partial (26%) [TC371529]	gb|EMS65761,1| ABC transporter G family member 22 [Triticum urartu]
A_99_P322201		0.0362953	0.0136033	-2.43383	-1.28323	2.43383		TSA: Triticum aestivum cultivar Bobwhite isotig28763,flagleaf mRNA sequence [HP637968]	gb|EMT12556,1| Putative serine/threonine-protein kinase NAK [Aegilops tauschii]
A_99_P260106		0.0135537	0.00116387	-2.4211	-1.27566	2.4211			###############################################################################################################################################################################################################################################################
A_99_P317096		0.0378408	0.0145788	-2.38535	-1.2542	2.38535		Rep: Os05g0537400 protein - Oryza sativa subsp, japonica (Rice), partial (97%) [TC459578]	gb|EMT29148,1| Putative protein phosphatase 2C 50 [Aegilops tauschii]
A_99_P218666		0.0248395	0.00617377	-2.37439	-1.24756	2.37439			ref|XP_004138675,1| PREDICTED: pre-mRNA-processing ATP-dependent RNA helicase prp5-like [Cucumis sativus] ref|XP_004165882,1| PREDICTED: pre-mRNA-processing ATP-dependent RNA helicase prp5-like [Cucumis sativus]
A_99_P521867		0.0240464	0.0058171	-2.35921	-1.23831	2.35921		Rep: Expressed protein - Oryza sativa subsp, japonica (Rice), partial (36%) [TC429898]	gb|EYU22863,1| hypothetical protein MIMGU_mgv1a023262mg [Mimulus guttatus]
A_99_P302322		0.0375472	0.0144283	-2.35639	-1.23658	2.35639		Triticum aestivum cDNA, clone: SET5_N09, cultivar: Chinese Spring [AK331001]	dbj|BAK04136,1| predicted protein [Hordeum vulgare subsp, vulgare]
A_99_P167489		0.0111988	0.000473313	-2.35414	-1.2352	2.35414			gb|EMS63610,1| ABSCISIC ACID-INSENSITIVE 5-like protein 5 [Triticum urartu]
A_99_P428397		0.021645	0.00446975	-2.34729	-1.231	2.34729			ref|XP_006659498,1| PREDICTED: patatin-T5-like [Oryza brachyantha]
A_99_P537337		0.0473732	0.0207672	-2.33331	-1.22238	2.33331		WHE1213_E01_I01ZS Wheat etiolated seedling root cDNA library Triticum aestivum cDNA clone WHE1213_E01_I01, mRNA sequence [BE405360]	dbj|BAJ97919,1| predicted protein [Hordeum vulgare subsp, vulgare]
A_99_P227896		0.0127836	0.000941094	-2.32189	-1.2153	2.32189		Rep: Cytochrome c oxidase subunit 1 - Crangon communis, partial (8%) [TC412464]	gb|EMS59614,1| Transcription factor bHLH47 [Triticum urartu]
A_99_P386582		0.0166121	0.00257328	-2.32149	-1.21505	2.32149		Triticum aestivum cDNA, clone: WT006_F16, cultivar: Chinese Spring [AK333387]	ref|XP_002303620,1| hypothetical protein POPTR_0003s13510g [Populus trichocarpa] gb|EEE78599,1| hypothetical protein POPTR_0003s13510g [Populus trichocarpa]
A_99_P335036		0.020185	0.00382696	-2.31066	-1.20831	2.31066		Rep: Chromosome chr6 scaffold_3, whole genome shotgun sequence - Vitis vinifera (Grape), partial (12%) [TC400164]	gb|EMT06316,1| Glucan endo-1,3-beta-glucosidase 14 [Aegilops tauschii]
A_99_P232376		0.0113247	0.000507327	-2.30635	-1.20561	2.30635	NAC6	Triticum aestivum cDNA, clone: WT004_D20, cultivar: Chinese Spring [AK332540]	emb|CBI18492,3| unnamed protein product [Vitis vinifera]
A_99_P354511		0.0164557	0.00235068	-2.30535	-1.20499	2.30535			emb|CAI93180,1| glycosyltransferase [Triticum aestivum]
A_99_P260101		0.0151869	0.00168142	-2.30164	-1.20266	2.30164			ref|XP_001775577,1| predicted protein [Physcomitrella patens] gb|EDQ59660,1| predicted protein [Physcomitrella patens]
A_99_P308676		0.0467425	0.0201721	-2.29634	-1.19933	2.29634			N/A
A_99_P487262		0.0221812	0.00478782	-2.28926	-1.19488	2.28926		TSA: Triticum aestivum cultivar Bobwhite isotig02334,flagleaf mRNA sequence [HP611478]	gb|EMS63772,1| hypothetical protein TRIUR3_00247 [Triticum urartu]
A_99_P051526		0.026114	0.00682422	-2.2889	-1.19466	2.2889		CJ799742 Y, Ogihara unpublished cDNA library, whsct Triticum aestivum cDNA clone whsct18b01 5', mRNA sequence [CJ799742]	gb|EMS62197,1| Phenylalanine ammonia-lyase [Triticum urartu]
A_99_P313596		0.0284013	0.00831541	-2.28881	-1.1946	2.28881			emb|CAI93180,1| glycosyltransferase [Triticum aestivum]
A_99_P366737		0.0198594	0.00367358	-2.2786	-1.18815	2.2786			gb|EMS62197,1| Phenylalanine ammonia-lyase [Triticum urartu]
A_99_P160482		0.0316448	0.010522	-2.26055	-1.17667	2.26055		CJ692289 Y,Ogihara unpublished cDNA library Wh_RDr Triticum aestivum cDNA clone whrd8l02 5', mRNA sequence [CJ692289]	N/A
A_99_P512412		0.0166121	0.00248159	-2.25971	-1.17614	2.25971		Rep: Hydroxyproline-rich glycoprotein - Medicago truncatula (Barrel medic), partial (29%) [TC437128]	dbj|BAK00377,1| predicted protein [Hordeum vulgare subsp, vulgare]
A_99_P325311		0.0414377	0.0168161	-2.25063	-1.17033	2.25063			gb|EMT01021,1| hypothetical protein F775_16953 [Aegilops tauschii]
A_99_P476422		0.021645	0.00447122	-2.24584	-1.16726	2.24584		Rep: Hin1-like protein - Solanum tuberosum (Potato), partial (28%) [TC420203]	gb|AAK26123,1|AC084406_6 putative ubiquitin-conjugating protein [Oryza sativa Japonica Group] gb|AAT85266,1| ubiquitin-conjugating enzyme family protein [Oryza sativa Japonica Group]
A_99_P325881		0.0103115	0.00036955	-2.24247	-1.16509	2.24247		TSA: Triticum aestivum contig31250,TraeRec mRNA sequence [JP234453]	gb|EMS60544,1| ABC transporter C family member 9 [Triticum urartu]
A_99_P270391		0.00880151	0.000267243	-2.23809	-1.16227	2.23809		Rep: Expressed protein - Arabidopsis thaliana (Mouse-ear cress), partial (18%) [TC391735]	ref|XP_003570270,1| PREDICTED: vacuolar amino acid transporter 1-like isoform 1 [Brachypodium distachyon]
A_99_P205981		0.0426749	0.0175883	-2.23785	-1.16212	2.23785		TSA: Triticum aestivum contig17591,TraeRec mRNA sequence [JP222311]	emb|CAN81262,1| hypothetical protein VITISV_019711 [Vitis vinifera]
A_99_P257451		0.0250058	0.00630804	-2.23643	-1.1612	2.23643			ref|XP_007152074,1| hypothetical protein PHAVU_004G099900g [Phaseolus vulgaris] gb|ESW24068,1| hypothetical protein PHAVU_004G099900g [Phaseolus vulgaris]
A_99_P469052		0.0168988	0.00274216	-2.23296	-1.15896	2.23296		Triticum aestivum cDNA, clone: WT004_G13, cultivar: Chinese Spring [AK332605]	gb|EMS63034,1| Formate dehydrogenase, mitochondrial [Triticum urartu]
A_99_P461822		0.0311358	0.0101668	-2.23274	-1.15881	2.23274			N/A
A_99_P275306		0.0343522	0.0123821	-2.23155	-1.15804	2.23155		TSA: Triticum aestivum cultivar Bobwhite isotig02339,flagleaf mRNA sequence [HP611483]	gb|EMS63772,1| hypothetical protein TRIUR3_00247 [Triticum urartu]
A_99_P423137		0.0127953	0.000999932	-2.22507	-1.15385	2.22507			gb|EMT08212,1| hypothetical protein F775_27020 [Aegilops tauschii]
A_99_P172374		0.0151091	0.00159419	-2.22453	-1.1535	2.22453		Rep: Uroporphyrin-III C-methyltransferase - Brucella ovis (strain ATCC 25840 / 63/290 / NCTC 10512), partial (10%) [TC422328]	ref|XP_006280247,1| hypothetical protein CARUB_v10026161mg [Capsella rubella] gb|EOA13145,1| hypothetical protein CARUB_v10026161mg [Capsella rubella]
A_99_P537307		0.00523595	9.20729e-06	-2.21899	-1.1499	2.21899		Rep: Os04g0679800 protein - Oryza sativa subsp, japonica (Rice), partial (97%) [TC390586]	gb|EMT30862,1| RING finger protein 141 [Aegilops tauschii]
A_99_P302326		0.0369554	0.0139985	-2.21814	-1.14935	2.21814		Triticum aestivum cDNA, clone: SET5_N09, cultivar: Chinese Spring [AK331001]	ref|XP_003058981,1| predicted protein [Micromonas pusilla CCMP1545] gb|EEH57436,1| predicted protein [Micromonas pusilla CCMP1545]
A_99_P355211		0.0309593	0.0099333	-2.21415	-1.14676	2.21415			gb|EMS64170,1| hypothetical protein TRIUR3_01996 [Triticum urartu]
A_99_P206341		0.0309867	0.0100762	-2.20226	-1.13899	2.20226		TSA: Triticum aestivum contig17591,TraeRec mRNA sequence [JP222311]	ref|XP_002533721,1| purine permease, putative [Ricinus communis] gb|EEF28666,1| purine permease, putative [Ricinus communis]
A_99_P504797		0.00880151	0.000121179	-2.20205	-1.13885	2.20205			gb|EMT22452,1| Protein TRANSPARENT TESTA 12 [Aegilops tauschii]
A_99_P272971		0.00910672	0.000295511	-2.19968	-1.13729	2.19968		Rep: Transcription factor Myb2 - Triticum aestivum (Wheat), partial (79%) [TC384792]	gb|AAT37168,1| transcription factor Myb2 [Triticum aestivum]
A_99_P453952		0.00880151	0.000138968	-2.19499	-1.13421	2.19499	Tamyb7	FGAS021512 Triticum aestivum FGAS: Library 5 GATE 7 Triticum aestivum cDNA, mRNA sequence [CK209733]	dbj|BAE80457,1| myb-related protein [Triticum aestivum]
A_99_P260096		0.0135424	0.00111224	-2.18227	-1.12583	2.18227	LOC100286395	Triticum aestivum putative GA receptor GID1 mRNA, partial cds [EU417816]	ref|XP_001777613,1| predicted protein [Physcomitrella patens] gb|EDQ57515,1| predicted protein [Physcomitrella patens]
A_99_P226261		0.0154903	0.00193759	-2.18199	-1.12564	2.18199		Rep: Formate dehydrogenase, mitochondrial precursor - Hordeum vulgare (Barley), complete [TC379352]	gb|EMS63034,1| Formate dehydrogenase, mitochondrial [Triticum urartu]
A_99_P422322		0.0154903	0.00205308	-2.17836	-1.12324	2.17836		Rep: GID1-like gibberellin receptor - Hordeum vulgare (Barley), partial (42%) [TC382522]	N/A
A_99_P449692		0.021735	0.0045439	-2.1724	-1.11929	2.1724		Rep: 17,4 kDa class I heat shock protein 3 - Oryza sativa subsp, japonica (Rice), partial (94%) [TC403468]	gb|AAB59350,1| heat shock protein 16,9, partial [Triticum aestivum]
A_99_P636916		0.0291885	0.00861562	-2.16426	-1.11387	2.16426	CCoAMT	FGAS014712 Triticum aestivum FGAS: Library 4 Gate 8 Triticum aestivum cDNA, mRNA sequence [CK162127]	gb|EMT05249,1| Caffeoyl-CoA O-methyltransferase [Aegilops tauschii]
A_99_P272966		0.0108248	0.000410749	-2.16049	-1.11136	2.16049	Tamyb7	FGAS021512 Triticum aestivum FGAS: Library 5 GATE 7 Triticum aestivum cDNA, mRNA sequence [CK209733]	gb|EEC74141,1| hypothetical protein OsI_09212 [Oryza sativa Indica Group]
A_99_P342431		0.0309593	0.00989599	-2.15739	-1.10929	2.15739		Rep: Chromosome chr18 scaffold_1, whole genome shotgun sequence - Vitis vinifera (Grape), partial (22%) [TC426105]	gb|EMT03626,1| hypothetical protein F775_30132 [Aegilops tauschii]
A_99_P532277		0.0483067	0.0213331	-2.15679	-1.10889	2.15679			emb|CAD33257,1| alternative oxidase [Crocus sativus]
A_99_P260111		0.0154903	0.00208953	-2.15266	-1.10612	2.15266		Rep: Uroporphyrin-III C-methyltransferase - Brucella ovis (strain ATCC 25840 / 63/290 / NCTC 10512), partial (10%) [TC422328]	ref|XP_006280247,1| hypothetical protein CARUB_v10026161mg [Capsella rubella] gb|EOA13145,1| hypothetical protein CARUB_v10026161mg [Capsella rubella]
A_99_P094130		0.0341306	0.0120774	-2.14267	-1.09941	2.14267	a1	Triticum aestivum mRNA for glycosyltransferase (a1 gene) [AJ867392]	ref|XP_002518201,1| conserved hypothetical protein [Ricinus communis] gb|EEF44334,1| conserved hypothetical protein [Ricinus communis]
A_99_P313986		0.0473732	0.0207737	-2.13494	-1.0942	2.13494			gb|ADN34175,1| hypothetical protein [Cucumis melo subsp, melo]
A_99_P431702		0.0171876	0.00280614	-2.13271	-1.09269	2.13271		Triticum aestivum cDNA, clone: WT003_I14, cultivar: Chinese Spring [AK332255]	dbj|BAM10432,1| betaine aldehyde dehydrogenase [Leymus chinensis]
A_99_P128310		0.0166121	0.0025483	-2.12495	-1.08743	2.12495	Myb2	FGAS084153 Triticum aestivum FGAS: Library 6 CAP GATE 1 Triticum aestivum cDNA, mRNA sequence [DR738936]	gb|EMT12739,1| Myb-related protein Myb4 [Aegilops tauschii]
A_99_P536577		0.0370892	0.01416	-2.1202	-1.0842	2.1202			gb|EMT24173,1| Lipoxygenase 2,1, chloroplastic [Aegilops tauschii]
A_99_P479147		0.0108248	0.000414886	-2.10885	-1.07645	2.10885		Rep: Transcription factor Myb2 - Triticum aestivum (Wheat), partial (69%) [TC421665]	gb|ABA94124,1| transposon protein, putative, Mutator sub-class [Oryza sativa Japonica Group]
A_99_P203771		0.0305874	0.00958515	-2.1085	-1.07621	2.1085		Rep: Ornithine--oxo-acid aminotransferase - Saccharum officinarum (Sugarcane), partial (44%) [TC376717]	gb|EMS55823,1| putative ornithine aminotransferase [Triticum urartu]
A_99_P258561		0.0483067	0.0214212	-2.10455	-1.07351	2.10455		Rep: CBL-interacting protein kinase 24 - Populus trichocarpa (Western balsam poplar) (Populus balsamiferasubsp, trichocarpa), partial (55%) [TC374004]	gb|EMT04671,1| hypothetical protein F775_20290 [Aegilops tauschii]
A_99_P551552		0.0346291	0.0126347	-2.10062	-1.07081	2.10062		Rep: White-brown complex homolog protein 23 - Arabidopsis thaliana (Mouse-ear cress), partial (11%) [TC452976]	gb|EMT07325,1| ABC transporter G family member 22 [Aegilops tauschii]
A_99_P447357		0.0185303	0.00329284	-2.09914	-1.0698	2.09914		Triticum aestivum cDNA, clone: WT005_J13, cultivar: Chinese Spring [AK333079]	gb|EMT12910,1| Putative inactive receptor kinase [Aegilops tauschii]
A_99_P574312		0.0306581	0.00964456	-2.09804	-1.06905	2.09804		Triticum aestivum cDNA, clone: WT010_C14, cultivar: Chinese Spring [AK334515]	N/A
A_99_P226236		0.0222379	0.00485936	-2.09546	-1.06727	2.09546			gb|EMT25743,1| Aspartate aminotransferase, cytoplasmic [Aegilops tauschii]
A_99_P363021		0.0135537	0.00115664	-2.08877	-1.06265	2.08877		Triticum aestivum cDNA, clone: SET6_I14, cultivar: Chinese Spring [AK331168]	gb|EEC75227,1| hypothetical protein OsI_11496 [Oryza sativa Indica Group]
A_99_P421412		0.0176325	0.00293643	-2.08246	-1.05829	2.08246			gb|EMT08212,1| hypothetical protein F775_27020 [Aegilops tauschii]
A_99_P232346		0.0232187	0.00546662	-2.07613	-1.0539	2.07613		Rep: NAC transcription factor - Hordeum vulgare var, distichum (Two-rowed barley), partial (35%) [TC391577]	gb|ABD32378,2| hypothetical protein MtrDRAFT_AC150244g35v2 [Medicago truncatula]
A_99_P308671		0.0164655	0.00241679	-2.07198	-1.05101	2.07198			gb|EMT32162,1| hypothetical protein F775_52190 [Aegilops tauschii]
A_99_P353481		0.027073	0.00741172	-2.06389	-1.04537	2.06389		Rep: Chromosome chr1 scaffold_5, whole genome shotgun sequence - Vitis vinifera (Grape), partial (6%) [TC428133]	gb|EMT24155,1| Putative alpha-galactosidase [Aegilops tauschii]
A_99_P510857		0.0181654	0.00313758	-2.06269	-1.04453	2.06269			gb|EYU32688,1| hypothetical protein MIMGU_mgv1a000018mg [Mimulus guttatus]
A_99_P219611		0.0248395	0.00617843	-2.06113	-1.04344	2.06113		Rep: Fatty acid desaturase - Zea mays (Maize), partial (16%) [TC410613]	ref|XP_006354978,1| PREDICTED: sacsin-like [Solanum tuberosum]
A_99_P211106		0.0189109	0.0034117	-2.05991	-1.04258	2.05991			ref|XP_005849966,1| hypothetical protein CHLNCDRAFT_17375, partial [Chlorella variabilis] gb|EFN57864,1| hypothetical protein CHLNCDRAFT_17375, partial [Chlorella variabilis]
A_99_P196726		0.0220578	0.00466379	-2.05982	-1.04252	2.05982		Rep: Aspartic proteinase - Triticum aestivum (Wheat), partial (60%) [TC394105]	ref|XP_007204781,1| hypothetical protein PRUPE_ppa015817mg, partial [Prunus persica] gb|EMJ05980,1| hypothetical protein PRUPE_ppa015817mg, partial [Prunus persica]
A_99_P557142		0.0305874	0.00958651	-2.05428	-1.03863	2.05428		Triticum aestivum cDNA, clone: WT003_I14, cultivar: Chinese Spring [AK332255]	dbj|BAJ96335,1| predicted protein [Hordeum vulgare subsp, vulgare]
A_99_P277716		0.0268452	0.00733598	-2.04191	-1.02992	2.04191		TSA: Triticum aestivum cultivar Bobwhite isotig05310,flagleaf mRNA sequence [HP614479]	gb|EMT08093,1| Putative mitochondrial chaperone BCS1-B [Aegilops tauschii]
A_99_P305876		0.0431989	0.0178902	-2.03904	-1.02789	2.03904		Rep: Os09g0454600 protein - Oryza sativa subsp, japonica (Rice), partial (29%) [TC405786]	gb|EMS54274,1| hypothetical protein TRIUR3_16873 [Triticum urartu]
A_99_P212641		0.0267128	0.00722003	-2.03808	-1.02721	2.03808		Rep: Sugar transporter protein - Ananas comosus (Pineapple), partial (26%) [TC381257]	gb|EMT28339,1| Sugar transporter ERD6-like protein 6 [Aegilops tauschii]
A_99_P256861		0.0483067	0.0214445	-2.0328	-1.02347	2.0328			gb|EMS54706,1| Lysosomal Pro-X carboxypeptidase [Triticum urartu]
A_99_P538012		0.029455	0.00888488	-2.02268	-1.01627	2.02268			ref|XP_006485875,1| PREDICTED: MLO-like protein 12-like [Citrus sinensis]
A_99_P176379		0.0267396	0.00726119	-2.02087	-1.01497	2.02087		TSA: Triticum aestivum cultivar Bobwhite isotig05310,flagleaf mRNA sequence [HP614479]	gb|EMS53863,1| putative mitochondrial chaperone BCS1-B [Triticum urartu]
A_99_P443942		0.0225474	0.00502073	-2.01678	-1.01206	2.01678		Rep: EREB - Saccharum arundinaceum, partial (34%) [TC399337]	N/A
A_99_P012624		0.022347	0.00491656	-2.01579	-1.01134	2.01579		FGAS018583 Triticum aestivum FGAS: Library 5 GATE 7 Triticum aestivum cDNA, mRNA sequence [CK206970]	gb|EMT11637,1| Putative DNA-binding protein ESCAROLA [Aegilops tauschii]
A_99_P291246		0.0181777	0.00314948	-2.01374	-1.00988	2.01374		Triticum aestivum cDNA, clone: SET5_A20, cultivar: Chinese Spring [AK330684]	gb|EMS52887,1| Lactation elevated protein 1 [Triticum urartu]
A_99_P303306		0.0250058	0.00631057	-1.99265	-0.994686	1.99265		Rep: Chromosome undetermined scaffold_484, whole genome shotgun sequence - Vitis vinifera (Grape), partial (94%) [TC396551]	N/A
A_99_P211461		0.0415371	0.0169126	-1.99245	-0.994543	1.99245		Rep: Chromosome chr1 scaffold_166, whole genome shotgun sequence - Vitis vinifera (Grape), partial (58%) [TC388900]	dbj|BAK03413,1| predicted protein [Hordeum vulgare subsp, vulgare] dbj|BAJ93218,1| predicted protein [Hordeum vulgare subsp, vulgare]
A_99_P221386		0.0304532	0.00947399	-1.98409	-0.988476	1.98409		Rep: Aldehyde oxidase-2 - Zea mays (Maize), partial (18%) [TC385025]	ref|XP_007207414,1| hypothetical protein PRUPE_ppa014644mg [Prunus persica] gb|EMJ08613,1| hypothetical protein PRUPE_ppa014644mg [Prunus persica]
A_99_P388397		0.00653832	5.53267e-05	-1.97268	-0.980155	1.97268		Rep: Os04g0679800 protein - Oryza sativa subsp, japonica (Rice), partial (77%) [TC389102]	gb|ABD83295,1| Fgenesh protein 81 [Beta vulgaris]
A_99_P303311		0.0210738	0.00422734	-1.96822	-0.976891	1.96822		Rep: Chromosome undetermined scaffold_484, whole genome shotgun sequence - Vitis vinifera (Grape), partial (94%) [TC396551]	gb|EMS50048,1| hypothetical protein TRIUR3_19360 [Triticum urartu]
A_99_P072760		0.0344633	0.0124588	-1.9638	-0.973649	1.9638		AZO2,108O11F001113 AZO2 Triticum aestivum cDNA clone AZO2108O11, mRNA sequence [CD868449]	ref|NP_001132513,1| uncharacterized protein LOC100193973 [Zea mays] gb|ACF81381,1| unknown [Zea mays]
A_99_P127030		0.0406414	0.0163086	-1.93439	-0.951877	1.93439		FGAS001093 Triticum aestivum FGAS: Library 2 Gate 3 Triticum aestivum cDNA, mRNA sequence [DR741161]	gb|EMT18411,1| hypothetical protein F775_32222 [Aegilops tauschii]
A_99_P464952		0.0217166	0.00451844	-1.9336	-0.951287	1.9336		Rep: Phytosulfokine-alpha 1 precursor - Triticum aestivum (Wheat), partial (42%) [TC413606]	ref|NP_195871,1| uncharacterized protein [Arabidopsis thaliana] emb|CAB85988,1| putative protein [Arabidopsis thaliana] gb|AED90483,1| uncharacterized protein AT5G02510 [Arabidopsis thaliana]
A_99_P290231		0.0151091	0.00154925	-1.92432	-0.944351	1.92432			ref|XP_003563989,1| PREDICTED: uncharacterized protein LOC100841206 [Brachypodium distachyon]
A_99_P343741		0.0105142	0.00038205	-1.91549	-0.937713	1.91549			gb|EMT01093,1| hypothetical protein F775_16963 [Aegilops tauschii]
A_99_P161272		0.0281853	0.00802489	-1.91279	-0.935681	1.91279	Glc1	Triticum aestivum beta 1,3-glucanase (Glc1) mRNA, complete cds [U30323]	gb|EMT31321,1| Glucan endo-1,3-beta-glucosidase [Aegilops tauschii]
A_99_P566337		0.0370201	0.0140732	-1.90803	-0.932085	1.90803		TSA: Triticum aestivum contig17591,TraeRec mRNA sequence [JP222311]	gb|AFW56312,1| hypothetical protein ZEAMMB73_371904, partial [Zea mays]
A_99_P547882		0.0246201	0.00600565	-1.89511	-0.92228	1.89511			N/A
A_99_P439542		0.019315	0.00352843	-1.89252	-0.920309	1.89252		Rep: NAC transcription factor - Hordeum vulgare var, distichum (Two-rowed barley), partial (37%) [TC396012]	ref|XP_004230862,1| PREDICTED: phospholipase A-2-activating protein-like [Solanum lycopersicum]
A_99_P011519		0.021269	0.00433003	-1.89214	-0.920019	1.89214		Rep: CBL-interacting protein kinase 24 - Populus trichocarpa (Western balsam poplar) (Populus balsamiferasubsp, trichocarpa), partial (81%) [TC373922]	tpg|DAA59544,1| TPA_ putative CBL-interacting protein kinase family protein [Zea mays]
A_99_P205411		0.0283008	0.00815638	-1.88684	-0.915973	1.88684		Rep: Expressed protein - Oryza sativa subsp, japonica (Rice), partial (93%) [TC450845]	emb|CBI20009,3| unnamed protein product [Vitis vinifera]
A_99_P227366		0.0154903	0.00177835	-1.88093	-0.911443	1.88093		Rep: Chitinase III-like protein - Oryza sativa subsp, japonica (Rice), partial (95%) [TC371648]	gb|EMT30400,1| hypothetical protein F775_27208 [Aegilops tauschii]
A_99_P454767		0.0164557	0.00239359	-1.87973	-0.910526	1.87973			gb|EXC06808,1| Putative mediator of RNA polymerase II transcription subunit 12 [Morus notabilis]
A_99_P431127		0.0341306	0.012095	-1.87954	-0.910381	1.87954			ref|XP_003078257,1| Calnexin (ISS) [Ostreococcus tauri] emb|CAL52997,1| Calnexin (ISS) [Ostreococcus tauri]
A_99_P232341		0.0176081	0.00291861	-1.86818	-0.901632	1.86818		Rep: NAC transcription factor - Hordeum vulgare var, distichum (Two-rowed barley), partial (37%) [TC396012]	gb|EMT15962,1| Ent-kaurene synthase-like protein 3 [Aegilops tauschii]
A_99_P444907		0.0154903	0.00207812	-1.86709	-0.900795	1.86709		Rep: Nuclear ribonuclease Z - Arabidopsis thaliana (Mouse-ear cress), partial (46%) [TC400080]	gb|EMS61729,1| hypothetical protein TRIUR3_20565 [Triticum urartu]
A_99_P290226		0.0164655	0.00242598	-1.86207	-0.896906	1.86207		Triticum aestivum cDNA, clone: WT004_F21, cultivar: Chinese Spring [AK332590]	gb|EMS60761,1| hypothetical protein TRIUR3_18834 [Triticum urartu]
A_99_P515342		0.0302265	0.00932761	-1.85591	-0.892125	1.85591			ref|XP_007135251,1| hypothetical protein PHAVU_010G113500g [Phaseolus vulgaris] gb|ESW07245,1| hypothetical protein PHAVU_010G113500g [Phaseolus vulgaris]
A_99_P311296		0.0127836	0.00090293	-1.84656	-0.884837	1.84656		Rep: Os04g0679800 protein - Oryza sativa subsp, japonica (Rice), partial (98%) [TC458073]	ref|XP_004967579,1| PREDICTED: kinetochore protein NDC80 homolog isoform X1 [Setaria italica]
A_99_P441822		0.0229841	0.00531343	-1.84486	-0.883515	1.84486		Rep: AG-motif binding protein-1 - Nicotiana tabacum (Common tobacco), partial (9%) [TC384283]	ref|XP_002979481,1| hypothetical protein SELMODRAFT_419221 [Selaginella moellendorffii] gb|EFJ19370,1| hypothetical protein SELMODRAFT_419221 [Selaginella moellendorffii]
A_99_P265331		0.0248395	0.00611533	-1.84445	-0.88319	1.84445			emb|CBI24529,3| unnamed protein product [Vitis vinifera]
A_99_P544937		0.00880151	0.000194542	-1.83598	-0.876547	1.83598		Rep: Os03g0299600 protein - Oryza sativa subsp, japonica (Rice), partial (34%) [TC450354]	N/A
A_99_P432662		0.0117549	0.000561707	-1.8183	-0.862593	1.8183			gb|EMS51401,1| hypothetical protein TRIUR3_15594 [Triticum urartu]
A_99_P329976		0.0121447	0.000628694	-1.80574	-0.852591	1.80574			gb|EMS51401,1| hypothetical protein TRIUR3_15594 [Triticum urartu]
A_99_P292716		0.0127836	0.000836902	-1.80547	-0.852376	1.80547			gb|EMS52241,1| Peroxidase 12 [Triticum urartu]
A_99_P504692		0.033391	0.0116223	-1.78366	-0.834843	1.78366			gb|EMT33660,1| 2-succinylbenzoate--CoA ligase [Aegilops tauschii]
A_99_P308651		0.0227677	0.00520178	-1.78031	-0.832125	1.78031		Triticum aestivum cDNA, clone: WT009_I04, cultivar: Chinese Spring [AK334206]	ref|XP_003559135,1| PREDICTED: uncharacterized protein LOC100828030 [Brachypodium distachyon]
A_99_P467622		0.0125509	0.000733406	-1.75983	-0.815438	1.75983			gb|EMT13258,1| Protein TRANSPARENT TESTA 12 [Aegilops tauschii]
A_99_P202811		0.0221812	0.00481152	-1.75941	-0.815091	1.75941			gb|EMS60451,1| hypothetical protein TRIUR3_04515 [Triticum urartu]
A_99_P127825		0.0127836	0.000826585	-1.74339	-0.801898	1.74339			gb|EMS46422,1| putative L-ascorbate peroxidase 7, chloroplastic [Triticum urartu]
A_99_P514917		0.0154903	0.00183292	-1.72974	-0.790556	1.72974		Rep: Chromosome chr5 scaffold_64, whole genome shotgun sequence - Vitis vinifera (Grape), partial (30%) [TC438560]	gb|EMS52195,1| Cysteine-rich receptor-like protein kinase 42 [Triticum urartu]
A_99_P203486		0.0264608	0.00712557	-1.72593	-0.787372	1.72593		Rep: Aspartic proteinase - Triticum aestivum (Wheat), partial (60%) [TC394105]	N/A
A_99_P450947		0.0166121	0.00256511	-1.71813	-0.780835	1.71813			dbj|BAK01637,1| predicted protein [Hordeum vulgare subsp, vulgare]
A_99_P346496		0.0181777	0.00316684	-1.70277	-0.767887	1.70277		Rep: F-box family protein - Oryza brachyantha, partial (62%) [TC398962]	ref|XP_002882039,1| expressed protein [Arabidopsis lyrata subsp, lyrata] gb|EFH58298,1| expressed protein [Arabidopsis lyrata subsp, lyrata]
A_99_P614957		0.0309593	0.0100086	-1.68854	-0.755777	1.68854			ref|XP_006851631,1| hypothetical protein AMTR_s00040p00201950 [Amborella trichopoda] gb|ERN13161,1| hypothetical protein AMTR_s00040p00201950 [Amborella trichopoda]
A_99_P414532		0.0265026	0.00715002	-1.6857	-0.753351	1.6857		TSA: Triticum aestivum cultivar Bobwhite isotig06635,flagleaf mRNA sequence [HP615812]	gb|AFW76050,1| hypothetical protein ZEAMMB73_219043 [Zea mays]
A_99_P204406		0.0154903	0.00177704	-1.68515	-0.752879	1.68515		Rep: Expressed protein - Oryza sativa subsp, japonica (Rice), partial (73%) [TC395345]	gb|EMS59721,1| Expansin-A4 [Triticum urartu]
A_99_P286566		0.0125509	0.000722134	-1.66679	-0.737071	1.66679			emb|CAQ58078,1| lipoxygenase [Capsicum annuum]
A_99_P227051		0.0303216	0.00938778	-1.6558	-0.72753	1.6558		Rep: Chromosome undetermined scaffold_30, whole genome shotgun sequence - Vitis vinifera (Grape), partial (34%) [TC427297]	ref|XP_003061866,1| predicted protein [Micromonas pusilla CCMP1545] gb|EEH53578,1| predicted protein [Micromonas pusilla CCMP1545]
A_99_P264751		0.0292707	0.00869474	-1.63559	-0.709815	1.63559		TSA: Triticum aestivum cultivar Bobwhite isotig06640,flagleaf mRNA sequence [HP615817]	ref|XP_006838238,1| hypothetical protein AMTR_s00103p00027130 [Amborella trichopoda] gb|ERN00807,1| hypothetical protein AMTR_s00103p00027130 [Amborella trichopoda]
A_99_P505872		0.0162527	0.00226261	-1.62543	-0.700823	1.62543		Rep: Glutathione transferase - Triticum aestivum (Wheat), complete [TC434300]	emb|CAC94005,1| glutathione transferase [Triticum aestivum] gb|EMT19277,1| hypothetical protein F775_26875 [Aegilops tauschii]
A_99_P423827		0.0184804	0.00325638	-1.60208	-0.679944	1.60208		Rep: Phytepsin precursor (Aspartic proteinase) [Contains: Phytepsin 32 kDa subunit; Phytepsin 29 kDa subunit; Phytepsin 16 kDa subunit; Phytepsin 11 kDa subunit] - Hordeum vulgare (Barley), partial (31%) [TC383795]	ref|XP_002979510,1| hypothetical protein SELMODRAFT_111082 [Selaginella moellendorffii] gb|EFJ19399,1| hypothetical protein SELMODRAFT_111082 [Selaginella moellendorffii]
A_99_P154392		0.0140372	0.00127865	-1.59111	-0.670032	1.59111		CJ951738 Y, Ogihara unpublished cDNA library, whchul Triticum aestivum cDNA clone whchul33j05 5', mRNA sequence [CJ951738]	N/A
A_99_P204656		0.0113247	0.000501556	-1.59061	-0.669577	1.59061			gb|EMS59721,1| Expansin-A4 [Triticum urartu]
A_99_P272321		0.00880151	0.000194783	-1.55606	-0.637895	1.55606		Triticum aestivum cDNA, clone: SET2_K08, cultivar: Chinese Spring [AK335769]	ref|XP_003626057,1| Peptide chain release factor [Medicago truncatula] gb|AES82275,1| Peptide chain release factor [Medicago truncatula]
A_99_P115985		0.00880151	0.000266897	-1.51986	-0.603943	1.51986			gb|ABD32806,1| Cyclin-like F-box; F-box protein interaction domain; Galactose oxidase, central, related [Medicago truncatula]
A_99_P063617		0.0125509	0.000755383	-1.41868	-0.50455	1.41868		Rep: Chromosome chr4 scaffold_6, whole genome shotgun sequence - Vitis vinifera (Grape), partial (86%) [TC401225]	ref|XP_006843868,1| hypothetical protein AMTR_s00007p00264970 [Amborella trichopoda] gb|ERN05543,1| hypothetical protein AMTR_s00007p00264970 [Amborella trichopoda]
A_99_P118455		0.0127836	0.000940127	-1.34116	-0.423479	1.34116		CJ688773 Y,Ogihara unpublished cDNA library Wh_RDr Triticum aestivum cDNA clone whrd15f16 5', mRNA sequence [CJ688773]	ref|XP_003083971,1| delta 12 fatty acid desaturase (ISS) [Ostreococcus tauri] emb|CAL57938,1| delta 12 fatty acid desaturase (ISS) [Ostreococcus tauri]
A_99_P339161		0.00961342	0.000339748	-1.32164	-0.402325	1.32164		Rep: Possible OmpA family member precursor - Rhodopseudomonas palustris, partial (6%) [TC413825]	gb|EMS48624,1| hypothetical protein TRIUR3_24759 [Triticum urartu]
A_99_P297901		0.0180276	0.0030689	1.53799	0.621046	1.53799			ref|XP_003593809,1| Heat stress transcription factor A-4a [Medicago truncatula] gb|AES64060,1| Heat stress transcription factor A-4a [Medicago truncatula]
A_99_P487887		0.0226825	0.00513329	1.61166	0.688549	1.61166			gb|EMT14985,1| putative Amidophosphoribosyltransferase, chloroplastic [Aegilops tauschii]
A_99_P508347		0.0273833	0.0076325	1.65758	0.729081	1.65758		Rep: Apospory-associated protein C-like - Oryza sativa subsp, japonica (Rice), partial (90%) [TC370423]	gb|EYU17740,1| hypothetical protein MIMGU_mgv1a018663mg [Mimulus guttatus]
A_99_P345056		0.0159307	0.00218313	1.71639	0.779375	1.71639			ref|XP_006285058,1| hypothetical protein CARUB_v10006367mg [Capsella rubella] gb|EOA17956,1| hypothetical protein CARUB_v10006367mg [Capsella rubella]
A_99_P343986		0.0135537	0.00114223	1.74438	0.80271	1.74438		TSA: Triticum aestivum cultivar Bobwhite isotig17954,flagleaf mRNA sequence [HP627175]	dbj|BAF02546,1| triticain alpha [Triticum aestivum] gb|AFK80346,1| cysteine endopeptidase EP alpha [Secale cereale x Triticum turgidum subsp, durum]
A_99_P300106		0.0277959	0.00777636	1.77829	0.830494	1.77829		Rep: Cysteine synthase - Vitis vinifera (Grape), partial (46%) [TC390759]	dbj|BAJ90237,1| predicted protein [Hordeum vulgare subsp, vulgare]
A_99_P265636		0.026114	0.00682316	1.79932	0.84745	1.79932			ref|XP_005843922,1| hypothetical protein CHLNCDRAFT_9625, partial [Chlorella variabilis] gb|EFN51820,1| hypothetical protein CHLNCDRAFT_9625, partial [Chlorella variabilis]
A_99_P113375		0.0202093	0.00389956	1.80788	0.854298	1.80788	WAKL2	Triticum aestivum wall-associated kinase-like 2 (WAKL2) mRNA, complete cds, alternatively spliced [DQ177499]	gb|EMT29273,1| Wall-associated receptor kinase 3 [Aegilops tauschii]
A_99_P449167		0.0140372	0.00127107	1.83431	0.875241	1.83431		Rep: Chloroplast reductoisomerase - Oryza sativa subsp, indica (Rice), partial (56%) [TC403107]	gb|EMT12226,1| Ketol-acid reductoisomerase, chloroplastic [Aegilops tauschii]
A_99_P377992		0.0263772	0.00708995	1.85783	0.893622	1.85783		Rep: Chromosome chr19 scaffold_4, whole genome shotgun sequence - Vitis vinifera (Grape), partial (29%) [TC442656]	gb|EMT00860,1| Ribosomal protein L11 methyltransferase [Aegilops tauschii]
A_99_P234606		0.0312817	0.0102767	1.88724	0.916277	1.88724		TSA: Triticum aestivum cultivar Bobwhite isotig19348,flagleaf mRNA sequence [HP628570]	ref|XP_002993408,1| hypothetical protein SELMODRAFT_187457 [Selaginella moellendorffii] gb|EFJ05501,1| hypothetical protein SELMODRAFT_187457 [Selaginella moellendorffii]
A_99_P200016		0.00880151	0.000210223	1.90394	0.928991	1.90394			dbj|BAK01533,1| predicted protein [Hordeum vulgare subsp, vulgare]
A_99_P277776		0.0124036	0.000663948	1.90435	0.929297	1.90435			gb|ACL54619,1| unknown [Zea mays] gb|AFW79127,1| galactosylgalactosylxylosylprotein 3-beta-glucuronosyltransferase 1 [Zea mays]
A_99_P294896		0.0154903	0.00180421	1.92304	0.943389	1.92304		Rep: LigA - Methylobacterium sp, 4-46, partial (4%) [TC401170]	ref|XP_002443579,1| hypothetical protein SORBIDRAFT_08g021870 [Sorghum bicolor] gb|EES17417,1| hypothetical protein SORBIDRAFT_08g021870 [Sorghum bicolor]
A_99_P194553		0.0230694	0.00540851	1.92547	0.945209	1.92547		TSA: Triticum aestivum cultivar Bobwhite isotig17954,flagleaf mRNA sequence [HP627175]	ref|XP_003577762,1| PREDICTED: F-box/WD-40 repeat-containing protein At3g52030-like [Brachypodium distachyon]
A_99_P425137		0.0309867	0.0100872	1.92612	0.945699	1.92612			ref|XP_002525601,1| conserved hypothetical protein [Ricinus communis] gb|EEF36719,1| conserved hypothetical protein [Ricinus communis]
A_99_P420907		0.0403475	0.0159261	1.93243	0.950416	1.93243		Rep: Thiazole biosynthetic enzyme 1-2, chloroplast precursor - Zea mays (Maize), partial (69%) [TC381403]	gb|EMT30436,1| Thiazole biosynthetic enzyme 1-2, chloroplastic [Aegilops tauschii]
A_99_P453197		0.0311772	0.0102021	1.9363	0.953302	1.9363			ref|XP_006478019,1| PREDICTED: BTB/POZ domain-containing protein At1g04390-like isoform X1 [Citrus sinensis]
A_99_P418672		0.0331309	0.0114614	1.98383	0.988287	1.98383		Rep: Histidine kinase - Zea mays (Maize), partial (10%) [TC379586]	ref|XP_002298871,2| hypothetical protein POPTR_0001s37690g [Populus trichocarpa] gb|EEE83676,2| hypothetical protein POPTR_0001s37690g [Populus trichocarpa]
A_99_P531562		0.0127836	0.000935845	1.98743	0.990905	1.98743		Rep: HAP3-like transcriptional-activator - Oryza sativa subsp, indica (Rice), partial (25%) [TC445153]	ref|XP_004235228,1| PREDICTED: transcription elongation factor A protein 3-like isoform 2 [Solanum lycopersicum]
A_99_P518672		0.0397859	0.0155856	2.00252	1.00182	2.00252		Rep: Protein EGG APPARATUS-1 - Zea mays (Maize), partial (46%) [TC439978]	dbj|BAJ86484,1| predicted protein [Hordeum vulgare subsp, vulgare] dbj|BAJ87205,1| predicted protein [Hordeum vulgare subsp, vulgare]
A_99_P258411		0.0117343	0.000549044	2.00517	1.00373	2.00517		Rep: Cold induced protein-like - Oryza sativa subsp, japonica (Rice), partial (63%) [TC378326]	gb|EMS48744,1| hypothetical protein TRIUR3_08076 [Triticum urartu]
A_99_P230806		0.0406414	0.0163159	2.00625	1.0045	2.00625			gb|EMT04676,1| hypothetical protein F775_43999 [Aegilops tauschii]
A_99_P331906		0.0140372	0.00127598	2.01499	1.01078	2.01499		Rep: Chromosome chr2 scaffold_11, whole genome shotgun sequence - Vitis vinifera (Grape), partial (18%) [TC415498]	N/A
A_99_P232431		0.00523595	2.34562e-05	2.02093	1.01502	2.02093		Rep: Aluminum-induced protein-like protein - Setaria italica (Foxtail millet), partial (75%) [TC424547]	gb|EMT03178,1| hypothetical protein F775_26866 [Aegilops tauschii]
A_99_P272926		0.0164557	0.00239407	2.02237	1.01605	2.02237		Rep: Histidine kinase - Zea mays (Maize), partial (10%) [TC379586]	ref|XP_006584179,1| PREDICTED: uncharacterized protein At1g01500-like [Glycine max]
A_99_P204126		0.0341306	0.0120961	2.02242	1.01608	2.02242			emb|CAQ58078,1| lipoxygenase [Capsicum annuum]
A_99_P144970		0.0373939	0.0143147	2.03301	1.02362	2.03301			gb|EEE67600,1| hypothetical protein OsJ_25151 [Oryza sativa Japonica Group]
A_99_P489987		0.0289361	0.00852672	2.04002	1.02859	2.04002		Rep: LigA - Methylobacterium sp, 4-46, partial (6%) [TC427177]	ref|XP_006848288,1| hypothetical protein AMTR_s00013p00097650 [Amborella trichopoda] gb|ERN09869,1| hypothetical protein AMTR_s00013p00097650 [Amborella trichopoda]
A_99_P303986		0.0263231	0.0070623	2.04264	1.03043	2.04264		Rep: Chromosome chr18 scaffold_59, whole genome shotgun sequence - Vitis vinifera (Grape), partial (50%) [TC426159]	ref|XP_001695100,1| predicted protein [Chlamydomonas reinhardtii] gb|EDP01808,1| predicted protein [Chlamydomonas reinhardtii]
A_99_P055749		0.00880151	0.000118215	2.0461	1.03288	2.0461		FGAS056231 Triticum aestivum FGAS: Library 2 Gate 3 Triticum aestivum cDNA, mRNA sequence [CV761843]	emb|CAI93180,1| glycosyltransferase [Triticum aestivum]
A_99_P085805		0.0131783	0.00104298	2.04814	1.03432	2.04814		Rep: Chromosome chr14 scaffold_21, whole genome shotgun sequence - Vitis vinifera (Grape), partial (14%) [TC381361]	N/A
A_99_P356691		0.0202299	0.0039171	2.05043	1.03592	2.05043			gb|AAT73643,1| hypothetical protein [Oryza sativa Japonica Group] gb|AAU90158,1| hypothetical protein [Oryza sativa Japonica Group]
A_99_P410037		0.0491982	0.0222114	2.05525	1.03931	2.05525	cys1	TSA: Triticum aestivum cultivar Bobwhite isotig01370,flagleaf mRNA sequence [HP610486]	gb|AGI97003,1| O-acetylserine (thiol)-lyase [Triticum turgidum subsp, durum]
A_99_P529772		0.0127836	0.000861751	2.06135	1.04359	2.06135			gb|AAM46868,1|AF490377_1 mutant isoamylase [Hordeum vulgare]
A_99_P155612		0.032278	0.0109254	2.06188	1.04396	2.06188		Rep: Hox1w - Petromyzon marinus (Sea lamprey), partial (7%) [TC380605]	N/A
A_99_P335756		0.0283195	0.00817585	2.07096	1.0503	2.07096			ref|XP_007156819,1| hypothetical protein PHAVU_002G020300g [Phaseolus vulgaris] gb|ESW28813,1| hypothetical protein PHAVU_002G020300g [Phaseolus vulgaris]
A_99_P462477		0.0393642	0.0154008	2.07653	1.05417	2.07653			ref|XP_002971378,1| hypothetical protein SELMODRAFT_412051 [Selaginella moellendorffii] gb|EFJ27127,1| hypothetical protein SELMODRAFT_412051 [Selaginella moellendorffii]
A_99_P315741		0.031838	0.0106021	2.08353	1.05903	2.08353		Rep: Os02g0629400 protein - Oryza sativa subsp, japonica (Rice), partial (56%) [TC389914]	ref|XP_006851486,1| hypothetical protein AMTR_s00040p00143220 [Amborella trichopoda] gb|ERN13067,1| hypothetical protein AMTR_s00040p00143220 [Amborella trichopoda]
A_99_P063372		0.0283766	0.00820758	2.08648	1.06107	2.08648		Triticum aestivum cDNA, clone: WT009_A04, cultivar: Chinese Spring [AK334154]	gb|EMT02423,1| hypothetical protein F775_16942 [Aegilops tauschii]
A_99_P440457		0.0248395	0.00619152	2.09307	1.06562	2.09307		Rep: Hox1w - Petromyzon marinus (Sea lamprey), partial (7%) [TC380605]	N/A
A_99_P208346		0.0188846	0.00339341	2.09755	1.0687	2.09755		TSA: Triticum aestivum cultivar Bobwhite isotig21701,flagleaf mRNA sequence [HP630914]	ref|XP_003605555,1| hypothetical protein MTR_4g033730 [Medicago truncatula] gb|AES87752,1| hypothetical protein MTR_4g033730 [Medicago truncatula]
A_99_P534647		0.0454754	0.0192499	2.10029	1.07059	2.10029	PCS1	Triticum aestivum phytochelatin synthase (PCS1) mRNA, complete cds [AF093752]	emb|CAN60970,1| hypothetical protein VITISV_026408 [Vitis vinifera]
A_99_P448302		0.0226825	0.00512769	2.11202	1.07863	2.11202			gb|EMT27272,1| Signal transduction histidine-protein kinase barA [Aegilops tauschii]
A_99_P557882		0.0281761	0.00800824	2.11811	1.08278	2.11811		Rep: Monosaccharide transporter 6 - Oryza sativa subsp, japonica (Rice), partial (8%) [TC455223]	emb|CAA59422,1| orf [Oryza sativa]
A_99_P058371		0.0279432	0.00788639	2.11882	1.08326	2.11882		Rep: Os05g0524100 protein - Oryza sativa subsp, japonica (Rice), partial (31%) [TC457925]	dbj|BAJ90839,1| predicted protein [Hordeum vulgare subsp, vulgare] dbj|BAJ96394,1| predicted protein [Hordeum vulgare subsp, vulgare]
A_99_P232411		0.0207971	0.00413043	2.12538	1.08772	2.12538			gb|EMT03178,1| hypothetical protein F775_26866 [Aegilops tauschii]
A_99_P163227		0.0454754	0.0192654	2.13276	1.09272	2.13276		Rep: Bifunctional aspartokinase/homoserine dehydrogenase 2, chloroplast precursor (AK-HD 2) (AK-HSDH 2) [Includes: Aspartokinase ; Homoserine dehydrogenase ] - Zea mays (Maize), partial (42%) [TC388532]	ref|XP_006643869,1| PREDICTED: protein ALWAYS EARLY 3-like [Oryza brachyantha]
A_99_P521847		0.00880151	0.000226508	2.14865	1.10343	2.14865		Triticum aestivum cDNA, clone: WT008_N16, cultivar: Chinese Spring [AK334034]	gb|EMT27039,1| putative Non-specific lipid-transfer protein [Aegilops tauschii]
A_99_P286076		0.0296238	0.00898005	2.15579	1.10821	2.15579		Rep: Anthranilate synthase alpha 1 - Camptotheca acuminata, partial (26%) [TC383140]	###############################################################################################################################################################################################################################################################
A_99_P531462		0.0127836	0.000964397	2.18527	1.12781	2.18527		Rep: Ribose-phosphate pyrophosphokinase 1 - Arabidopsis thaliana (Mouse-ear cress), partial (18%) [TC412770]	gb|AAM65575,1| unknown [Arabidopsis thaliana]
A_99_P334386		0.0147609	0.00138866	2.20658	1.14181	2.20658			gb|ABK24926,1| unknown [Picea sitchensis]
A_99_P022359		0.0225474	0.00501453	2.20851	1.14307	2.20851		Rep: RNA-binding protein-like - Oryza sativa subsp, japonica (Rice), partial (41%) [TC437692]	ref|XP_003630128,1| Spatacsin [Medicago truncatula] gb|AET04604,1| Spatacsin [Medicago truncatula]
A_99_P035024		0.0441118	0.018444	2.22041	1.15083	2.22041		TSA: Triticum aestivum contig02407,TraeRec mRNA sequence [JP208778]	gb|EMT25190,1| hypothetical protein F775_13111 [Aegilops tauschii]
A_99_P271941		0.0213423	0.00438744	2.22803	1.15577	2.22803		Rep: Proline transporter - Hordeum vulgare (Barley), partial (33%) [TC431046]	ref|XP_004145463,1| PREDICTED: uncharacterized protein LOC101203162 [Cucumis sativus]
A_99_P000406		0.0336319	0.0117352	2.23318	1.1591	2.23318	PCS1	Triticum aestivum phytochelatin synthase (PCS1) mRNA, complete cds [AF093752]	gb|EMT23611,1| Glutathione gamma-glutamylcysteinyltransferase 1 [Aegilops tauschii]
A_99_P413147		0.0267396	0.00724744	2.24513	1.1668	2.24513	cys1	TSA: Triticum aestivum cultivar Bobwhite isotig01370,flagleaf mRNA sequence [HP610486]	ref|XP_006339303,1| PREDICTED: high affinity nitrate transporter 2,4-like [Solanum tuberosum]
A_99_P315036		0.0421227	0.0172978	2.24818	1.16876	2.24818			gb|EMS52090,1| hypothetical protein TRIUR3_21512 [Triticum urartu]
A_99_P029609		0.0408454	0.0164683	2.25581	1.17365	2.25581		Rep: Cysteine synthase (O-acetylserine sulfhydrylase) (O- acetylserine (Thiol)-lyase) - Triticum aestivum (Wheat), complete [TC369358]	emb|CAI93180,1| glycosyltransferase [Triticum aestivum]
A_99_P199296		0.0309867	0.0100578	2.25663	1.17417	2.25663			N/A
A_99_P137460		0.0246519	0.00603719	2.28302	1.19094	2.28302		FGAS053598 Triticum aestivum FGAS: Library 2 Gate 3 Triticum aestivum cDNA, mRNA sequence [CV759216]	emb|CAI93180,1| glycosyltransferase [Triticum aestivum]
A_99_P418782		0.0203527	0.0039837	2.28502	1.1922	2.28502		Rep: Thiazole biosynthetic enzyme 1-2, chloroplast precursor - Zea mays (Maize), partial (51%) [TC379890]	ref|XP_001753425,1| predicted protein [Physcomitrella patens] gb|EDQ81648,1| predicted protein [Physcomitrella patens]
A_99_P162327		0.0234508	0.00553294	2.29986	1.20155	2.29986		FGAS015686 Triticum aestivum FGAS: Library 4 Gate 8 Triticum aestivum cDNA, mRNA sequence [CK163071]	ref|XP_004145463,1| PREDICTED: uncharacterized protein LOC101203162 [Cucumis sativus]
A_99_P433347		0.0493288	0.0223374	2.31674	1.2121	2.31674		Rep: Galactinol synthase - Triticum aestivum (Wheat), partial (44%) [TC391144]	dbj|BAF51565,1| galactinol synthase [Triticum aestivum]
A_99_P411142		0.0154903	0.001855	2.33156	1.2213	2.33156		Rep: NBS-LRR resistance-like protein - Hordeum vulgare (Barley), partial (13%) [TC373207]	ref|XP_007160477,1| hypothetical protein PHAVU_002G325300g [Phaseolus vulgaris] gb|ESW32471,1| hypothetical protein PHAVU_002G325300g [Phaseolus vulgaris]
A_99_P562472		0.0154903	0.00201168	2.33471	1.22324	2.33471			###############################################################################################################################################################################################################################################################
A_99_P525387		0.0342519	0.0122007	2.33977	1.22637	2.33977		Rep: ENOD40-like protein - Hordeum vulgare (Barley), complete [TC442947]	tpg|DAA37011,1| TPA_ hypothetical protein ZEAMMB73_737187 [Zea mays] tpg|DAA37012,1| TPA_ hypothetical protein ZEAMMB73_737187 [Zea mays]
A_99_P248846		0.0261569	0.00687447	2.34331	1.22855	2.34331		Triticum aestivum cDNA, clone: WT002_J12, cultivar: Chinese Spring [AK331877]	emb|CAI93180,1| glycosyltransferase [Triticum aestivum]
A_99_P468112		0.0166121	0.00256065	2.34606	1.23024	2.34606		Rep: Chromosome chr18 scaffold_1, whole genome shotgun sequence - Vitis vinifera (Grape), partial (62%) [TC403334]	ref|XP_002436855,1| hypothetical protein SORBIDRAFT_10g010010 [Sorghum bicolor] gb|EER88222,1| hypothetical protein SORBIDRAFT_10g010010 [Sorghum bicolor]
A_99_P080395		0.0313308	0.010324	2.34746	1.2311	2.34746	LOC100125710	Triticum aestivum cDNA, clone: WT012_G08, cultivar: Chinese Spring [AK335233]	dbj|BAK01032,1| predicted protein [Hordeum vulgare subsp, vulgare]
A_99_P500527		0.0262901	0.0070011	2.35027	1.23283	2.35027		Triticum aestivum cDNA, clone: WT008_B07, cultivar: Chinese Spring [AK333853]	ref|XP_001785789,1| predicted protein [Physcomitrella patens] gb|EDQ49396,1| predicted protein [Physcomitrella patens]
A_99_P473132		0.0411354	0.0166396	2.35644	1.23661	2.35644		Rep: Glycosyltransferase - Triticum aestivum (Wheat), partial (8%) [TC418388]	ref|XP_002506434,1| predicted protein [Micromonas sp, RCC299] gb|ACO67692,1| predicted protein [Micromonas sp, RCC299]
A_99_P285541		0.0487901	0.02193	2.35805	1.2376	2.35805		Rep: GATA zinc finger family protein, expressed - Oryza sativa subsp, japonica (Rice), partial (50%) [TC423400]	ref|XP_004963571,1| PREDICTED: uncharacterized protein LOC101784163 [Setaria italica]
A_99_P345151		0.0359335	0.0133431	2.36031	1.23897	2.36031		Rep: Expressed protein - Oryza sativa subsp, japonica (Rice), partial (25%) [TC417753]	gb|EMT10243,1| hypothetical protein F775_10103 [Aegilops tauschii]
A_99_P226881		0.0364888	0.0137128	2.36323	1.24076	2.36323			gb|EMT20808,1| Protein RUPTURED POLLEN GRAIN 1 [Aegilops tauschii]
A_99_P433467		0.0150442	0.00146023	2.36806	1.24371	2.36806			###############################################################################################################################################################################################################################################################
A_99_P502907		0.0229841	0.0053656	2.3778	1.24963	2.3778		Rep: Proteasome subunit alpha type - Oryza sativa subsp, japonica (Rice), partial (37%) [TC432973]	###############################################################################################################################################################################################################################################################
A_99_P098660		0.0490851	0.0221115	2.37917	1.25046	2.37917		WHE4334_H03_O06ZS Wheat meiotic anther cDNA library Triticum aestivum cDNA clone WHE4334_H03_O06, mRNA sequence [CA486700]	tpg|DAA47610,1| TPA_ hypothetical protein ZEAMMB73_019937 [Zea mays]
A_99_P453002		0.0150951	0.00147531	2.38294	1.25274	2.38294		Rep: Os06g0326400 protein - Oryza sativa subsp, japonica (Rice), partial (30%) [TC405788]	gb|EPS60399,1| hypothetical protein M569_14404, partial [Genlisea aurea]
A_99_P537227		0.00910672	0.000295056	2.38737	1.25542	2.38737		Rep: Cyclin-P1-1 - Oryza sativa subsp, japonica (Rice), partial (26%) [TC447392]	gb|EMT30181,1| hypothetical protein F775_06184 [Aegilops tauschii]
A_99_P518542		0.0162527	0.00227631	2.39477	1.25989	2.39477		Rep: Aquaporin NIP1-3 - Oryza sativa subsp, japonica (Rice), partial (88%) [TC439932]	ref|XP_006355956,1| PREDICTED: probable peptide transporter At1g52190-like [Solanum tuberosum]
A_99_P465672		0.0124036	0.000691488	2.39541	1.26027	2.39541			gb|EMS59060,1| 2-aminoethanethiol dioxygenase [Triticum urartu]
A_99_P420627		0.0154903	0.00177076	2.41332	1.27102	2.41332		Rep: Chromosome chr18 scaffold_1, whole genome shotgun sequence - Vitis vinifera (Grape), partial (59%) [TC381185]	ref|XP_006293149,1| hypothetical protein CARUB_v10019461mg [Capsella rubella] gb|EOA26047,1| hypothetical protein CARUB_v10019461mg [Capsella rubella]
A_99_P308101		0.0278671	0.00784905	2.41395	1.27139	2.41395		Rep: Os06g0326400 protein - Oryza sativa subsp, japonica (Rice), partial (30%) [TC405788]	gb|EMT11806,1| Pyrophosphate--fructose 6-phosphate 1-phosphotransferase subunit alpha [Aegilops tauschii]
A_99_P542967		0.0235894	0.00560088	2.42265	1.27659	2.42265		Triticum aestivum cDNA, clone: WT002_J12, cultivar: Chinese Spring [AK331877]	gb|EMS59051,1| E3 ubiquitin-protein ligase MARCH8 [Triticum urartu]
A_99_P226846		0.0282732	0.00809214	2.42502	1.27799	2.42502			gb|EXB98556,1| MLO-like protein 6 [Morus notabilis]
A_99_P377937		0.0250058	0.00625449	2.4252	1.2781	2.4252		Rep: Chromosome chr6 scaffold_3, whole genome shotgun sequence - Vitis vinifera (Grape), partial (83%) [TC437178]	dbj|BAJ91679,1| predicted protein [Hordeum vulgare subsp, vulgare]
A_99_P500372		0.0417671	0.0170478	2.43526	1.28408	2.43526		Triticum aestivum cDNA, clone: WT013_N08, cultivar: Chinese Spring [AK335811]	gb|EMT28193,1| DNA polymerase delta small subunit [Aegilops tauschii]
A_99_P226931		0.0483067	0.0214329	2.44162	1.28784	2.44162			gb|EMT03611,1| Protein RUPTURED POLLEN GRAIN 1 [Aegilops tauschii]
A_99_P535067		0.0135537	0.00113419	2.44441	1.28949	2.44441		Rep: Amino acid permease - Plantago major (Common plantain), partial (24%) [TC446561]	gb|EEE53056,1| hypothetical protein OsJ_35791 [Oryza sativa Japonica Group]
A_99_P199721		0.0463284	0.0199242	2.45124	1.29351	2.45124		Rep: Wpk4 protein kinase - Triticum aestivum (Wheat), partial (32%) [TC438644]	dbj|BAA34675,1| wpk4 protein kinase [Triticum aestivum]
A_99_P381502		0.0111988	0.000479392	2.45626	1.29646	2.45626		Rep: Uncharacterized plant-specific domain TIGR01615 family protein, expressed - Oryza sativa subsp, japonica (Rice), partial (13%) [TC446415]	N/A
A_99_P209556		0.0151091	0.00154705	2.45994	1.29862	2.45994			ref|XP_002436855,1| hypothetical protein SORBIDRAFT_10g010010 [Sorghum bicolor] gb|EER88222,1| hypothetical protein SORBIDRAFT_10g010010 [Sorghum bicolor]
A_99_P246026		0.0292707	0.00868883	2.46764	1.30313	2.46764			gb|AAB18208,1| cold acclimation protein WCOR615 [Triticum aestivum] gb|EMS61758,1| hypothetical protein TRIUR3_22815 [Triticum urartu]
A_99_P198211		0.00880151	0.000149384	2.48445	1.31293	2.48445			N/A
A_99_P213796		0.0256024	0.00663955	2.49711	1.32026	2.49711			dbj|BAF79926,1| group3 late embryogenesis abundant protein [Triticum aestivum]
A_99_P248866		0.0154903	0.00189014	2.49925	1.3215	2.49925		TSA: Triticum aestivum cultivar Bobwhite contig00108,flagleaf mRNA sequence [HP609207]	gb|EMS59051,1| E3 ubiquitin-protein ligase MARCH8 [Triticum urartu]
A_99_P272936		0.0219264	0.00461666	2.53477	1.34186	2.53477			gb|EMT27272,1| Signal transduction histidine-protein kinase barA [Aegilops tauschii]
A_99_P126975		0.0455805	0.019353	2.55943	1.35582	2.55943		CJ716685 Y,Ogihara unpublished cDNA library Wh_VWD Triticum aestivum cDNA clone whvd13d23 5', mRNA sequence [CJ716685]	gb|EMT10243,1| hypothetical protein F775_10103 [Aegilops tauschii]
A_99_P450387		0.0154903	0.00203627	2.57001	1.36177	2.57001		TSA: Triticum aestivum cultivar Bobwhite isotig20498,flagleaf mRNA sequence [HP629725]	ref|NP_001147408,1| phytosulfokine peptide precursor3 [Zea mays] gb|ACG27399,1| phytosulfokine precursor protein containing protein [Zea mays]
A_99_P481047		0.0485632	0.0217703	2.57165	1.3627	2.57165		Rep: Phosphomethylpyrimidine kinase - Aurantimonas sp, SI85-9A1, partial (5%) [TC404860]	N/A
A_99_P209991		0.0134496	0.00108454	2.57278	1.36333	2.57278			ref|XP_006293149,1| hypothetical protein CARUB_v10019461mg [Capsella rubella] gb|EOA26047,1| hypothetical protein CARUB_v10019461mg [Capsella rubella]
A_99_P185849		0.021735	0.00454373	2.58027	1.36752	2.58027		TSA: Triticum aestivum cultivar Bobwhite contig00108,flagleaf mRNA sequence [HP609207]	gb|EMS59051,1| E3 ubiquitin-protein ligase MARCH8 [Triticum urartu]
A_99_P268456		0.0166121	0.00252917	2.59048	1.37322	2.59048		Triticum aestivum cDNA, clone: WT008_B07, cultivar: Chinese Spring [AK333853]	ref|XP_002452937,1| hypothetical protein SORBIDRAFT_04g035270 [Sorghum bicolor] gb|EES05913,1| hypothetical protein SORBIDRAFT_04g035270 [Sorghum bicolor]
A_99_P301951		0.0107156	0.000400036	2.59389	1.37512	2.59389			emb|CAI93180,1| glycosyltransferase [Triticum aestivum]
A_99_P566432		0.0127836	0.000930043	2.61857	1.38878	2.61857		TSA: Triticum aestivum cultivar Bobwhite contig00108,flagleaf mRNA sequence [HP609207]	gb|EMT01402,1| Pre-mRNA-splicing factor SYF1 [Aegilops tauschii]
A_99_P171319		0.00866946	8.19909e-05	2.63811	1.3995	2.63811		BJ277888 Y, Ogihara unpublished cDNA library, Wh_r Triticum aestivum cDNA clone whr13i18 5', mRNA sequence [BJ277888]	gb|EMT15603,1| Anthocyanidin 5,3-O-glucosyltransferase [Aegilops tauschii]
A_99_P014044		0.0351483	0.0128591	2.66455	1.41389	2.66455		Rep: Chromosome chr4 scaffold_32, whole genome shotgun sequence - Vitis vinifera (Grape), partial (55%) [TC382872]	gb|EMS66888,1| hypothetical protein TRIUR3_08428 [Triticum urartu]
A_99_P313106		0.0465239	0.0200546	2.70045	1.4332	2.70045		Rep: Chromosome chr18 scaffold_1, whole genome shotgun sequence - Vitis vinifera (Grape), partial (12%) [TC406821]	gb|EYU37352,1| hypothetical protein MIMGU_mgv1a025104mg, partial [Mimulus guttatus]
A_99_P072520		0.0292707	0.00869809	2.72425	1.44586	2.72425		AZO2,073A14F000912 AZO2 Triticum aestivum cDNA clone AZO2073A14, mRNA sequence [CD864981]	gb|EMT28254,1| hypothetical protein F775_06906 [Aegilops tauschii]
A_99_P508212		0.0181654	0.00313232	2.80997	1.49055	2.80997			gb|EMT33359,1| Cysteine synthase, chloroplastic/chromoplastic [Aegilops tauschii]
A_99_P158637		0.0309593	0.00981134	2.81271	1.49196	2.81271			gb|EMS59092,1| Sucrose synthase 1 [Triticum urartu]
A_99_P131315		0.0120927	0.000608925	2.82905	1.50032	2.82905	WCO1	Triticum aestivum WCO1 mRNA for B-box transcription factor, complete cds [AB361064]	dbj|BAG12868,1| B-box transcription factor [Triticum aestivum]
A_99_P141558		0.0440683	0.0184038	2.82966	1.50063	2.82966			gb|EMS60706,1| Dynamin-2B [Triticum urartu]
A_99_P134095		0.0454754	0.0192717	2.89485	1.53349	2.89485		TSA: Triticum aestivum cultivar Bobwhite isotig14392,flagleaf mRNA sequence [HP623606]	ref|XP_006646562,1| PREDICTED: ribonuclease 2-like [Oryza brachyantha]
A_99_P485917		0.00880151	0.000185981	2.90846	1.54026	2.90846		Rep: Submergence induced protein SI397 - Zea mays (Maize), partial (47%) [TC425181]	dbj|BAJ85001,1| predicted protein [Hordeum vulgare subsp, vulgare]
A_99_P293486		0.0126712	0.000804631	2.91862	1.54529	2.91862		Rep: Chromosome chr7 scaffold_20, whole genome shotgun sequence - Vitis vinifera (Grape), partial (92%) [TC435693]	ref|XP_004985291,1| PREDICTED: uncharacterized protein LOC101775138 isoform X1 [Setaria italica]
A_99_P144338		0.0483546	0.0215418	2.91864	1.5453	2.91864		CJ851704 Y, Ogihara unpublished cDNA library, whsctal Triticum aestivum cDNA clone whsctal1g19 5', mRNA sequence [CJ851704]	gb|EMT18099,1| Wall-associated receptor kinase 4 [Aegilops tauschii]
A_99_P082200		0.0403589	0.0159589	2.93562	1.55366	2.93562		FGAS062490 Triticum aestivum FGAS: Library 2 Gate 3 Triticum aestivum cDNA, mRNA sequence [CV768099]	gb|AEV91165,1| MYB-related protein [Aegilops speltoides] gb|EMT01033,1| DnaJ homolog subfamily C member 2 [Aegilops tauschii]
A_99_P155317		0.0273833	0.00762482	2.97398	1.57239	2.97398		Rep: 6-phosphogluconate dehydrogenase, decarboxylating - Oryza sativa subsp, japonica (Rice), partial (55%) [TC379244]	gb|EMS56831,1| 6-phosphogluconate dehydrogenase, decarboxylating [Triticum urartu]
A_99_P053422		0.0154903	0.001989	2.99069	1.58048	2.99069		wre1n,pk0127,f1 wre1n Triticum aestivum cDNA clone wre1n,pk0127,f1 5' end, mRNA sequence [CA648062]	dbj|BAJ98203,1| predicted protein [Hordeum vulgare subsp, vulgare] dbj|BAK02528,1| predicted protein [Hordeum vulgare subsp, vulgare] dbj|BAJ95865,1| predicted protein [Hordeum vulgare subsp, vulgare]
A_99_P344306		0.0309593	0.0100321	3.003	1.5864	3.003		Rep: D site-binding protein - Bos taurus (Bovine), partial (5%) [TC400744]	ref|XP_007028549,1| Uncharacterized protein TCM_024390 [Theobroma cacao] gb|EOY09051,1| Uncharacterized protein TCM_024390 [Theobroma cacao]
A_99_P248851		0.0282027	0.00804389	3.01043	1.58997	3.01043			gb|EMT07547,1| Hydroxyisourate hydrolase [Aegilops tauschii]
A_99_P208396		0.0202093	0.00390304	3.02082	1.59494	3.02082			ref|XP_002986512,1| glycosyltransferase-like protein [Selaginella moellendorffii] gb|EFJ12369,1| glycosyltransferase-like protein [Selaginella moellendorffii]
A_99_P254001		0.0167446	0.0026588	3.02791	1.59832	3.02791		Rep: O-methyltransferase family protein, expressed - Oryza sativa subsp, japonica (Rice), partial (96%) [TC395887]	ref|XP_002513617,1| conserved hypothetical protein [Ricinus communis] gb|EEF49020,1| conserved hypothetical protein [Ricinus communis]
A_99_P107635		0.0137036	0.0012265	3.05541	1.61137	3.05541		KUCD01_04_F02_T3 WSWR cDNA library Triticum aestivum cDNA, mRNA sequence [DN828913]	gb|EMS50456,1| Auxin-induced protein 5NG4 [Triticum urartu]
A_99_P100425		0.00880151	0.000266163	3.06907	1.6178	3.06907		FGAS055802 Triticum aestivum FGAS: Library 2 Gate 3 Triticum aestivum cDNA, mRNA sequence [CV761414]	gb|EMS46597,1| putative mannose-6-phosphate isomerase [Triticum urartu]
A_99_P561407		0.0151091	0.00159671	3.07888	1.62241	3.07888		Rep: Plasma membrane ATPase - Triticum aestivum (Wheat), partial (5%) [TC456575]	dbj|BAJ89265,1| predicted protein [Hordeum vulgare subsp, vulgare]
A_99_P248841		0.0232187	0.00545692	3.09406	1.6295	3.09406			gb|EMT07547,1| Hydroxyisourate hydrolase [Aegilops tauschii]
A_99_P539482		0.0111988	0.000440909	3.10168	1.63305	3.10168			ref|XP_003544728,2| PREDICTED: uncharacterized protein LOC100795386 [Glycine max]
A_99_P431412		0.0124036	0.000689962	3.10936	1.63662	3.10936		Rep: Response regulator 5 - Zea mays (Maize), partial (11%) [TC389645]	gb|AFW70139,1| hypothetical protein ZEAMMB73_003058 [Zea mays]
A_99_P286756		0.00952029	0.000330173	3.14697	1.65396	3.14697		Rep: Mitogen-activated protein kinase 8 - Oryza sativa subsp, japonica (Rice), partial (26%) [TC398882]	ref|XP_006374750,1| hypothetical protein POPTR_0014s004701g, partial [Populus trichocarpa] gb|ERP52547,1| hypothetical protein POPTR_0014s004701g, partial [Populus trichocarpa]
A_99_P281226		0.0263231	0.00702511	3.18354	1.67063	3.18354		Rep: Chromosome chr11 scaffold_118, whole genome shotgun sequence - Vitis vinifera (Grape), partial (57%) [TC402894]	ref|XP_002448904,1| hypothetical protein SORBIDRAFT_05g001190 [Sorghum bicolor] gb|EES07892,1| hypothetical protein SORBIDRAFT_05g001190 [Sorghum bicolor]
A_99_P462052		0.00880151	0.00022271	3.26596	1.70751	3.26596		Rep: Seed specific protein, 5'-partial-like protein - Oryza sativa subsp, japonica (Rice), partial (11%) [TC411837]	gb|EMS63953,1| hypothetical protein TRIUR3_28321 [Triticum urartu]
A_99_P259911		0.0126712	0.000806183	3.27199	1.71017	3.27199		Triticum aestivum cDNA, clone: WT011_P12, cultivar: Chinese Spring [AK335062]	ref|XP_003631008,1| THO complex subunit [Medicago truncatula] gb|AET05484,1| THO complex subunit [Medicago truncatula]
A_99_P497082		0.018007	0.00305644	3.28551	1.71612	3.28551		Rep: 6-phosphogluconate dehydrogenase, decarboxylating - Oryza sativa subsp, indica (Rice), partial (25%) [TC444857]	###############################################################################################################################################################################################################################################################
A_99_P254006		0.0331309	0.0114544	3.33549	1.7379	3.33549		Rep: O-methyltransferase family protein - Oryza sativa subsp, japonica (Rice), partial (90%) [TC428269]	ref|XP_004302104,1| PREDICTED: uncharacterized protein LOC101296301 [Fragaria vesca subsp, vesca]
A_99_P503727		0.0162527	0.00227807	3.3483	1.74343	3.3483			ref|XP_001759849,1| predicted protein [Physcomitrella patens] gb|EDQ75353,1| predicted protein [Physcomitrella patens]
A_99_P259901		0.0151091	0.00160076	3.37466	1.75474	3.37466		Rep: F12M16,12 - Arabidopsis thaliana (Mouse-ear cress), partial (40%) [TC372455]	gb|EMT26919,1| hypothetical protein F775_25869 [Aegilops tauschii]
A_99_P052251		0.00903718	0.000279033	3.3885	1.76065	3.3885			ref|XP_002264727,1| PREDICTED: UDP-glucose flavonoid 3-O-glucosyltransferase 6 [Vitis vinifera] emb|CBI24155,3| unnamed protein product [Vitis vinifera]
A_99_P259896		0.0155934	0.0021112	3.39133	1.76185	3.39133		Rep: F12M16,12 - Arabidopsis thaliana (Mouse-ear cress), partial (40%) [TC372455]	gb|EMT26919,1| hypothetical protein F775_25869 [Aegilops tauschii]
A_99_P464542		0.0127836	0.000885951	3.3995	1.76532	3.3995			dbj|BAJ95182,1| predicted protein [Hordeum vulgare subsp, vulgare] dbj|BAJ97475,1| predicted protein [Hordeum vulgare subsp, vulgare]
A_99_P287896		0.0166121	0.00256309	3.41083	1.77012	3.41083			ref|XP_004971987,1| PREDICTED: uncharacterized protein LOC101762484 [Setaria italica]
A_99_P419062		0.040624	0.0162446	3.47797	1.79825	3.47797			ref|XP_006413013,1| hypothetical protein EUTSA_v10026934mg, partial [Eutrema salsugineum] gb|ESQ54466,1| hypothetical protein EUTSA_v10026934mg, partial [Eutrema salsugineum]
A_99_P146742		0.0316448	0.0105085	3.52771	1.81873	3.52771		Rep: Chromosome chr3 scaffold_8, whole genome shotgun sequence - Vitis vinifera (Grape), partial (15%) [TC414994]	dbj|BAJ93070,1| predicted protein [Hordeum vulgare subsp, vulgare]
A_99_P321711		0.00880151	0.000123869	3.55425	1.82954	3.55425		Rep: Cold induced protein-like - Oryza sativa subsp, japonica (Rice), partial (76%) [TC378785]	gb|EXB53573,1| hypothetical protein L484_009313 [Morus notabilis]
A_99_P281681		0.0367721	0.0139108	3.5657	1.83419	3.5657			ref|XP_004170450,1| PREDICTED: LOW QUALITY PROTEIN: ATPase family AAA domain-containing protein At1g05910-like [Cucumis sativus]
A_99_P435062		0.0156767	0.00213028	3.56654	1.83453	3.56654		Rep: Auxin response factor 17 - Oryza sativa subsp, indica (Rice), partial (12%) [TC392558]	gb|EMT11111,1| Auxin response factor 17 [Aegilops tauschii]
A_99_P401357		0.0181639	0.00311263	3.57463	1.8378	3.57463			gb|AAC62127,1| hypothetical protein [Arabidopsis thaliana]
A_99_P290116		0.0166258	0.00263166	3.60488	1.84995	3.60488	TPS	Triticum aestivum cDNA, clone: WT007_G01, cultivar: Chinese Spring [AK331389]	ref|XP_006349135,1| PREDICTED: probable fatty acyl-CoA reductase 5-like [Solanum tuberosum]
A_99_P313734		0.0246201	0.00601715	3.6209	1.85635	3.6209		Rep: Predicted protein - Physcomitrella patens subsp, patens, partial (8%) [TC426673]	gb|EMT28219,1| hypothetical protein F775_25180 [Aegilops tauschii]
A_99_P000256		0.0384863	0.0149041	3.63169	1.86064	3.63169	glp2b	FGAS000391 Triticum aestivum FGAS: Library 2 Gate 3 Triticum aestivum cDNA, mRNA sequence [DR740444]	gb|EMT10611,1| Germin-like protein 8-11 [Aegilops tauschii]
A_99_P254016		0.0166121	0.00255951	3.63551	1.86216	3.63551		Rep: O-methyltransferase - Oryza sativa subsp, japonica (Rice), partial (24%) [TC397822]	ref|XP_006853110,1| hypothetical protein AMTR_s00038p00132760 [Amborella trichopoda] gb|ERN14577,1| hypothetical protein AMTR_s00038p00132760 [Amborella trichopoda]
A_99_P281671		0.0437334	0.0182204	3.63694	1.86272	3.63694		Rep: Boron transporter 1 - Arabidopsis thaliana (Mouse-ear cress), partial (91%) [TC381799]	gb|EMT30931,1| Putative boron transporter 2 [Aegilops tauschii]
A_99_P417597		0.00880151	0.000182182	3.66341	1.87319	3.66341		Rep: Os05g0524100 protein - Oryza sativa subsp, japonica (Rice), partial (25%) [TC378630]	ref|XP_006468374,1| PREDICTED: protein CHUP1, chloroplastic-like [Citrus sinensis]
A_99_P214486		0.00880151	0.000104897	3.71726	1.89424	3.71726		Rep: Auxin response factor 17 - Oryza sativa subsp, japonica (Rice), partial (34%) [TC427997]	gb|EMS51666,1| Auxin response factor 17 [Triticum urartu]
A_99_P424367		0.0154903	0.00206546	3.75741	1.90974	3.75741			gb|EMS67284,1| Spastin [Triticum urartu]
A_99_P460217		0.0151091	0.00155456	3.83891	1.9407	3.83891			gb|EMT26441,1| Spastin [Aegilops tauschii]
A_99_P250731		0.0154903	0.00185791	3.84623	1.94344	3.84623			gb|AAQ56222,1| antiviral/ribosome-inactivating protein [Amaranthus tricolor]
A_99_P483022		0.00952029	0.000331717	3.99822	1.99936	3.99822		Rep: FRO2 homolog - Arabidopsis thaliana (Mouse-ear cress), partial (18%) [TC423920]	gb|EMS45573,1| Superoxide-generating NADPH oxidase heavy chain subunit B [Triticum urartu]
A_99_P525412		0.00880151	0.000266384	4.04197	2.01506	4.04197			N/A
A_99_P291586		0.0154903	0.00179271	4.19729	2.06946	4.19729		Rep: Vegetative cell wall protein - Chlamydomonas incerta, partial (4%) [TC379202]	ref|XP_007141766,1| hypothetical protein PHAVU_008G224000g [Phaseolus vulgaris] gb|ESW13760,1| hypothetical protein PHAVU_008G224000g [Phaseolus vulgaris]
A_99_P252211		0.0483325	0.0215021	4.30283	2.10528	4.30283		FGAS084915 Triticum aestivum FGAS: Library 6 CAP GATE 1 Triticum aestivum cDNA, mRNA sequence [DR739698]	N/A
A_99_P345371		0.00880151	0.000256799	4.44343	2.15167	4.44343			ref|XP_006418647,1| hypothetical protein EUTSA_v10002914mg [Eutrema salsugineum] gb|ESQ37083,1| hypothetical protein EUTSA_v10002914mg [Eutrema salsugineum]
A_99_P107690		0.0151091	0.00154551	4.47065	2.16049	4.47065		CJ875123 Y, Ogihara unpublished cDNA library, whthls Triticum aestivum cDNA clone whthls18c07 5', mRNA sequence [CJ875123]	gb|EMT23891,1| Myb family transcription factor APL [Aegilops tauschii]
A_99_P545967		0.0111988	0.000443234	4.50373	2.17112	4.50373		Rep: Chromosome chr2 scaffold_105, whole genome shotgun sequence - Vitis vinifera (Grape), partial (4%) [TC450793]	N/A
A_99_P401992		0.0273833	0.00763298	4.57048	2.19235	4.57048			ref|XP_002309905,1| hypothetical protein POPTR_0007s04000g [Populus trichocarpa] gb|EEE90355,1| hypothetical protein POPTR_0007s04000g [Populus trichocarpa]
A_99_P484377		0.0154903	0.00202463	4.71862	2.23836	4.71862			ref|YP_358637,1| hypothetical protein PhapfoPp091 [Phalaenopsis aphrodite subsp, formosana] gb|AAW82573,1| hypothetical protein [Phalaenopsis aphrodite subsp, formosana]
A_99_P195753		0.0248395	0.00618873	4.76768	2.25329	4.76768	ST3,6	Triticum aestivum cDNA, clone: SET2_J23, cultivar: Chinese Spring [AK335668]	ref|XP_006858959,1| hypothetical protein AMTR_s00068p00110730 [Amborella trichopoda] gb|ERN20426,1| hypothetical protein AMTR_s00068p00110730 [Amborella trichopoda]
A_99_P331236		0.020185	0.00383482	4.96542	2.31192	4.96542		Rep: Os01g0820300 protein - Oryza sativa subsp, japonica (Rice), partial (3%) [TC429947]	ref|XP_006651526,1| PREDICTED: uncharacterized protein LOC102703670 [Oryza brachyantha]
A_99_P006041		0.0125509	0.000755963	5.08604	2.34654	5.08604			dbj|BAJ94605,1| predicted protein [Hordeum vulgare subsp, vulgare]
A_99_P554347		0.0111988	0.000477564	5.16196	2.36792	5.16196		Rep: Os03g0388900 protein - Oryza sativa subsp, japonica (Rice), partial (39%) [TC453943]	gb|EMS50676,1| Metacaspase-1 [Triticum urartu]
A_99_P098710		0.0225474	0.00497887	5.58253	2.48092	5.58253			gb|EMS60331,1| hypothetical protein TRIUR3_15438 [Triticum urartu]
A_99_P277326		0.0164557	0.00237978	5.66968	2.50327	5.66968			gb|EMS50922,1| Two-component response regulator ARR8 [Triticum urartu]
A_99_P277346		0.0135537	0.00114584	5.69454	2.50958	5.69454			gb|EMT09801,1| Two-component response regulator ARR8 [Aegilops tauschii]
A_99_P251706		0.0311922	0.0102318	5.70213	2.5115	5.70213		Rep: Germin-like protein 4 - Triticum monococcum (Einkorn wheat) (Small spelt), partial (87%) [TC375903]	gb|EMT00456,1| Germin-like protein 8-5 [Aegilops tauschii]
A_99_P522547		0.0220578	0.00466628	5.70541	2.51233	5.70541			gb|EMT04676,1| hypothetical protein F775_43999 [Aegilops tauschii]
A_99_P424997		0.00653832	4.43049e-05	5.86856	2.55301	5.86856		Rep: 10A19I,8 - Oryza sativa subsp, japonica (Rice), partial (30%) [TC384743]	ref|XP_003054819,1| prasinophyte-specific protein [Micromonas pusilla CCMP1545] gb|EEH60071,1| prasinophyte-specific protein [Micromonas pusilla CCMP1545]
A_99_P212266		0.00952029	0.000325917	6.04972	2.59687	6.04972		Rep: Os03g0388900 protein - Oryza sativa subsp, japonica (Rice), partial (18%) [TC428788]	gb|EMT12600,1| hypothetical protein F775_43750 [Aegilops tauschii]
A_99_P499957		0.0399452	0.0156996	6.12471	2.61464	6.12471			N/A
A_99_P212271		0.0126712	0.000807321	6.28908	2.65285	6.28908		Rep: Os03g0388900 protein - Oryza sativa subsp, japonica (Rice), partial (23%) [TC378098]	gb|EMS54793,1| Metacaspase-1 [Triticum urartu]
A_99_P166022		0.0127836	0.000885654	6.70379	2.74498	6.70379		TSA: Triticum aestivum cultivar Bobwhite isotig02229,flagleaf mRNA sequence [HP611372]	gb|EMT22524,1| Light-inducible protein CPRF2 [Aegilops tauschii]
A_99_P230736		0.0273414	0.00756685	6.73864	2.75246	6.73864			gb|EMT04676,1| hypothetical protein F775_43999 [Aegilops tauschii]
A_99_P310886		0.0248395	0.00618226	6.88931	2.78436	6.88931		TSA: Triticum aestivum cultivar Bobwhite isotig00246,flagleaf mRNA sequence [HP609283]	N/A
A_99_P084060		0.0151869	0.00168575	7.10853	2.82955	7.10853		FGAS067000 Triticum aestivum FGAS: Library 2 Gate 3 Triticum aestivum cDNA, mRNA sequence [CV772605]	gb|EMT29993,1| hypothetical protein F775_30159 [Aegilops tauschii]
A_99_P308196		0.0111988	0.000475787	7.34661	2.87708	7.34661			gb|EMS46246,1| hypothetical protein TRIUR3_28783 [Triticum urartu]
A_99_P136450		0.0227084	0.00516804	7.45493	2.89819	7.45493			gb|EMS63193,1| L-Ala-D/L-Glu epimerase [Triticum urartu]
A_99_P229376		0.0284013	0.00830275	7.69297	2.94354	7.69297		Rep: Pathogenesis-related 1a - Triticum monococcum (Einkorn wheat) (Small spelt), partial (80%) [TC384382]	emb|CAI93180,1| glycosyltransferase [Triticum aestivum]
A_99_P487912		0.0154412	0.00173704	8.07531	3.01352	8.07531		Rep: Glutaredoxin-C1 precursor - Oryza sativa subsp, japonica (Rice), partial (94%) [TC426163]	dbj|BAJ89491,1| predicted protein [Hordeum vulgare subsp, vulgare]
A_99_P408672		0.020185	0.00381913	8.47179	3.08267	8.47179		Rep: Adenine phosphoribosyltransferase - Triticum aestivum (Wheat), partial (98%) [TC370738]	ref|XP_004138108,1| PREDICTED: 1-deoxy-D-xylulose 5-phosphate reductoisomerase, chloroplastic-like [Cucumis sativus] ref|XP_004155015,1| PREDICTED: 1-deoxy-D-xylulose 5-phosphate reductoisomerase, chloroplastic-like [Cucumis sativus]
A_99_P182972		0.0127836	0.000974186	8.91369	3.15602	8.91369		FGAS069315 Triticum aestivum FGAS: Library 2 Gate 3 Triticum aestivum cDNA, mRNA sequence [CV774915]	emb|CAI93180,1| glycosyltransferase [Triticum aestivum]
A_99_P362421		0.00584431	3.19997e-05	9.47227	3.24371	9.47227		Rep: Chromosome 13 SCAF14566, whole genome shotgun sequence - Tetraodon nigroviridis (Green puffer), partial (6%) [TC436210]	dbj|BAJ94321,1| predicted protein [Hordeum vulgare subsp, vulgare]
A_99_P268781		0.0166121	0.00255799	11.4261	3.51426	11.4261		Triticum aestivum cDNA, clone: WT013_L04, cultivar: Chinese Spring [AK335754]	dbj|BAK06072,1| predicted protein [Hordeum vulgare subsp, vulgare]
A_99_P095910		0.0441708	0.0185346	12.4722	3.64064	12.4722		wlm96,pk029,o18 wlm96 Triticum aestivum cDNA clone wlm96,pk029,o18 5' end, mRNA sequence [CA685366]	gb|EMT23431,1| hypothetical protein F775_26545 [Aegilops tauschii]
A_99_P024619		0.0319024	0.010765	14.8286	3.89031	14.8286		AZO1,003M24F010109 AZO1 Triticum aestivum cDNA clone AZO1003M24, mRNA sequence [CD861795]	gb|EMS58244,1| hypothetical protein TRIUR3_29839 [Triticum urartu]
A_99_P179790		0.00523595	2.29369e-05	15.1421	3.92049	15.1421		wle1n,pk0062,b12 wle1n Triticum aestivum cDNA clone wle1n,pk0062,b12 5' end, mRNA sequence [CA632242]	gb|ACH69772,1| Adf2 [Hordeum vulgare subsp, vulgare] gb|ACH70383,1| actin depolymerization factor-like protein [Hordeum vulgare subsp, vulgare]
A_99_P050234		0.0282732	0.00808427	16.6969	4.06151	16.6969		Rep: Serine/threonine protein kinase precursor - Nocardioides sp, (strain BAA-499 / JS614), partial (6%) [TC434364]	gb|EMT05691,1| hypothetical protein F775_29758 [Aegilops tauschii]
A_99_P299366		0.0283913	0.00823898	17.8905	4.16112	17.8905		AZO1,003M24F010109 AZO1 Triticum aestivum cDNA clone AZO1003M24, mRNA sequence [CD861795]	gb|EMS58244,1| hypothetical protein TRIUR3_29839 [Triticum urartu]
A_99_P338386		0.0117312	0.000543058	18.4269	4.20374	18.4269			N/A
A_99_P299371		0.0318955	0.0106371	18.6725	4.22284	18.6725			gb|EMS58244,1| hypothetical protein TRIUR3_29839 [Triticum urartu]
A_99_P072530		0.0278647	0.00782266	20.0604	4.32628	20.0604		Rep: Glycine-rich protein GRP18 - Arabidopsis thaliana (Mouse-ear cress), partial (7%) [TC408658]	N/A
A_99_P120834		0.017094	0.00278235	30.1973	4.91635	30.1973		TSA: Triticum aestivum cultivar Bobwhite contig25883,flagleaf mRNA sequence [HP609225]	ref|XP_002528210,1| Auxin-induced protein 5NG4, putative [Ricinus communis] gb|EEF34167,1| Auxin-induced protein 5NG4, putative [Ricinus communis]
A_99_P455762		0.0151869	0.00164591	37.8072	5.24059	37.8072		Rep: Glutaredoxin-C1 precursor - Oryza sativa subsp, japonica (Rice), partial (94%) [TC407602]	gb|EMT22951,1| Glutaredoxin-C1 [Aegilops tauschii]
A_99_P549027		0.0240011	0.00573706	42.4879	5.40898	42.4879		Rep: Basic helix-loop-helix protein - Hordeum vulgare (Barley), partial (87%) [TC451913]	ref|XP_002322205,1| hypothetical protein POPTR_0015s09680g [Populus trichocarpa] gb|EEF06332,1| hypothetical protein POPTR_0015s09680g [Populus trichocarpa]
A_99_P446457		0.0137036	0.0012278	47.0991	5.55763	47.0991		Rep: Glutaredoxin-C1 precursor - Oryza sativa subsp, japonica (Rice), partial (97%) [TC401195]	gb|EMS60895,1| hypothetical protein TRIUR3_15807 [Triticum urartu]
A_99_P115130		0.00523595	1.4966e-05	52.4437	5.7127	52.4437		CJ659786 Y,Ogihara unpublished cDNA library Wh_HGCPCDAM Triticum aestivum cDNA clone whhg20e20 5', mRNA sequence [CJ659786]	gb|EMT04849,1| hypothetical protein F775_29691 [Aegilops tauschii]
A_99_P153527		0.0131955	0.00105091	86.8713	6.44081	86.8713		CJ907213 Y, Ogihara unpublished cDNA library, whthkles Triticum aestivum cDNA clone whthkles6f15 5', mRNA sequence [CJ907213]	gb|EMS62879,1| Glutaredoxin-C1 [Triticum urartu]
A_99_P434687		0.0125509	0.000743812	208.162	7.70156	208.162		Rep: Glutaredoxin-C1 precursor - Oryza sativa subsp, japonica (Rice), partial (97%) [TC392299]	gb|EMT22949,1| Glutaredoxin-C1 [Aegilops tauschii]

## Sheet: ctrl vs ss 2xfold anova benj co
ProbeName	Corrected p-value	p-value	Fold change([ctrl] vs [ss])	Log Fold change([ctrl] vs [ss])	Absolute Fold change([ctrl] vs [ss])	GeneSymbol	Description
A_99_P009801	0.02219	0.00482704	-136.439	-7.09211	136.439		EST162 Genes amplified from wheat FGAS cDNA libraries Triticum aestivum cDNA clone C65R1L1-81, mRNA sequence [DY761266]	dbj|BAJ92553,1| predicted protein [Hordeum vulgare subsp, vulgare]
A_99_P324301	0.0212512	0.00430882	-65.1917	-6.02662	65.1917			gb|EMT27806,1| Cytochrome P450 94A1 [Aegilops tauschii]
A_99_P352254	0.0341306	0.0120186	-47.8757	-5.58122	47.8757		Rep: ZIM motif family protein, expressed - Oryza sativa subsp, japonica (Rice), partial (39%) [TC458318]	gb|EMS64782,1| Protein TIFY 3A [Triticum urartu]
A_99_P109090	0.0304532	0.00945547	-40.5703	-5.34235	40.5703		FGAS062048 Triticum aestivum FGAS: Library 2 Gate 3 Triticum aestivum cDNA, mRNA sequence [CV767657]	emb|CAI93180,1| glycosyltransferase [Triticum aestivum]
A_99_P261221	0.0154903	0.00193254	-38.7373	-5.27565	38.7373		Rep: Os04g0301500 protein - Oryza sativa subsp, japonica (Rice), partial (24%) [TC403274]	N/A
A_99_P017704	0.00880151	0.000157196	-37.3147	-5.22167	37.3147			gb|EMS65852,1| hypothetical protein TRIUR3_13481 [Triticum urartu]
A_99_P443962	0.0154903	0.0019945	-30.6304	-4.93689	30.6304		Rep: Os04g0301500 protein - Oryza sativa subsp, japonica (Rice), partial (34%) [TC399372]	gb|EXB55187,1| hypothetical protein L484_018114 [Morus notabilis]
A_99_P415257	0.0117312	0.000533585	-25.753	-4.68667	25.753			gb|ACB88321,1| RNA polymerase C, partial (chloroplast) [Catananche caespitosa]
A_99_P476032	0.0201107	0.00375386	-25.1428	-4.65207	25.1428		Rep: O-antigen polymerase - Psychroflexus torquis ATCC 700755, partial (5%) [TC419972]	ref|XP_003589621,1| LRR receptor-like serine/threonine-protein kinase ERL2 [Medicago truncatula] gb|AES59872,1| LRR receptor-like serine/threonine-protein kinase ERL2 [Medicago truncatula]
A_99_P495547	0.0154903	0.00205591	-24.1257	-4.5925	24.1257		Rep: Chromosome chr2 scaffold_105, whole genome shotgun sequence - Vitis vinifera (Grape), partial (9%) [TC429715]	ref|XP_003612653,1| ATP-dependent DNA helicase PIF1 [Medicago truncatula] gb|AES95611,1| ATP-dependent DNA helicase PIF1 [Medicago truncatula]
A_99_P388982	0.0245503	0.00597567	-23.8518	-4.57603	23.8518		Rep: ZIM motif family protein, expressed - Oryza sativa subsp, japonica (Rice), partial (54%) [TC430489]	emb|CAI93180,1| glycosyltransferase [Triticum aestivum]
A_99_P189787	0.0127836	0.000917068	-19.2066	-4.26353	19.2066		Rep: Predicted protein - Chlamydomonas reinhardtii, partial (5%) [TC408721]	emb|CAI93180,1| glycosyltransferase [Triticum aestivum]
A_99_P032504	0.0303216	0.00937737	-18.3477	-4.19753	18.3477		G608,107P05F010906 G608 Triticum aestivum cDNA clone G608107P05, mRNA sequence [CD918095]	gb|EMT24258,1| hypothetical protein F775_28603 [Aegilops tauschii]
A_99_P314586	0.0126712	0.000780701	-17.2586	-4.10925	17.2586			ref|XP_006488999,1| PREDICTED: major allergen Pru ar 1-like [Citrus sinensis]
A_99_P338506	0.0472699	0.020635	-14.7892	-3.88647	14.7892			gb|EMT13785,1| hypothetical protein F775_27600 [Aegilops tauschii]
A_99_P036619	0.0293936	0.00883711	-13.5195	-3.75697	13.5195		WHE0060_B10_C20ZK Wheat endosperm cDNA library Triticum aestivum cDNA clone WHE0060_B10_C20, mRNA sequence [BQ167250]	gb|EMT12435,1| hypothetical protein F775_08514 [Aegilops tauschii]
A_99_P576337	0.0181639	0.00311923	-13.2964	-3.73297	13.2964		Rep: ZIM motif family protein, expressed - Oryza sativa subsp, japonica (Rice), partial (43%) [TC461889]	gb|AHL27912,1| chalcone synthase, partial [Triticum aestivum]
A_99_P473887	0.0229841	0.00532475	-12.9561	-3.69556	12.9561		CJ699779 Y,Ogihara unpublished cDNA library Wh_SHDr Triticum aestivum cDNA clone whsd18f20 5', mRNA sequence [CJ699779]	gb|EMT05087,1| Chaperone protein dnaJ 8, chloroplastic [Aegilops tauschii]
A_99_P081875	0.0405922	0.0162045	-12.6461	-3.66062	12.6461		FGAS000548 Triticum aestivum FGAS: Library 2 Gate 3 Triticum aestivum cDNA, mRNA sequence [DR740606]	gb|EMT29520,1| hypothetical protein F775_26622 [Aegilops tauschii]
A_99_P082600	0.0252088	0.00642839	-12.3631	-3.62797	12.3631		FGAS067960 Triticum aestivum FGAS: Library 2 Gate 3 Triticum aestivum cDNA, mRNA sequence [CV773563]	dbj|BAJ88332,1| predicted protein [Hordeum vulgare subsp, vulgare]
A_99_P316491	0.0341306	0.0120481	-11.9034	-3.5733	11.9034			gb|EMS60575,1| hypothetical protein TRIUR3_11994 [Triticum urartu]
A_99_P536052	0.0389649	0.0151864	-11.6212	-3.53869	11.6212			ref|NP_001169637,1| uncharacterized protein LOC100383518 [Zea mays] gb|ACN34361,1| unknown [Zea mays] gb|AFW68058,1| beta tubulin4 [Zea mays]
A_99_P445542	0.0164655	0.00242216	-11.4116	-3.51243	11.4116		Rep: Os01g0108600 protein - Oryza sativa subsp, japonica (Rice), partial (35%) [TC400572]	gb|EMS45882,1| hypothetical protein TRIUR3_14872 [Triticum urartu]
A_99_P141418	0.00880151	0.000180031	-11.3898	-3.50967	11.3898		CJ859149 Y, Ogihara unpublished cDNA library, whsctal Triticum aestivum cDNA clone whsctal7k13 5', mRNA sequence [CJ859149]	ref|XP_004492420,1| PREDICTED: pentatricopeptide repeat-containing protein At4g28010-like [Cicer arietinum]
A_99_P501127	0.0346291	0.0126227	-10.9026	-3.4466	10.9026		Rep: VMP4 protein - Volvox carteri f, nagariensis, partial (3%) [TC432206]	gb|EEC70896,1| hypothetical protein OsI_02438 [Oryza sativa Indica Group]
A_99_P517172	0.0151091	0.00158804	-10.3986	-3.37831	10.3986		Rep: Myb4 transcription factor - Hordeum vulgare (Barley), partial (20%) [TC439362]	dbj|BAK02388,1| predicted protein [Hordeum vulgare subsp, vulgare]
A_99_P071975	0.0159325	0.00219677	-10.0202	-3.32483	10.0202		Triticum aestivum cDNA, clone: SET3_C08, cultivar: Chinese Spring [AK336065]	gb|EMS68526,1| MATE efflux family protein 9 [Triticum urartu]
A_99_P496467	0.0273036	0.00753695	-9.93879	-3.31307	9.93879		Rep: Chromosome chr2 scaffold_11, whole genome shotgun sequence - Vitis vinifera (Grape), partial (27%) [TC430154]	ref|XP_004295757,1| PREDICTED: pentatricopeptide repeat-containing protein At1g12300, mitochondrial-like [Fragaria vesca subsp, vesca]
A_99_P175874	0.0365174	0.013744	-9.52025	-3.251	9.52025		Rep: WRKY transcription factor 28 - Oryza sativa subsp, japonica (Rice), partial (31%) [TC400023]	gb|EMT04396,1| Putative WRKY transcription factor 40 [Aegilops tauschii]
A_99_P450157	0.0305874	0.00955388	-9.05392	-3.17854	9.05392		Rep: DNA-binding protein - Avena fatua (Wild oats), partial (26%) [TC403828]	gb|EMT04396,1| Putative WRKY transcription factor 40 [Aegilops tauschii]
A_99_P085775	0.0123357	0.000650863	-9.02708	-3.17426	9.02708		Rep: Glutathione S-transferase GST 22 - Zea mays (Maize), partial (83%) [TC372250]	gb|EMT19517,1| hypothetical protein F775_19882 [Aegilops tauschii]
A_99_P380797	0.0285883	0.00840998	-8.90896	-3.15526	8.90896		Rep: VMP4 protein - Volvox carteri f, nagariensis, partial (3%) [TC432206]	ref|NP_001145342,1| uncharacterized protein LOC100278671 [Zea mays] gb|ACG46905,1| hypothetical protein [Zea mays]
A_99_P235486	0.0227084	0.00517694	-8.75436	-3.13	8.75436		Rep: Phenylalanine ammonia-lyase - Triticum aestivum (Wheat), partial (27%) [TC407651]	gb|EMT33318,1| Phenylalanine ammonia-lyase [Aegilops tauschii]
A_99_P153237	0.0342519	0.0122072	-8.54143	-3.09448	8.54143		FGAS015261 Triticum aestivum FGAS: Library 4 Gate 8 Triticum aestivum cDNA, mRNA sequence [CK162662]	gb|EMT18086,1| hypothetical protein F775_32176 [Aegilops tauschii]
A_99_P282721	0.0403918	0.0160736	-8.44299	-3.07775	8.44299		Rep: HS1-like protein - Saccharum hybrid cultivar, partial (42%) [TC396579]	gb|EMT27237,1| hypothetical protein F775_08679 [Aegilops tauschii]
A_99_P411432	0.0458989	0.0195796	-8.3811	-3.06714	8.3811			N/A
A_99_P194333	0.0293908	0.00879897	-7.99938	-2.99989	7.99938		Rep: HS1-like protein - Saccharum hybrid cultivar, partial (6%) [TC444375]	ref|XP_007031820,1| Uncharacterized protein isoform 2 [Theobroma cacao] gb|EOY02746,1| Uncharacterized protein isoform 2 [Theobroma cacao]
A_99_P353296	0.0154903	0.00201474	-7.98922	-2.99805	7.98922		Rep: Expressed protein - Oryza sativa subsp, japonica (Rice), partial (30%) [TC447394]	gb|EMS47684,1| hypothetical protein TRIUR3_26835 [Triticum urartu]
A_99_P334111	0.0495801	0.0225319	-7.7332	-2.95107	7.7332		Rep: Os03g0188500 protein - Oryza sativa subsp, japonica (Rice), partial (78%) [TC398097]	N/A
A_99_P302616	0.0125509	0.000762177	-7.69352	-2.94364	7.69352		Rep: AT5g59220/mnc17_110 - Arabidopsis thaliana (Mouse-ear cress), partial (28%) [TC398228]	gb|EMT07491,1| Putative protein phosphatase 2C 30 [Aegilops tauschii]
A_99_P469897	0.0255813	0.00662135	-7.62662	-2.93104	7.62662		Rep: Predicted protein - Coccidioides immitis, partial (8%) [TC416516]	gb|EMS46217,1| hypothetical protein TRIUR3_03610 [Triticum urartu]
A_99_P454652	0.0296086	0.00896069	-7.58896	-2.9239	7.58896		CJ884190 Y, Ogihara unpublished cDNA library, whthls Triticum aestivum cDNA clone whthls8e24 5', mRNA sequence [CJ884190]	gb|EMS47229,1| hypothetical protein TRIUR3_33285 [Triticum urartu]
A_99_P469812	0.0220704	0.00471697	-7.45125	-2.89748	7.45125		Rep: ZIM motif family protein, expressed - Oryza sativa subsp, japonica (Rice), partial (56%) [TC416451]	dbj|BAK05015,1| predicted protein [Hordeum vulgare subsp, vulgare]
A_99_P318361	0.0135537	0.00116714	-7.30442	-2.86877	7.30442		Rep: Chromosome chr18 scaffold_1, whole genome shotgun sequence - Vitis vinifera (Grape), partial (33%) [TC380834]	gb|EMS56187,1| hypothetical protein TRIUR3_02696 [Triticum urartu]
A_99_P187102	0.0252591	0.00647508	-7.25426	-2.85883	7.25426		Rep: Os02g0756800 protein - Oryza sativa subsp, japonica (Rice), partial (12%) [TC449174]	gb|EMT27501,1| hypothetical protein F775_13138 [Aegilops tauschii]
A_99_P322156	0.0240323	0.00580171	-7.21425	-2.85085	7.21425		Rep: Os01g0108600 protein - Oryza sativa subsp, japonica (Rice), partial (35%) [TC400572]	gb|EMS45882,1| hypothetical protein TRIUR3_14872 [Triticum urartu]
A_99_P410357	0.0279632	0.00790705	-7.10602	-2.82904	7.10602		Rep: Zinc finger protein-like - Oryza sativa subsp, japonica (Rice), partial (59%) [TC372432]	gb|EMS66508,1| hypothetical protein TRIUR3_25920 [Triticum urartu]
A_99_P334956	0.0292707	0.00869816	-6.96153	-2.7994	6.96153		Rep: Roothairless 3 - Zea mays (Maize), partial (41%) [TC377803]	ref|XP_002986282,1| hypothetical protein SELMODRAFT_123904 [Selaginella moellendorffii] gb|EFJ12491,1| hypothetical protein SELMODRAFT_123904 [Selaginella moellendorffii]
A_99_P287126	0.0337094	0.011779	-6.65799	-2.73509	6.65799		Rep: Os04g0684900 protein - Oryza sativa subsp, japonica (Rice), partial (40%) [TC393322]	ref|XP_005650695,1| TPR-like protein [Coccomyxa subellipsoidea C-169] gb|EIE26151,1| TPR-like protein [Coccomyxa subellipsoidea C-169]
A_99_P261206	0.0151091	0.00157191	-6.61564	-2.72588	6.61564		Rep: WRKY transcription factor - Hordeum vulgare (Barley), partial (14%) [TC438102]	dbj|BAK08337,1| predicted protein [Hordeum vulgare subsp, vulgare]
A_99_P497877	0.0261569	0.00687127	-6.5136	-2.70346	6.5136		Rep: Os04g0684900 protein - Oryza sativa subsp, japonica (Rice), partial (12%) [TC430778]	dbj|BAJ97724,1| predicted protein [Hordeum vulgare subsp, vulgare]
A_99_P222901	0.0471052	0.0204782	-6.39552	-2.67706	6.39552		Triticum aestivum cDNA, clone: SET1_G18, cultivar: Chinese Spring [AK330769]	ref|XP_007021741,1| Receptor like protein 53, putative [Theobroma cacao] gb|EOY13266,1| Receptor like protein 53, putative [Theobroma cacao]
A_99_P366181	0.0403874	0.0160424	-6.26649	-2.64766	6.26649		Rep: Cytokinin oxidase 3 - Zea mays (Maize), partial (38%) [TC453790]	ref|XP_003524938,1| PREDICTED: methyltransferase-like protein 13-like isoform 2 [Glycine max]
A_99_P390417	0.0339842	0.0119427	-6.18101	-2.62784	6.18101		Rep: Biotin/lipoyl attachment domain-containing protein - Roseiflexus castenholzii DSM 13941, partial (13%) [TC409722]	emb|CAI93180,1| glycosyltransferase [Triticum aestivum]
A_99_P117730	0.0154903	0.00200755	-6.04201	-2.59503	6.04201		CJ722857 Y,Ogihara unpublished cDNA library Wh_VHS Triticum aestivum cDNA clone whvh18h05 5', mRNA sequence [CJ722857]	gb|EMS49698,1| hypothetical protein TRIUR3_24810 [Triticum urartu]
A_99_P350361	0.0302265	0.00931969	-5.96757	-2.57714	5.96757		Rep: Predicted protein - Neurospora crassa, partial (5%) [TC400312]	N/A
A_99_P315376	0.0198232	0.00365086	-5.83979	-2.54592	5.83979		Rep: Chromosome chr2 scaffold_11, whole genome shotgun sequence - Vitis vinifera (Grape), partial (58%) [TC458805]	dbj|BAJ93880,1| predicted protein [Hordeum vulgare subsp, vulgare]
A_99_P555597	0.0189109	0.00341695	-5.68767	-2.50784	5.68767			ref|XP_006448444,1| hypothetical protein CICLE_v10017573mg [Citrus clementina] gb|ESR61684,1| hypothetical protein CICLE_v10017573mg [Citrus clementina]
A_99_P255001	0.0154903	0.00202234	-5.59405	-2.48389	5.59405		Rep: Hin1-like protein - Solanum tuberosum (Potato), partial (26%) [TC415786]	gb|AAK26123,1|AC084406_6 putative ubiquitin-conjugating protein [Oryza sativa Japonica Group] gb|AAT85266,1| ubiquitin-conjugating enzyme family protein [Oryza sativa Japonica Group]
A_99_P211591	0.040624	0.0162577	-5.5746	-2.47887	5.5746		Rep: EF-hand Ca2+binding protein CCD1 - Triticum aestivum (Wheat), complete [TC391273]	ref|XP_006656395,1| PREDICTED: calcium-binding protein KIC-like [Oryza brachyantha]
A_99_P186242	0.0212422	0.00429284	-5.55746	-2.47443	5.55746		Rep: Os02g0756800 protein - Oryza sativa subsp, japonica (Rice), partial (12%) [TC449174]	ref|YP_004021746,1| ribosomal protein S3 [Equisetum arvense] gb|ADA63545,1| ribosomal protein S3 (chloroplast) [Equisetum arvense] gb|AEV58377,1| ribosomal protein S3 [Equisetum arvense]
A_99_P289096	0.0240011	0.00573846	-5.54371	-2.47085	5.54371		Rep: 3'-N-debenzoyltaxol N-benzoyltransferase-like - Oryza sativa subsp, japonica (Rice), partial (15%) [TC430970]	gb|ACF21006,1| putrescine N-methyltransferase 2 [Anisodus acutangulus]
A_99_P165947	0.0436183	0.0181291	-5.46658	-2.45064	5.46658		Rep: EF-hand Ca2+binding protein CCD1 - Triticum aestivum (Wheat), complete [TC391273]	ref|XP_003062357,1| predicted protein [Micromonas pusilla CCMP1545] gb|EEH53176,1| predicted protein [Micromonas pusilla CCMP1545]
A_99_P338771	0.00653832	4.62741e-05	-5.43516	-2.44232	5.43516		Rep: C2 domain-containing protein - Hordeum vulgare var, distichum (Two-rowed barley), partial (22%) [TC445562]	N/A
A_99_P315381	0.0262195	0.00696924	-5.41103	-2.4359	5.41103		Rep: Chromosome chr2 scaffold_11, whole genome shotgun sequence - Vitis vinifera (Grape), partial (58%) [TC458805]	dbj|BAJ93880,1| predicted protein [Hordeum vulgare subsp, vulgare]
A_99_P226001	0.0201705	0.00377506	-5.36493	-2.42356	5.36493		TSA: Triticum aestivum cultivar Bobwhite isotig26959,flagleaf mRNA sequence [HP636164]	ref|XP_006441793,1| hypothetical protein CICLE_v10021842mg [Citrus clementina] gb|ESR55033,1| hypothetical protein CICLE_v10021842mg [Citrus clementina]
A_99_P489907	0.0248234	0.00609155	-5.20062	-2.37868	5.20062	LOC100192166	Triticum aestivum cDNA, clone: WT002_H05, cultivar: Chinese Spring [AK331823]	gb|EMS56089,1| hypothetical protein TRIUR3_27334 [Triticum urartu]
A_99_P057636	0.0357647	0.0132271	-5.1074	-2.35259	5.1074		FGAS020534 Triticum aestivum FGAS: Library 5 GATE 7 Triticum aestivum cDNA, mRNA sequence [CK208812]	gb|EMS51602,1| hypothetical protein TRIUR3_04160 [Triticum urartu]
A_99_P261211	0.0164557	0.00238564	-5.0533	-2.33723	5.0533			dbj|BAJ98111,1| predicted protein [Hordeum vulgare subsp, vulgare]
A_99_P500287	0.0127836	0.000963819	-4.94267	-2.30529	4.94267			ref|XP_004146678,1| PREDICTED: APO protein 2, chloroplastic-like [Cucumis sativus] ref|XP_004161867,1| PREDICTED: APO protein 2, chloroplastic-like [Cucumis sativus]
A_99_P500847	0.0284013	0.00831909	-4.91689	-2.29775	4.91689		Rep: ER33 protein - Solanum lycopersicum (Tomato) (Lycopersicon esculentum), partial (63%) [TC432075]	tpg|DAA37165,1| TPA_ putative HLH DNA-binding domain superfamily protein isoform 1 [Zea mays] tpg|DAA37166,1| TPA_ putative HLH DNA-binding domain superfamily protein isoform 2 [Zea mays] Length=126
A_99_P095210	0.0273036	0.00753923	-4.91406	-2.29692	4.91406		WHE4108_G08_N16ZS Wheat salt-stressed root cDNA library Triticum aestivum cDNA clone WHE4108_G08_N16, mRNA sequence [BQ743841]	dbj|BAJ92219,1| predicted protein [Hordeum vulgare subsp, vulgare]
A_99_P057671	0.0415268	0.0168877	-4.84436	-2.27631	4.84436		FGAS081088 Triticum aestivum FGAS: Library 3 Gate 6 Triticum aestivum cDNA, mRNA sequence [DR735418]	dbj|BAJ96673,1| predicted protein [Hordeum vulgare subsp, vulgare] dbj|BAK01096,1| predicted protein [Hordeum vulgare subsp, vulgare]
A_99_P203391	0.0151091	0.00150932	-4.81841	-2.26856	4.81841			gb|ABC69389,1| CYP72A52v1 [Nicotiana tabacum]
A_99_P417382	0.0262118	0.0069272	-4.8098	-2.26598	4.8098		Rep: Os11g0274100 protein - Oryza sativa subsp, japonica (Rice), partial (21%) [TC378449]	dbj|BAJ88667,1| predicted protein [Hordeum vulgare subsp, vulgare]
A_99_P352861	0.0210125	0.00420458	-4.80279	-2.26387	4.80279		Rep: Os02g0756800 protein - Oryza sativa subsp, japonica (Rice), partial (31%) [TC441555]	gb|EMT27501,1| hypothetical protein F775_13138 [Aegilops tauschii]
A_99_P480327	0.0203527	0.00399152	-4.78571	-2.25873	4.78571		Rep: Fatty acid desaturase - Zea mays (Maize), partial (87%) [TC422303]	gb|AFJ66197,1| hypothetical protein 7G9,16 [Boechera stricta]
A_99_P485667	0.0325033	0.011131	-4.77938	-2.25682	4.77938		TSA: Triticum aestivum contig11802,TraeRec mRNA sequence [JP217156]	ref|XP_004289457,1| PREDICTED: ATPase family AAA domain-containing protein At1g05910-like [Fragaria vesca subsp, vesca]
A_99_P313026	0.0154903	0.00189519	-4.75232	-2.24863	4.75232			ref|XP_002950770,1| hypothetical protein VOLCADRAFT_91294 [Volvox carteri f, nagariensis] gb|EFJ48085,1| hypothetical protein VOLCADRAFT_91294 [Volvox carteri f, nagariensis]
A_99_P456107	0.0469978	0.0203795	-4.74252	-2.24565	4.74252			gb|EMT18086,1| hypothetical protein F775_32176 [Aegilops tauschii]
A_99_P435502	0.0168988	0.00270948	-4.72669	-2.24083	4.72669		Rep: Os02g0670500 protein - Oryza sativa subsp, japonica (Rice), partial (26%) [TC392949]	ref|XP_002457819,1| hypothetical protein SORBIDRAFT_03g014360 [Sorghum bicolor] gb|EES02939,1| hypothetical protein SORBIDRAFT_03g014360 [Sorghum bicolor]
A_99_P211546	0.0499699	0.0227339	-4.66449	-2.22172	4.66449		Rep: EF-hand Ca2+binding protein CCD1 - Triticum aestivum (Wheat), partial (94%) [TC392898]	gb|EMS61847,1| Calcium-binding protein KIC [Triticum urartu]
A_99_P045702	0.0485632	0.0217467	-4.64482	-2.21562	4.64482	acT5	Triticum aestivum mRNA for putative acyl transferase 5 (acT5 gene) [AM749046]	N/A
A_99_P261191	0.0202093	0.00386404	-4.64421	-2.21543	4.64421			gb|ABA97480,1| hypothetical protein LOC_Os12g18750 [Oryza sativa Japonica Group]
A_99_P426057	0.020185	0.00380442	-4.64329	-2.21515	4.64329		Rep: WRKY transcription factor - Triticum aestivum (Wheat), partial (45%) [TC385517]	dbj|BAJ98111,1| predicted protein [Hordeum vulgare subsp, vulgare]
A_99_P332911	0.0250058	0.00630847	-4.63652	-2.21304	4.63652		WHE4108_G08_N16ZS Wheat salt-stressed root cDNA library Triticum aestivum cDNA clone WHE4108_G08_N16, mRNA sequence [BQ743841]	dbj|BAJ92219,1| predicted protein [Hordeum vulgare subsp, vulgare]
A_99_P459552	0.0250058	0.00627732	-4.61154	-2.20525	4.61154		Triticum aestivum cDNA, clone: WT012_N15, cultivar: Chinese Spring [AK335416]	ref|XP_006432207,1| hypothetical protein CICLE_v10003965mg [Citrus clementina] gb|ESR45447,1| hypothetical protein CICLE_v10003965mg [Citrus clementina]
A_99_P496507	0.0255813	0.00660743	-4.51197	-2.17376	4.51197		Rep: RRNA intron-encoded homing endonuclease - Oryza sativa (Rice), partial (53%) [TC430188]	ref|XP_002949854,1| hypothetical protein VOLCADRAFT_90307 [Volvox carteri f, nagariensis] gb|EFJ48957,1| hypothetical protein VOLCADRAFT_90307 [Volvox carteri f, nagariensis]
A_99_P222461	0.0464938	0.0200185	-4.45926	-2.15681	4.45926			emb|CAE54591,1| ethylene transcription factor [Fagus sylvatica]
A_99_P364466	0.0226825	0.00512961	-4.39571	-2.1361	4.39571			ref|XP_004980907,1| PREDICTED: putative disease resistance protein At3g14460-like [Setaria italica]
A_99_P262736	0.0319024	0.0107665	-4.39172	-2.13478	4.39172		Rep: Calcium-dependent calmodulin-independent protein kinase isoform 2 - Cicer arietinum (Chickpea) (Garbanzo), partial (62%) [TC411941]	gb|EMS57373,1| Calcium-dependent protein kinase 7 [Triticum urartu]
A_99_P476422	0.021645	0.00447122	-4.38979	-2.13415	4.38979		Rep: Hin1-like protein - Solanum tuberosum (Potato), partial (28%) [TC420203]	gb|AAK26123,1|AC084406_6 putative ubiquitin-conjugating protein [Oryza sativa Japonica Group] gb|AAT85266,1| ubiquitin-conjugating enzyme family protein [Oryza sativa Japonica Group]
A_99_P386582	0.0166121	0.00257328	-4.32998	-2.11436	4.32998		Triticum aestivum cDNA, clone: WT006_F16, cultivar: Chinese Spring [AK333387]	ref|XP_002303620,1| hypothetical protein POPTR_0003s13510g [Populus trichocarpa] gb|EEE78599,1| hypothetical protein POPTR_0003s13510g [Populus trichocarpa]
A_99_P354511	0.0164557	0.00235068	-4.29684	-2.10328	4.29684			emb|CAI93180,1| glycosyltransferase [Triticum aestivum]
A_99_P120449	0.0225474	0.00500168	-4.26582	-2.09282	4.26582			ref|XP_004494767,1| PREDICTED: violaxanthin de-epoxidase, chloroplastic-like isoform X1 [Cicer arietinum]
A_99_P012669	0.0483067	0.0214041	-4.25134	-2.08792	4.25134		FGAS029804 Triticum aestivum FGAS: Library 6 CAP GATE 1 Triticum aestivum cDNA, mRNA sequence [CK217802]	N/A
A_99_P334246	0.0459041	0.0196047	-4.23955	-2.08391	4.23955		Rep: HSF-type DNA-binding domain containing protein, expressed - Oryza sativa subsp, japonica (Rice), partial (67%) [TC432537]	ref|XP_004492204,1| PREDICTED: UPF0361 protein C3orf37 homolog [Cicer arietinum]
A_99_P453952	0.00880151	0.000138968	-4.18525	-2.06531	4.18525	Tamyb7	FGAS021512 Triticum aestivum FGAS: Library 5 GATE 7 Triticum aestivum cDNA, mRNA sequence [CK209733]	dbj|BAE80457,1| myb-related protein [Triticum aestivum]
A_99_P442392	0.0413804	0.0167664	-4.17613	-2.06217	4.17613		MISCREPU2 T,aestivum mitochondrion fMet, 18S, 5S repeat unit DNA, partial (21%) [TC375627]	gb|EPS73844,1| hypothetical protein M569_00907, partial [Genlisea aurea]
A_99_P128310	0.0166121	0.0025483	-4.16512	-2.05836	4.16512	Myb2	FGAS084153 Triticum aestivum FGAS: Library 6 CAP GATE 1 Triticum aestivum cDNA, mRNA sequence [DR738936]	gb|EMT12739,1| Myb-related protein Myb4 [Aegilops tauschii]
A_99_P310946	0.0357647	0.01321	-4.1405	-2.0498	4.1405		Rep: Os08g0205800 protein - Oryza sativa subsp, japonica (Rice), partial (46%) [TC390519]	gb|EMT01395,1| hypothetical protein F775_27544 [Aegilops tauschii]
A_99_P272966	0.0108248	0.000410749	-4.12026	-2.04273	4.12026	Tamyb7	FGAS021512 Triticum aestivum FGAS: Library 5 GATE 7 Triticum aestivum cDNA, mRNA sequence [CK209733]	gb|EEC74141,1| hypothetical protein OsI_09212 [Oryza sativa Indica Group]
A_99_P343741	0.0105142	0.00038205	-4.11866	-2.04217	4.11866			gb|EMT01093,1| hypothetical protein F775_16963 [Aegilops tauschii]
A_99_P489622	0.0309593	0.00996893	-4.11173	-2.03975	4.11173	LOC543182	Triticum aestivum mRNA for zinc-finger protein WZF1, complete cds [D16416]	sp|Q42430,1|ZFP1_WHEAT RecName: Full=Zinc finger protein 1; AltName: Full=WZF1 dbj|BAA03901,1| zinc-finger protein WZF1 [Triticum aestivum] dbj|BAA03902,1| zinc-finger protein WZF1 [Triticum aestivum]
A_99_P013444	0.024519	0.00595582	-4.08098	-2.02892	4.08098		BJ288427 Y, Ogihara unpublished cDNA library, Wh_SL Triticum aestivum cDNA clone whsl14g14 5', mRNA sequence [BJ288427]	ref|NP_001043637,2| Os01g0628700 [Oryza sativa Japonica Group] dbj|BAF05551,2| Os01g0628700, partial [Oryza sativa Japonica Group]
A_99_P308926	0.0127836	0.000844459	-4.04481	-2.01607	4.04481		Rep: FAD binding domain containing protein, expressed - Oryza sativa subsp, japonica (Rice), partial (69%) [TC378719]	gb|EMS68722,1| 3-hydroxybenzoate 6-hydroxylase 1 [Triticum urartu]
A_99_P175879	0.0120927	0.000615379	-4.04105	-2.01473	4.04105	LOC543445	Triticum aestivum glutathione-S-transferase 19E50 mRNA, complete cds [AY064481]	emb|CAD29479,1| glutathione transferase F6 [Triticum aestivum] emb|CAD29575,1| glutathione transferase [Triticum aestivum]
A_99_P433567	0.0387382	0.0150402	-3.98022	-1.99285	3.98022		Triticum aestivum cDNA, clone: WT011_B15, cultivar: Chinese Spring [AK334797]	gb|EMS49294,1| Cysteine-rich receptor-like protein kinase 41 [Triticum urartu]
A_99_P379772	0.0284013	0.00832285	-3.93071	-1.97479	3.93071		Rep: Integrase, catalytic region - Methylobacterium chloromethanicum CM4, partial (9%) [TC443129]	gb|EMT25826,1| Heat stress transcription factor A-4d [Aegilops tauschii]
A_99_P202341	0.0226825	0.00514835	-3.91263	-1.96814	3.91263		Rep: Mll7708 protein - Rhizobium loti (Mesorhizobium loti), partial (6%) [TC453887]	dbj|BAJ92079,1| predicted protein [Hordeum vulgare subsp, vulgare]
A_99_P088835	0.00880151	9.40131e-05	-3.88757	-1.95887	3.88757		FGAS083226 Triticum aestivum FGAS: Library 6 CAP GATE 1 Triticum aestivum cDNA, mRNA sequence [DR738009]	###############################################################################################################################################################################################################################################################
A_99_P646031	0.0164557	0.00239501	-3.86604	-1.95086	3.86604	LOC100037568	Triticum aestivum fasciclin-like protein FLA5 mRNA, complete cds [DQ872378]	ref|XP_006370341,1| hypothetical protein POPTR_0001s41810g [Populus trichocarpa] gb|ERP66910,1| hypothetical protein POPTR_0001s41810g [Populus trichocarpa]
A_99_P498457	0.0151968	0.00169699	-3.832	-1.9381	3.832		Triticum aestivum cDNA, clone: WT006_P14, cultivar: Chinese Spring [AK333639]	gb|EMT10118,1| NAD(P)H-dependent 6'-deoxychalcone synthase [Aegilops tauschii]
A_99_P292611	0.0383378	0.0148275	-3.81593	-1.93203	3.81593			gb|EYU26596,1| hypothetical protein MIMGU_mgv1a007670mg [Mimulus guttatus]
A_99_P254996	0.0457965	0.0195131	-3.78464	-1.92016	3.78464			dbj|BAJ95137,1| predicted protein [Hordeum vulgare subsp, vulgare]
A_99_P256776	0.0151091	0.001607	-3.69279	-1.88471	3.69279		Triticum aestivum cDNA, clone: WT006_P14, cultivar: Chinese Spring [AK333639]	ref|XP_002450281,1| hypothetical protein SORBIDRAFT_05g003140 [Sorghum bicolor] gb|EES09269,1| hypothetical protein SORBIDRAFT_05g003140 [Sorghum bicolor]
A_99_P280431	0.0304532	0.00947219	-3.65733	-1.87079	3.65733			ref|NP_001142087,1| uncharacterized protein LOC100274249 [Zea mays] gb|ACF87608,1| unknown [Zea mays] gb|AFW64197,1| hypothetical protein ZEAMMB73_640112 [Zea mays]
A_99_P491897	0.0212512	0.00431583	-3.61176	-1.8527	3.61176		Triticum aestivum cDNA, clone: SET5_L23, cultivar: Chinese Spring [AK330965]	dbj|BAJ97341,1| predicted protein [Hordeum vulgare subsp, vulgare]
A_99_P498692	0.0319024	0.0107305	-3.58618	-1.84245	3.58618		Rep: Glycosyltransferase - Sorghum bicolor (Sorghum) (Sorghum vulgare), partial (29%) [TC431138]	gb|EMT04982,1| hypothetical protein F775_23240 [Aegilops tauschii]
A_99_P489217	0.0309593	0.00990565	-3.58145	-1.84054	3.58145		Rep: Arginine decarboxylase - Oryza sativa subsp, japonica (Rice), partial (22%) [TC426758]	ref|XP_003081282,1| HUA enhancer 2 (ISS) [Ostreococcus tauri] emb|CAL55451,1| HUA enhancer 2 (ISS) [Ostreococcus tauri]
A_99_P148647	0.02219	0.00483785	-3.57848	-1.83935	3.57848		Rep: WRKY transcription factor - Triticum aestivum (Wheat), partial (62%) [TC427131]	gb|EMS56089,1| hypothetical protein TRIUR3_27334 [Triticum urartu]
A_99_P391612	0.0154903	0.00193566	-3.55405	-1.82947	3.55405		Rep: Chromosome undetermined scaffold_130, whole genome shotgun sequence - Vitis vinifera (Grape), partial (14%) [TC438813]	ref|XP_007023517,1| Uncharacterized protein TCM_027551 [Theobroma cacao] gb|EOY26139,1| Uncharacterized protein TCM_027551 [Theobroma cacao]
A_99_P345306	0.0426988	0.0176193	-3.5377	-1.82281	3.5377		FGAS015702 Triticum aestivum FGAS: Library 4 Gate 8 Triticum aestivum cDNA, mRNA sequence [CK163085]	gb|EMT06900,1| hypothetical protein F775_30361 [Aegilops tauschii]
A_99_P518362	0.0393166	0.0153626	-3.50811	-1.81069	3.50811		Rep: Zinc finger protein 1 - Triticum aestivum (Wheat), partial (60%) [TC439770]	N/A
A_99_P275366	0.0373939	0.0143321	-3.4997	-1.80723	3.4997			emb|CAI93180,1| glycosyltransferase [Triticum aestivum]
A_99_P255006	0.0493288	0.0223931	-3.46903	-1.79453	3.46903			dbj|BAJ95137,1| predicted protein [Hordeum vulgare subsp, vulgare]
A_99_P501312	0.0293908	0.00882162	-3.44939	-1.78634	3.44939		Rep: Expressed protein - Oryza sativa subsp, japonica (Rice), partial (43%) [TC432289]	dbj|BAJ92219,1| predicted protein [Hordeum vulgare subsp, vulgare]
A_99_P127580	0.0323881	0.011026	-3.4306	-1.77846	3.4306		wre1n,pk0003,e2 wre1n Triticum aestivum cDNA clone wre1n,pk0003,e2 5' end, mRNA sequence [CA637855]	ref|NP_001048741,1| Os03g0114100 [Oryza sativa Japonica Group] dbj|BAF10655,1| Os03g0114100, partial [Oryza sativa Japonica Group]
A_99_P052266	0.0365174	0.0137657	-3.422	-1.77484	3.422		wre1n,pk0040,f9 wre1n Triticum aestivum cDNA clone wre1n,pk0040,f9 5' end, mRNA sequence [CA641136]	ref|XP_006362066,1| PREDICTED: subtilisin-like protease-like [Solanum tuberosum]
A_99_P289106	0.0469978	0.0203992	-3.41368	-1.77133	3.41368			gb|EMT07508,1| hypothetical protein F775_32402 [Aegilops tauschii]
A_99_P219611	0.0248395	0.00617843	-3.40246	-1.76658	3.40246		Rep: Fatty acid desaturase - Zea mays (Maize), partial (16%) [TC410613]	ref|XP_006354978,1| PREDICTED: sacsin-like [Solanum tuberosum]
A_99_P479147	0.0108248	0.000414886	-3.38844	-1.76062	3.38844		Rep: Transcription factor Myb2 - Triticum aestivum (Wheat), partial (69%) [TC421665]	gb|ABA94124,1| transposon protein, putative, Mutator sub-class [Oryza sativa Japonica Group]
A_99_P209036	0.0182468	0.00319704	-3.36743	-1.75165	3.36743			emb|CAQ58078,1| lipoxygenase [Capsicum annuum]
A_99_P456762	0.0217666	0.00456135	-3.36413	-1.75023	3.36413			gb|EMS56558,1| hypothetical protein TRIUR3_26532 [Triticum urartu]
A_99_P176931	0.029678	0.00907832	-3.29321	-1.7195	3.29321	WRKY53-a	Triticum aestivum WRKY14 transcription factor mRNA, complete cds [EU665427]	gb|ACD80359,1| WRKY14 transcription factor [Triticum aestivum]
A_99_P219601	0.0323881	0.0110251	-3.28522	-1.71599	3.28522		FGAS016156 Triticum aestivum FGAS: Library 4 Gate 8 Triticum aestivum cDNA, mRNA sequence [CK163527]	ref|XP_006354978,1| PREDICTED: sacsin-like [Solanum tuberosum]
A_99_P272971	0.00910672	0.000295511	-3.27439	-1.71123	3.27439		Rep: Transcription factor Myb2 - Triticum aestivum (Wheat), partial (79%) [TC384792]	gb|AAT37168,1| transcription factor Myb2 [Triticum aestivum]
A_99_P340111	0.0343522	0.0123245	-3.25732	-1.70368	3.25732		Rep: 50S ribosomal protein L28, chloroplast precursor - Arabidopsis thaliana (Mouse-ear cress), partial (28%) [TC439892]	dbj|BAJ91164,1| predicted protein [Hordeum vulgare subsp, vulgare] dbj|BAK07980,1| predicted protein [Hordeum vulgare subsp, vulgare]
A_99_P195998	0.0478557	0.0210336	-3.20537	-1.68049	3.20537	Taxi-III	Triticum aestivum Taxi-III mRNA for xylanase inhibitor TAXI-III, complete cds [AB114627]	dbj|BAD72882,1| xylanase inhibitor TAXI-IV [Triticum aestivum]
A_99_P302322	0.0375472	0.0144283	-3.15162	-1.65609	3.15162		Triticum aestivum cDNA, clone: SET5_N09, cultivar: Chinese Spring [AK331001]	dbj|BAK04136,1| predicted protein [Hordeum vulgare subsp, vulgare]
A_99_P308671	0.0164655	0.00241679	-3.13051	-1.6464	3.13051			gb|EMT32162,1| hypothetical protein F775_52190 [Aegilops tauschii]
A_99_P337261	0.0388906	0.0151232	-3.06805	-1.61732	3.06805		Rep: Chromosome chr13 scaffold_48, whole genome shotgun sequence - Vitis vinifera (Grape), partial (21%) [TC410325]	gb|EYU46550,1| hypothetical protein MIMGU_mgv1a000206mg [Mimulus guttatus]
A_99_P158542	0.0414377	0.0168308	-3.04544	-1.60665	3.04544		FGAS016156 Triticum aestivum FGAS: Library 4 Gate 8 Triticum aestivum cDNA, mRNA sequence [CK163527]	ref|XP_002945888,1| hypothetical protein VOLCADRAFT_86312 [Volvox carteri f, nagariensis] gb|EFJ52883,1| hypothetical protein VOLCADRAFT_86312 [Volvox carteri f, nagariensis]
A_99_P302326	0.0369554	0.0139985	-3.02166	-1.59534	3.02166		Triticum aestivum cDNA, clone: SET5_N09, cultivar: Chinese Spring [AK331001]	ref|XP_003058981,1| predicted protein [Micromonas pusilla CCMP1545] gb|EEH57436,1| predicted protein [Micromonas pusilla CCMP1545]
A_99_P048444	0.0471052	0.0205162	-3.01765	-1.59343	3.01765		Rep: Os06g0729900 protein - Oryza sativa subsp, japonica (Rice), partial (59%) [TC425138]	gb|KCW70813,1| hypothetical protein EUGRSUZ_F03962 [Eucalyptus grandis]
A_99_P553127	0.0468671	0.0202959	-2.99384	-1.582	2.99384		Rep: Chromosome chr1 scaffold_75, whole genome shotgun sequence - Vitis vinifera (Grape), partial (89%) [TC453455]	gb|EMS61978,1| hypothetical protein TRIUR3_19930 [Triticum urartu] gb|EMT04073,1| hypothetical protein F775_11885 [Aegilops tauschii]
A_99_P305341	0.0127836	0.000915174	-2.97107	-1.57098	2.97107			dbj|BAJ97341,1| predicted protein [Hordeum vulgare subsp, vulgare]
A_99_P528332	0.0408454	0.0164561	-2.97087	-1.57089	2.97087			gb|AGQ04324,1| SAP1, partial [Oryza officinalis]
A_99_P461822	0.0311358	0.0101668	-2.94298	-1.55728	2.94298			N/A
A_99_P546837	0.0226825	0.00513238	-2.92596	-1.54891	2.92596		Rep: Os09g0343500 protein - Oryza sativa subsp, japonica (Rice), partial (8%) [TC451035]	dbj|BAJ92926,1| predicted protein [Hordeum vulgare subsp, vulgare]
A_99_P161307	0.0162527	0.00228546	-2.92413	-1.54801	2.92413	NAC2	Triticum aestivum NAC domain transcription factor (NAC2) mRNA, complete cds [AY625683]	gb|AAU08786,1| NAC domain transcription factor [Triticum aestivum] gb|ADE59455,1| NAC transcription factor 2A [Triticum aestivum] gb|AEX60737,1| stress-induced NAC transcription factor [Triticum aestivum]
A_99_P257451	0.0250058	0.00630804	-2.91391	-1.54296	2.91391			ref|XP_007152074,1| hypothetical protein PHAVU_004G099900g [Phaseolus vulgaris] gb|ESW24068,1| hypothetical protein PHAVU_004G099900g [Phaseolus vulgaris]
A_99_P445232	0.0221812	0.00481385	-2.88519	-1.52866	2.88519		FGAS062528 Triticum aestivum FGAS: Library 2 Gate 3 Triticum aestivum cDNA, mRNA sequence [CV768137]	ref|XP_003602454,1| N-acetyltransferase, putative [Medicago truncatula] gb|AES72705,1| N-acetyltransferase, putative [Medicago truncatula]
A_99_P412687	0.0225474	0.00505044	-2.86921	-1.52065	2.86921			gb|EMT02285,1| hypothetical protein F775_30854 [Aegilops tauschii]
A_99_P308676	0.0467425	0.0201721	-2.86751	-1.5198	2.86751			N/A
A_99_P425752	0.0162527	0.00226414	-2.85099	-1.51146	2.85099	NAC2	Triticum aestivum NAC domain transcription factor (NAC2) mRNA, complete cds [AY625683]	ref|XP_004962208,1| PREDICTED: pentatricopeptide repeat-containing protein At4g02750-like isoform X1 [Setaria italica]
A_99_P258411	0.0117343	0.000549044	-2.83882	-1.50529	2.83882		Rep: Cold induced protein-like - Oryza sativa subsp, japonica (Rice), partial (63%) [TC378326]	gb|EMS48744,1| hypothetical protein TRIUR3_08076 [Triticum urartu]
A_99_P229836	0.029678	0.00904908	-2.79981	-1.48533	2.79981		Rep: Arginine decarboxylase - Oryza sativa subsp, japonica (Rice), partial (22%) [TC426758]	gb|EMS56348,1| Arginine decarboxylase 1 [Triticum urartu]
A_99_P522472	0.0363954	0.0136596	-2.784	-1.47716	2.784			gb|AHL43431,1| rhomboid [Triticum aestivum]
A_99_P037259	0.0367721	0.0138953	-2.78077	-1.47548	2.78077		AL827718 p:638 Triticum aestivum cDNA clone C06_p638_plate_15, mRNA sequence [AL827718]	dbj|BAJ92160,1| predicted protein [Hordeum vulgare subsp, vulgare] dbj|BAJ97504,1| predicted protein [Hordeum vulgare subsp, vulgare]
A_99_P217336	0.0378809	0.0146131	-2.77755	-1.47381	2.77755		Rep: 50S ribosomal protein L34 - Aquifex aeolicus, partial (36%) [TC431453]	ref|XP_002885362,1| hypothetical protein ARALYDRAFT_898440 [Arabidopsis lyrata subsp, lyrata] gb|EFH61621,1| hypothetical protein ARALYDRAFT_898440 [Arabidopsis lyrata subsp, lyrata]
A_99_P081500	0.0262118	0.00694762	-2.7608	-1.46509	2.7608		WNEL23c10 Wheat EST endosperm library Triticum aestivum cDNA clone WNEL23c10 5' similar to Unknown Function, mRNA sequence [CV065516]	ref|XP_001416697,1| predicted protein [Ostreococcus lucimarinus CCE9901] gb|ABO94990,1| predicted protein [Ostreococcus lucimarinus CCE9901]
A_99_P318056	0.0311772	0.0102113	-2.74964	-1.45924	2.74964		Rep: Chromosome chr1 scaffold_75, whole genome shotgun sequence - Vitis vinifera (Grape), partial (89%) [TC400162]	gb|EMS61978,1| hypothetical protein TRIUR3_19930 [Triticum urartu] gb|EMT04073,1| hypothetical protein F775_11885 [Aegilops tauschii]
A_99_P232346	0.0232187	0.00546662	-2.7489	-1.45886	2.7489		Rep: NAC transcription factor - Hordeum vulgare var, distichum (Two-rowed barley), partial (35%) [TC391577]	gb|ABD32378,2| hypothetical protein MtrDRAFT_AC150244g35v2 [Medicago truncatula]
A_99_P208631	0.0203527	0.00397173	-2.74871	-1.45875	2.74871			gb|EMT13152,1| hypothetical protein F775_31310 [Aegilops tauschii]
A_99_P415447	0.0309593	0.00995256	-2.74456	-1.45657	2.74456		Rep: Chromosome chr4 scaffold_6, whole genome shotgun sequence - Vitis vinifera (Grape), partial (13%) [TC376861]	N/A
A_99_P389497	0.0339595	0.0119171	-2.73219	-1.45006	2.73219			ref|XP_002535129,1| conserved hypothetical protein [Ricinus communis] gb|EEF27256,1| conserved hypothetical protein [Ricinus communis]
A_99_P355711	0.0283008	0.00815049	-2.72126	-1.44427	2.72126		Rep: Somatic embryogenesis related protein - Dactylis glomerata (Orchard grass) (Cock's-foot grass), partial (95%) [TC404051]	gb|EMT03756,1| Protein WRKY1 [Aegilops tauschii]
A_99_P396582	0.0151968	0.00170198	-2.72107	-1.44417	2.72107		Triticum aestivum cDNA, clone: SET3_D05, cultivar: Chinese Spring [AK336086]	ref|XP_002955411,1| DEAD-box RNA helicase, ATP-dependent [Volvox carteri f, nagariensis] gb|EFJ43482,1| DEAD-box RNA helicase, ATP-dependent [Volvox carteri f, nagariensis]
A_99_P175934	0.0305874	0.00954258	-2.70566	-1.43598	2.70566		Rep: Membrane protein-like - Burkholderia ambifaria MC40-6, partial (8%) [TC433997]	ref|XP_006594572,1| PREDICTED: glycogen phosphorylase 1-like isoform X2 [Glycine max]
A_99_P318916	0.0279632	0.00793382	-2.69127	-1.42829	2.69127		Rep: UDP-glucuronic acid 4-epimerase - Zea mays (Maize), partial (21%) [TC452779]	ref|XP_006595365,1| PREDICTED: uncharacterized protein LOC102664778 [Glycine max]
A_99_P205411	0.0283008	0.00815638	-2.6657	-1.41451	2.6657		Rep: Expressed protein - Oryza sativa subsp, japonica (Rice), partial (93%) [TC450845]	emb|CBI20009,3| unnamed protein product [Vitis vinifera]
A_99_P352206	0.0307182	0.00967877	-2.66114	-1.41204	2.66114		TSA: Triticum aestivum cultivar Bobwhite isotig14922,flagleaf mRNA sequence [HP624136]	gb|EMT12330,1| Wall-associated receptor kinase 1 [Aegilops tauschii]
A_99_P232376	0.0113247	0.000507327	-2.64332	-1.40235	2.64332	NAC6	Triticum aestivum cDNA, clone: WT004_D20, cultivar: Chinese Spring [AK332540]	emb|CBI18492,3| unnamed protein product [Vitis vinifera]
A_99_P152607	0.0154903	0.00197081	-2.60223	-1.37975	2.60223		CJ858389 Y, Ogihara unpublished cDNA library, whsctal Triticum aestivum cDNA clone whsctal4f18 5', mRNA sequence [CJ858389]	ref|XP_002533426,1| kinase, putative [Ricinus communis] gb|EEF28957,1| kinase, putative [Ricinus communis]
A_99_P232341	0.0176081	0.00291861	-2.60191	-1.37957	2.60191		Rep: NAC transcription factor - Hordeum vulgare var, distichum (Two-rowed barley), partial (37%) [TC396012]	gb|EMT15962,1| Ent-kaurene synthase-like protein 3 [Aegilops tauschii]
A_99_P458357	0.0126712	0.000784966	-2.59404	-1.3752	2.59404		Rep: NAC transcription factor - Hordeum vulgare var, distichum (Two-rowed barley), partial (98%) [TC409768]	emb|CBI18492,3| unnamed protein product [Vitis vinifera]
A_99_P247801	0.0207944	0.00411955	-2.58431	-1.36978	2.58431		Triticum aestivum cDNA, clone: SET4_C19, cultivar: Chinese Spring [AK330319]	ref|XP_004487227,1| PREDICTED: uncharacterized protein LOC101496462 [Cicer arietinum]
A_99_P332981	0.0279632	0.00793272	-2.58344	-1.36929	2.58344		Rep: Allene oxide synthase - Glycine max (Soybean), partial (32%) [TC393203]	dbj|BAJ97490,1| predicted protein [Hordeum vulgare subsp, vulgare]
A_99_P131905	0.0484715	0.0216662	-2.58027	-1.36752	2.58027		Rep: Mitogen-activated protein kinase MAPK1d - Triticum aestivum (Wheat), partial (19%) [TC395336]	gb|EMT15146,1| Dehydrin DHN3 [Aegilops tauschii]
A_99_P439542	0.019315	0.00352843	-2.57162	-1.36268	2.57162		Rep: NAC transcription factor - Hordeum vulgare var, distichum (Two-rowed barley), partial (37%) [TC396012]	ref|XP_004230862,1| PREDICTED: phospholipase A-2-activating protein-like [Solanum lycopersicum]
A_99_P363086	0.041759	0.0170237	-2.57052	-1.36206	2.57052			emb|CAI93180,1| glycosyltransferase [Triticum aestivum]
A_99_P347181	0.0253062	0.00649975	-2.56675	-1.35994	2.56675		Rep: Harpin-induced protein 1 containing protein, expressed - Oryza sativa subsp, japonica (Rice), partial (67%) [TC441467]	dbj|BAK01664,1| predicted protein [Hordeum vulgare subsp, vulgare] dbj|BAJ91596,1| predicted protein [Hordeum vulgare subsp, vulgare]
A_99_P051526	0.026114	0.00682422	-2.5466	-1.34857	2.5466		CJ799742 Y, Ogihara unpublished cDNA library, whsct Triticum aestivum cDNA clone whsct18b01 5', mRNA sequence [CJ799742]	gb|EMS62197,1| Phenylalanine ammonia-lyase [Triticum urartu]
A_99_P292561	0.0154903	0.00191441	-2.54458	-1.34743	2.54458		Rep: SNAP-34 - Hordeum vulgare var, distichum (Two-rowed barley), partial (87%) [TC375443]	gb|EMS62124,1| SNAP25 homologous protein SNAP33 [Triticum urartu]
A_99_P345181	0.0263231	0.0070581	-2.54344	-1.34678	2.54344			gb|EMS54580,1| hypothetical protein TRIUR3_19692 [Triticum urartu]
A_99_P555867	0.0202093	0.00388411	-2.53579	-1.34243	2.53579			gb|AAX94996,1| Protein kinase domain, putative [Oryza sativa Japonica Group] gb|ABA95430,1| Protein kinase domain containing protein [Oryza sativa Japonica Group]
A_99_P574312	0.0306581	0.00964456	-2.53083	-1.33961	2.53083		Triticum aestivum cDNA, clone: WT010_C14, cultivar: Chinese Spring [AK334515]	N/A
A_99_P272321	0.00880151	0.000194783	-2.52994	-1.3391	2.52994		Triticum aestivum cDNA, clone: SET2_K08, cultivar: Chinese Spring [AK335769]	ref|XP_003626057,1| Peptide chain release factor [Medicago truncatula] gb|AES82275,1| Peptide chain release factor [Medicago truncatula]
A_99_P290231	0.0151091	0.00154925	-2.52951	-1.33886	2.52951			ref|XP_003563989,1| PREDICTED: uncharacterized protein LOC100841206 [Brachypodium distachyon]
A_99_P442837	0.020185	0.00383806	-2.52728	-1.33759	2.52728	LOC543445	Triticum aestivum glutathione-S-transferase 19E50 mRNA, complete cds [AY064481]	ref|XP_004248957,1| PREDICTED: protein BONZAI 3-like [Solanum lycopersicum]
A_99_P337841	0.0204389	0.0040186	-2.51673	-1.33155	2.51673		Rep: Efflux transporter, RND family, MFP subunit - Burkholderia thailandensis (strain E264 / ATCC 700388 / DSM 13276 /CIP 106301), partial (14%) [TC418808]	gb|AAX96202,1| hypothetical protein LOC_Os11g12580 [Oryza sativa Japonica Group] gb|ABA92189,1| hypothetical protein LOC_Os11g12580 [Oryza sativa Japonica Group]
A_99_P366737	0.0198594	0.00367358	-2.50653	-1.32569	2.50653			gb|EMS62197,1| Phenylalanine ammonia-lyase [Triticum urartu]
A_99_P280801	0.0296086	0.00895146	-2.49737	-1.32041	2.49737		Rep: Calmodulin-related protein - Oryza sativa subsp, japonica (Rice), partial (51%) [TC411447]	ref|XP_002269383,2| PREDICTED: uncharacterized protein LOC100253928 [Vitis vinifera]
A_99_P161272	0.0281853	0.00802489	-2.48958	-1.3159	2.48958	Glc1	Triticum aestivum beta 1,3-glucanase (Glc1) mRNA, complete cds [U30323]	gb|EMT31321,1| Glucan endo-1,3-beta-glucosidase [Aegilops tauschii]
A_99_P526307	0.0273833	0.00760796	-2.47545	-1.30769	2.47545		EST236 Stress treated wheat cDNA libraries from the FGAS project Triticum aestivum cDNA clone 10,1,5, mRNA sequence [DY761340]	dbj|BAJ95289,1| predicted protein [Hordeum vulgare subsp, vulgare]
A_99_P258561	0.0483067	0.0214212	-2.45069	-1.29319	2.45069		Rep: CBL-interacting protein kinase 24 - Populus trichocarpa (Western balsam poplar) (Populus balsamiferasubsp, trichocarpa), partial (55%) [TC374004]	gb|EMT04671,1| hypothetical protein F775_20290 [Aegilops tauschii]
A_99_P076120	0.0441708	0.018532	-2.44001	-1.28689	2.44001		Triticum aestivum cDNA, clone: WT013_C09, cultivar: Chinese Spring [AK335536]	gb|EMT18041,1| hypothetical protein F775_52047 [Aegilops tauschii]
A_99_P312266	0.0305874	0.00959187	-2.43999	-1.28688	2.43999		Rep: GRAS family transcription factor containing protein, expressed - Oryza sativa subsp, japonica (Rice), partial (22%) [TC404123]	N/A
A_99_P245496	0.0344633	0.0124881	-2.43257	-1.28248	2.43257		Rep: AG-motif binding protein-1 - Nicotiana tabacum (Common tobacco), partial (9%) [TC384283]	gb|EMS65328,1| GATA transcription factor 11 [Triticum urartu]
A_99_P354631	0.0248395	0.00619442	-2.42571	-1.27841	2.42571		Rep: Triacylglycerol lipase like protein - Arabidopsis thaliana (Mouse-ear cress), partial (13%) [TC425602]	dbj|BAK07023,1| predicted protein [Hordeum vulgare subsp, vulgare] dbj|BAK00183,1| predicted protein [Hordeum vulgare subsp, vulgare]
A_99_P292546	0.0154903	0.0020375	-2.42468	-1.27779	2.42468			gb|AFQ60149,1| SNAP34 [Triticum aestivum]
A_99_P400502	0.0323881	0.0110583	-2.42348	-1.27708	2.42348		Rep: HSF-type DNA-binding domain containing protein, expressed - Oryza sativa subsp, japonica (Rice), partial (43%) [TC423045]	gb|EMS60951,1| Heat stress transcription factor A-2d [Triticum urartu]
A_99_P429057	0.0267396	0.00726721	-2.40262	-1.26461	2.40262		Rep: Ethylene-responsive element binding protein 2 - Triticum aestivum (Wheat), partial (18%) [TC387694]	emb|CAI93180,1| glycosyltransferase [Triticum aestivum]
A_99_P547882	0.0246201	0.00600565	-2.39939	-1.26267	2.39939			N/A
A_99_P416737	0.0355875	0.0130907	-2.39564	-1.26041	2.39564			gb|EMS67452,1| Secologanin synthase [Triticum urartu]
A_99_P531717	0.0343522	0.0123643	-2.39471	-1.25985	2.39471			###############################################################################################################################################################################################################################################################
A_99_P245506	0.0331309	0.0114113	-2.39375	-1.25927	2.39375		Rep: Predicted protein - Physcomitrella patens subsp, patens, partial (7%) [TC460252]	N/A
A_99_P018584	0.0341306	0.0120403	-2.38617	-1.2547	2.38617		Rep: Os03g0803600 protein - Oryza sativa subsp, japonica (Rice), partial (22%) [TC383926]	gb|EMS67280,1| putative beta-1,3-galactosyltransferase 19 [Triticum urartu]
A_99_P441822	0.0229841	0.00531343	-2.38538	-1.25422	2.38538		Rep: AG-motif binding protein-1 - Nicotiana tabacum (Common tobacco), partial (9%) [TC384283]	ref|XP_002979481,1| hypothetical protein SELMODRAFT_419221 [Selaginella moellendorffii] gb|EFJ19370,1| hypothetical protein SELMODRAFT_419221 [Selaginella moellendorffii]
A_99_P443012	0.0432154	0.0179186	-2.37545	-1.2482	2.37545		Rep: Copine-like protein - Oryza sativa subsp, japonica (Rice), partial (21%) [TC398669]	gb|EMS51733,1| hypothetical protein TRIUR3_19249 [Triticum urartu]
A_99_P251946	0.0120589	0.000597898	-2.35112	-1.23335	2.35112		Rep: Os05g0407100 protein - Oryza sativa subsp, japonica (Rice), partial (74%) [TC415290]	dbj|BAK03654,1| predicted protein [Hordeum vulgare subsp, vulgare] dbj|BAK08228,1| predicted protein [Hordeum vulgare subsp, vulgare]
A_99_P480982	0.0467713	0.0202078	-2.34388	-1.2289	2.34388		Rep: Syntaxin - Hordeum vulgare var, distichum (Two-rowed barley), partial (59%) [TC422683]	gb|EMT01606,1| Syntaxin-124 [Aegilops tauschii]
A_99_P441142	0.0127836	0.000956597	-2.33934	-1.2261	2.33934		FGAS018018 Triticum aestivum FGAS: Library 5 GATE 7 Triticum aestivum cDNA, mRNA sequence [CK206425]	dbj|BAJ85757,1| predicted protein [Hordeum vulgare subsp, vulgare] dbj|BAK00957,1| predicted protein [Hordeum vulgare subsp, vulgare]
A_99_P429777	0.0164557	0.0023461	-2.30349	-1.20382	2.30349		Triticum aestivum cDNA, clone: SET5_A09, cultivar: Chinese Spring [AK330672]	ref|XP_003557826,1| PREDICTED: villin-2-like [Brachypodium distachyon]
A_99_P144213	0.0252088	0.00643708	-2.29967	-1.20143	2.29967		Rep: Efflux transporter, RND family, MFP subunit - Burkholderia thailandensis (strain E264 / ATCC 700388 / DSM 13276 /CIP 106301), partial (14%) [TC418808]	gb|EMT08068,1| hypothetical protein F775_19599 [Aegilops tauschii]
A_99_P004116	0.00880151	0.000141702	-2.29014	-1.19543	2.29014		FGAS018018 Triticum aestivum FGAS: Library 5 GATE 7 Triticum aestivum cDNA, mRNA sequence [CK206425]	gb|AAX94996,1| Protein kinase domain, putative [Oryza sativa Japonica Group] gb|ABA95430,1| Protein kinase domain containing protein [Oryza sativa Japonica Group]
A_99_P255901	0.0387113	0.0150105	-2.28611	-1.1929	2.28611		Rep: Protein kinase 1 - Aegilops tauschii (Tausch's goatgrass) (Aegilops squarrosa), complete [TC386877]	gb|AHC00227,1| SNF1-type serine-threonine protein kinase [Triticum polonicum]
A_99_P464542	0.0127836	0.000885951	-2.2788	-1.18827	2.2788			dbj|BAJ95182,1| predicted protein [Hordeum vulgare subsp, vulgare] dbj|BAJ97475,1| predicted protein [Hordeum vulgare subsp, vulgare]
A_99_P127030	0.0406414	0.0163086	-2.27851	-1.18809	2.27851		FGAS001093 Triticum aestivum FGAS: Library 2 Gate 3 Triticum aestivum cDNA, mRNA sequence [DR741161]	gb|EMT18411,1| hypothetical protein F775_32222 [Aegilops tauschii]
A_99_P569262	0.0283008	0.00812284	-2.2658	-1.18002	2.2658			gb|AAP53887,2| retrotransposon protein, putative, Ty1-copia subclass [Oryza sativa Japonica Group]
A_99_P011519	0.021269	0.00433003	-2.26455	-1.17922	2.26455		Rep: CBL-interacting protein kinase 24 - Populus trichocarpa (Western balsam poplar) (Populus balsamiferasubsp, trichocarpa), partial (81%) [TC373922]	tpg|DAA59544,1| TPA_ putative CBL-interacting protein kinase family protein [Zea mays]
A_99_P313596	0.0284013	0.00831541	-2.25941	-1.17595	2.25941			emb|CAI93180,1| glycosyltransferase [Triticum aestivum]
A_99_P455217	0.0361781	0.013506	-2.25865	-1.17546	2.25865			gb|EMT23877,1| Rhomboid family member 1 [Aegilops tauschii]
A_99_P274866	0.0205798	0.00405655	-2.25147	-1.17087	2.25147		Triticum aestivum cDNA, clone: SET5_A09, cultivar: Chinese Spring [AK330672]	dbj|BAJ95004,1| predicted protein [Hordeum vulgare subsp, vulgare]
A_99_P062653	0.0199681	0.0037173	-2.24426	-1.16624	2.24426			ref|XP_004248957,1| PREDICTED: protein BONZAI 3-like [Solanum lycopersicum]
A_99_P505027	0.0235265	0.0055625	-2.24256	-1.16514	2.24256			ref|XP_002301465,2| hypothetical protein POPTR_0002s18630g [Populus trichocarpa] gb|EEE80738,2| hypothetical protein POPTR_0002s18630g [Populus trichocarpa]
A_99_P173004	0.0154903	0.00196517	-2.22681	-1.15498	2.22681		Triticum aestivum cDNA, clone: WT003_D14, cultivar: Chinese Spring [AK332131]	gb|EMT17990,1| Monothiol glutaredoxin-S5 [Aegilops tauschii]
A_99_P246906	0.0154903	0.00208485	-2.21408	-1.14671	2.21408		Triticum aestivum cDNA, clone: WT003_D14, cultivar: Chinese Spring [AK332131]	gb|AFW80802,1| hypothetical protein ZEAMMB73_472821 [Zea mays]
A_99_P262746	0.0284013	0.00832672	-2.2138	-1.14652	2.2138			gb|EMS57373,1| Calcium-dependent protein kinase 7 [Triticum urartu]
A_99_P481797	0.0255813	0.00661132	-2.20926	-1.14356	2.20926		Rep: Protein HVA22 - Hordeum vulgare (Barley), partial (64%) [TC423074]	gb|EMT16019,1| hypothetical protein F775_43960 [Aegilops tauschii]
A_99_P246876	0.0154903	0.00200395	-2.20002	-1.13752	2.20002		Triticum aestivum cDNA, clone: WT003_D14, cultivar: Chinese Spring [AK332131]	N/A
A_99_P290226	0.0164655	0.00242598	-2.18668	-1.12874	2.18668		Triticum aestivum cDNA, clone: WT004_F21, cultivar: Chinese Spring [AK332590]	gb|EMS60761,1| hypothetical protein TRIUR3_18834 [Triticum urartu]
A_99_P533537	0.019785	0.00363397	-2.1795	-1.124	2.1795		Rep: Predicted protein - Monosiga brevicollis MX1, partial (5%) [TC445938]	gb|EEC82710,1| hypothetical protein OsI_27382 [Oryza sativa Indica Group]
A_99_P118455	0.0127836	0.000940127	-2.16043	-1.11132	2.16043		CJ688773 Y,Ogihara unpublished cDNA library Wh_RDr Triticum aestivum cDNA clone whrd15f16 5', mRNA sequence [CJ688773]	ref|XP_003083971,1| delta 12 fatty acid desaturase (ISS) [Ostreococcus tauri] emb|CAL57938,1| delta 12 fatty acid desaturase (ISS) [Ostreococcus tauri]
A_99_P329116	0.0378194	0.0145517	-2.14816	-1.1031	2.14816		Rep: Os08g0205800 protein - Oryza sativa subsp, japonica (Rice), partial (47%) [TC429520]	ref|XP_006402592,1| hypothetical protein EUTSA_v10005774mg [Eutrema salsugineum] gb|ESQ44045,1| hypothetical protein EUTSA_v10005774mg [Eutrema salsugineum]
A_99_P514912	0.0166121	0.00261303	-2.12899	-1.09017	2.12899		Rep: Monothiol glutaredoxin-S9 - Oryza sativa subsp, japonica (Rice), partial (54%) [TC438297]	gb|EMT17990,1| Monothiol glutaredoxin-S5 [Aegilops tauschii]
A_99_P415112	0.0357542	0.0131876	-2.12754	-1.08918	2.12754		Rep: Calcium-dependent protein kinase - Lilium longiflorum (Trumpet lily), partial (87%) [TC376621]	ref|NP_001137102,1| uncharacterized protein LOC100217278 [Zea mays] gb|ACF83267,1| unknown [Zea mays]
A_99_P321711	0.00880151	0.000123869	-2.12656	-1.08852	2.12656		Rep: Cold induced protein-like - Oryza sativa subsp, japonica (Rice), partial (76%) [TC378785]	gb|EXB53573,1| hypothetical protein L484_009313 [Morus notabilis]
A_99_P096710	0.0283008	0.0081462	-2.12184	-1.08532	2.12184		FGAS062660 Triticum aestivum FGAS: Library 2 Gate 3 Triticum aestivum cDNA, mRNA sequence [CV768269]	gb|ACU00672,1| putative protein [Triticum turgidum subsp, durum]
A_99_P177974	0.0283766	0.00822061	-2.11406	-1.08001	2.11406	LOC100125723	Triticum aestivum pathogen-inducible transcription factor ERF3 mRNA, complete cds [EF570122]	gb|AFK45974,1| unknown [Medicago truncatula]
A_99_P160347	0.0166121	0.0025906	-2.11135	-1.07816	2.11135		Rep: MAP kinase - Triticum aestivum (Wheat), complete [TC368724]	N/A
A_99_P248756	0.0225474	0.00499273	-2.10024	-1.07055	2.10024		TSA: Triticum aestivum cultivar Bobwhite isotig06467,flagleaf mRNA sequence [HP615644]	gb|AAO72595,1| putative protein kinase [Oryza sativa Japonica Group]
A_99_P413662	0.00523595	1.13955e-05	-2.09804	-1.06904	2.09804		Rep: Chromosome chr8 scaffold_88, whole genome shotgun sequence - Vitis vinifera (Grape), partial (57%) [TC385526]	gb|EMT26999,1| Alanine--glyoxylate aminotransferase-2-like protein, mitochondrial [Aegilops tauschii]
A_99_P204406	0.0154903	0.00177704	-2.08881	-1.06268	2.08881		Rep: Expressed protein - Oryza sativa subsp, japonica (Rice), partial (73%) [TC395345]	gb|EMS59721,1| Expansin-A4 [Triticum urartu]
A_99_P237461	0.0226825	0.00514844	-2.0883	-1.06233	2.0883	WCK-1	TSA: Triticum aestivum cultivar Bobwhite isotig15773,flagleaf mRNA sequence [HP624992]	gb|EMT08915,1| hypothetical protein F775_52499 [Aegilops tauschii]
A_99_P423527	0.0154903	0.00208531	-2.08088	-1.0572	2.08088		Rep: Predicted protein - Pichia stipitis (Yeast), partial (4%) [TC383597]	gb|EEE53724,1| hypothetical protein OsJ_00068 [Oryza sativa Japonica Group]
A_99_P055749	0.00880151	0.000118215	-2.06936	-1.04918	2.06936		FGAS056231 Triticum aestivum FGAS: Library 2 Gate 3 Triticum aestivum cDNA, mRNA sequence [CV761843]	emb|CAI93180,1| glycosyltransferase [Triticum aestivum]
A_99_P204656	0.0113247	0.000501556	-2.06914	-1.04903	2.06914			gb|EMS59721,1| Expansin-A4 [Triticum urartu]
A_99_P282056	0.0229841	0.00531429	-1.99827	-0.998753	1.99827			emb|CAI93180,1| glycosyltransferase [Triticum aestivum]
A_99_P302861	0.0240323	0.0057871	-1.99413	-0.995757	1.99413			ref|XP_004515906,1| PREDICTED: uncharacterized protein LOC101490805 [Cicer arietinum]
A_99_P404162	0.0117549	0.000561014	-1.98149	-0.986588	1.98149		Rep: Chromosome chr7 scaffold_20, whole genome shotgun sequence - Vitis vinifera (Grape), partial (64%) [TC405895]	gb|EMS46845,1| hypothetical protein TRIUR3_29896 [Triticum urartu]
A_99_P251936	0.00880151	0.000228134	-1.97802	-0.984059	1.97802		Rep: Os05g0407100 protein - Oryza sativa subsp, japonica (Rice), partial (71%) [TC420249]	dbj|BAK03654,1| predicted protein [Hordeum vulgare subsp, vulgare] dbj|BAK08228,1| predicted protein [Hordeum vulgare subsp, vulgare]
A_99_P373092	0.0185189	0.00328159	-1.97439	-0.98141	1.97439		Rep: Possible transcriptional regulator, TetR family protein - Rhodococcus sp, (strain RHA1), partial (8%) [TC445936]	gb|EPS68083,1| hypothetical protein M569_06690, partial [Genlisea aurea]
A_99_P523067	0.00880151	0.000161495	-1.97351	-0.980761	1.97351		FGAS074145 Triticum aestivum FGAS: Library 2 Gate 3 Triticum aestivum cDNA, mRNA sequence [CV779736]	dbj|BAK03654,1| predicted protein [Hordeum vulgare subsp, vulgare] dbj|BAK08228,1| predicted protein [Hordeum vulgare subsp, vulgare]
A_99_P429542	0.018007	0.00304591	-1.9714	-0.979221	1.9714		FGAS043077 Triticum aestivum FGAS: TaLt6 Triticum aestivum cDNA, mRNA sequence [CK168532]	N/A
A_99_P265136	0.0151869	0.00166535	-1.97081	-0.978789	1.97081			gb|AFW68771,1| hypothetical protein ZEAMMB73_518515 [Zea mays]
A_99_P275561	0.0168988	0.00272301	-1.92202	-0.942625	1.92202		Triticum aestivum cDNA, clone: WT006_L07, cultivar: Chinese Spring [AK333533]	###############################################################################################################################################################################################################################################################
A_99_P636916	0.0291885	0.00861562	-1.76308	-0.818098	1.76308	CCoAMT	FGAS014712 Triticum aestivum FGAS: Library 4 Gate 8 Triticum aestivum cDNA, mRNA sequence [CK162127]	gb|EMT05249,1| Caffeoyl-CoA O-methyltransferase [Aegilops tauschii]
A_99_P169834	0.00903718	0.000283396	-1.46077	-0.546725	1.46077			N/A
A_99_P260106	0.0135537	0.00116387	-1.45803	-0.544021	1.45803			###############################################################################################################################################################################################################################################################
A_99_P388397	0.00653832	5.53267e-05	1.2829	0.359413	1.2829		Rep: Os04g0679800 protein - Oryza sativa subsp, japonica (Rice), partial (77%) [TC389102]	gb|ABD83295,1| Fgenesh protein 81 [Beta vulgaris]
A_99_P198211	0.00880151	0.000149384	1.31915	0.399607	1.31915			N/A
A_99_P537307	0.00523595	9.20729e-06	1.33934	0.421521	1.33934		Rep: Os04g0679800 protein - Oryza sativa subsp, japonica (Rice), partial (97%) [TC390586]	gb|EMT30862,1| RING finger protein 141 [Aegilops tauschii]
A_99_P339161	0.00961342	0.000339748	1.53487	0.618117	1.53487		Rep: Possible OmpA family member precursor - Rhodopseudomonas palustris, partial (6%) [TC413825]	gb|EMS48624,1| hypothetical protein TRIUR3_24759 [Triticum urartu]
A_99_P270391	0.00880151	0.000267243	1.56692	0.64793	1.56692		Rep: Expressed protein - Arabidopsis thaliana (Mouse-ear cress), partial (18%) [TC391735]	ref|XP_003570270,1| PREDICTED: vacuolar amino acid transporter 1-like isoform 1 [Brachypodium distachyon]
A_99_P063617	0.0125509	0.000755383	1.62358	0.699175	1.62358		Rep: Chromosome chr4 scaffold_6, whole genome shotgun sequence - Vitis vinifera (Grape), partial (86%) [TC401225]	ref|XP_006843868,1| hypothetical protein AMTR_s00007p00264970 [Amborella trichopoda] gb|ERN05543,1| hypothetical protein AMTR_s00007p00264970 [Amborella trichopoda]
A_99_P514917	0.0154903	0.00183292	1.64423	0.71741	1.64423		Rep: Chromosome chr5 scaffold_64, whole genome shotgun sequence - Vitis vinifera (Grape), partial (30%) [TC438560]	gb|EMS52195,1| Cysteine-rich receptor-like protein kinase 42 [Triticum urartu]
A_99_P465672	0.0124036	0.000691488	1.696	0.762134	1.696			gb|EMS59060,1| 2-aminoethanethiol dioxygenase [Triticum urartu]
A_99_P526947	0.000394531	1.96382e-07	1.90854	0.932469	1.90854		Triticum aestivum cDNA, clone: WT009_F15, cultivar: Chinese Spring [AK334289]	gb|EMS45159,1| hypothetical protein TRIUR3_27172 [Triticum urartu]
A_99_P432662	0.0117549	0.000561707	1.91258	0.935517	1.91258			gb|EMS51401,1| hypothetical protein TRIUR3_15594 [Triticum urartu]
A_99_P257106	0.0154903	0.00206094	1.92761	0.946812	1.92761		TSA: Triticum aestivum cultivar Bobwhite isotig11576,flagleaf mRNA sequence [HP620785]	ref|XP_004301440,1| PREDICTED: putative ribonuclease H protein At1g65750-like [Fragaria vesca subsp, vesca]
A_99_P257111	0.0166041	0.00246292	1.97505	0.981888	1.97505		TSA: Triticum aestivum cultivar Bobwhite isotig11576,flagleaf mRNA sequence [HP620785]	emb|CAN74665,1| hypothetical protein VITISV_043029 [Vitis vinifera]
A_99_P329976	0.0121447	0.000628694	2.02292	1.01644	2.02292			gb|EMS51401,1| hypothetical protein TRIUR3_15594 [Triticum urartu]
A_99_P115985	0.00880151	0.000266897	2.27358	1.18497	2.27358			gb|ABD32806,1| Cyclin-like F-box; F-box protein interaction domain; Galactose oxidase, central, related [Medicago truncatula]

## Sheet: sh vs ss 2xfold anova benj corr
ProbeName	Corrected p-value	p-value	Fold change([sh] vs [ss])	Log Fold change([sh] vs [ss])	Absolute Fold change([sh] vs [ss])	GeneSymbol	Description
A_99_P434687	0.0125509	0.000743812	-107.269	-6.74509	107.269		Rep: Glutaredoxin-C1 precursor - Oryza sativa subsp, japonica (Rice), partial (97%) [TC392299]	gb|EMT22949,1| Glutaredoxin-C1 [Aegilops tauschii]
A_99_P549027	0.0240011	0.00573706	-100.646	-6.65315	100.646		Rep: Basic helix-loop-helix protein - Hordeum vulgare (Barley), partial (87%) [TC451913]	ref|XP_002322205,1| hypothetical protein POPTR_0015s09680g [Populus trichocarpa] gb|EEF06332,1| hypothetical protein POPTR_0015s09680g [Populus trichocarpa]
A_99_P115130	0.00523595	1.4966e-05	-69.853	-6.12625	69.853		CJ659786 Y,Ogihara unpublished cDNA library Wh_HGCPCDAM Triticum aestivum cDNA clone whhg20e20 5', mRNA sequence [CJ659786]	gb|EMT04849,1| hypothetical protein F775_29691 [Aegilops tauschii]
A_99_P153527	0.0131955	0.00105091	-41.4134	-5.37203	41.4134		CJ907213 Y, Ogihara unpublished cDNA library, whthkles Triticum aestivum cDNA clone whthkles6f15 5', mRNA sequence [CJ907213]	gb|EMS62879,1| Glutaredoxin-C1 [Triticum urartu]
A_99_P299371	0.0318955	0.0106371	-41.0167	-5.35814	41.0167			gb|EMS58244,1| hypothetical protein TRIUR3_29839 [Triticum urartu]
A_99_P299366	0.0283913	0.00823898	-40.1021	-5.32561	40.1021		AZO1,003M24F010109 AZO1 Triticum aestivum cDNA clone AZO1003M24, mRNA sequence [CD861795]	gb|EMS58244,1| hypothetical protein TRIUR3_29839 [Triticum urartu]
A_99_P050234	0.0282732	0.00808427	-37.4358	-5.22635	37.4358		Rep: Serine/threonine protein kinase precursor - Nocardioides sp, (strain BAA-499 / JS614), partial (6%) [TC434364]	gb|EMT05691,1| hypothetical protein F775_29758 [Aegilops tauschii]
A_99_P024619	0.0319024	0.010765	-33.0351	-5.04593	33.0351		AZO1,003M24F010109 AZO1 Triticum aestivum cDNA clone AZO1003M24, mRNA sequence [CD861795]	gb|EMS58244,1| hypothetical protein TRIUR3_29839 [Triticum urartu]
A_99_P446457	0.0137036	0.0012278	-30.0698	-4.91025	30.0698		Rep: Glutaredoxin-C1 precursor - Oryza sativa subsp, japonica (Rice), partial (97%) [TC401195]	gb|EMS60895,1| hypothetical protein TRIUR3_15807 [Triticum urartu]
A_99_P120834	0.017094	0.00278235	-26.5167	-4.72883	26.5167		TSA: Triticum aestivum cultivar Bobwhite contig25883,flagleaf mRNA sequence [HP609225]	ref|XP_002528210,1| Auxin-induced protein 5NG4, putative [Ricinus communis] gb|EEF34167,1| Auxin-induced protein 5NG4, putative [Ricinus communis]
A_99_P455762	0.0151869	0.00164591	-23.7167	-4.56783	23.7167		Rep: Glutaredoxin-C1 precursor - Oryza sativa subsp, japonica (Rice), partial (94%) [TC407602]	gb|EMT22951,1| Glutaredoxin-C1 [Aegilops tauschii]
A_99_P268781	0.0166121	0.00255799	-19.8349	-4.30997	19.8349		Triticum aestivum cDNA, clone: WT013_L04, cultivar: Chinese Spring [AK335754]	dbj|BAK06072,1| predicted protein [Hordeum vulgare subsp, vulgare]
A_99_P072530	0.0278647	0.00782266	-19.6858	-4.29908	19.6858		Rep: Glycine-rich protein GRP18 - Arabidopsis thaliana (Mouse-ear cress), partial (7%) [TC408658]	N/A
A_99_P179790	0.00523595	2.29369e-05	-17.0964	-4.09562	17.0964		wle1n,pk0062,b12 wle1n Triticum aestivum cDNA clone wle1n,pk0062,b12 5' end, mRNA sequence [CA632242]	gb|ACH69772,1| Adf2 [Hordeum vulgare subsp, vulgare] gb|ACH70383,1| actin depolymerization factor-like protein [Hordeum vulgare subsp, vulgare]
A_99_P338386	0.0117312	0.000543058	-15.6287	-3.96613	15.6287			N/A
A_99_P408672	0.020185	0.00381913	-13.6796	-3.77396	13.6796		Rep: Adenine phosphoribosyltransferase - Triticum aestivum (Wheat), partial (98%) [TC370738]	ref|XP_004138108,1| PREDICTED: 1-deoxy-D-xylulose 5-phosphate reductoisomerase, chloroplastic-like [Cucumis sativus] ref|XP_004155015,1| PREDICTED: 1-deoxy-D-xylulose 5-phosphate reductoisomerase, chloroplastic-like [Cucumis sativus]
A_99_P388462	0.0217166	0.00451133	-13.2328	-3.72604	13.2328		Rep: Glycosyl transferase family 8 protein, expressed - Oryza sativa subsp, japonica (Rice), partial (34%) [TC432069]	ref|XP_003561312,1| PREDICTED: probable galacturonosyltransferase-like 2-like [Brachypodium distachyon]
A_99_P071975	0.0159325	0.00219677	-12.2644	-3.6164	12.2644		Triticum aestivum cDNA, clone: SET3_C08, cultivar: Chinese Spring [AK336065]	gb|EMS68526,1| MATE efflux family protein 9 [Triticum urartu]
A_99_P136450	0.0227084	0.00516804	-10.6721	-3.41577	10.6721			gb|EMS63193,1| L-Ala-D/L-Glu epimerase [Triticum urartu]
A_99_P095910	0.0441708	0.0185346	-9.69448	-3.27716	9.69448		wlm96,pk029,o18 wlm96 Triticum aestivum cDNA clone wlm96,pk029,o18 5' end, mRNA sequence [CA685366]	gb|EMT23431,1| hypothetical protein F775_26545 [Aegilops tauschii]
A_99_P522547	0.0220578	0.00466628	-9.00948	-3.17144	9.00948			gb|EMT04676,1| hypothetical protein F775_43999 [Aegilops tauschii]
A_99_P230736	0.0273414	0.00756685	-8.97525	-3.16595	8.97525			gb|EMT04676,1| hypothetical protein F775_43999 [Aegilops tauschii]
A_99_P499957	0.0399452	0.0156996	-8.77697	-3.13372	8.77697			N/A
A_99_P182972	0.0127836	0.000974186	-8.42968	-3.07548	8.42968		FGAS069315 Triticum aestivum FGAS: Library 2 Gate 3 Triticum aestivum cDNA, mRNA sequence [CV774915]	emb|CAI93180,1| glycosyltransferase [Triticum aestivum]
A_99_P362421	0.00584431	3.19997e-05	-7.96709	-2.99405	7.96709		Rep: Chromosome 13 SCAF14566, whole genome shotgun sequence - Tetraodon nigroviridis (Green puffer), partial (6%) [TC436210]	dbj|BAJ94321,1| predicted protein [Hordeum vulgare subsp, vulgare]
A_99_P229376	0.0284013	0.00830275	-7.95095	-2.99113	7.95095		Rep: Pathogenesis-related 1a - Triticum monococcum (Einkorn wheat) (Small spelt), partial (80%) [TC384382]	emb|CAI93180,1| glycosyltransferase [Triticum aestivum]
A_99_P006041	0.0125509	0.000755963	-7.86467	-2.97539	7.86467			dbj|BAJ94605,1| predicted protein [Hordeum vulgare subsp, vulgare]
A_99_P464542	0.0127836	0.000885951	-7.74678	-2.9536	7.74678			dbj|BAJ95182,1| predicted protein [Hordeum vulgare subsp, vulgare] dbj|BAJ97475,1| predicted protein [Hordeum vulgare subsp, vulgare]
A_99_P321711	0.00880151	0.000123869	-7.55834	-2.91807	7.55834		Rep: Cold induced protein-like - Oryza sativa subsp, japonica (Rice), partial (76%) [TC378785]	gb|EXB53573,1| hypothetical protein L484_009313 [Morus notabilis]
A_99_P443962	0.0154903	0.0019945	-7.46843	-2.9008	7.46843		Rep: Os04g0301500 protein - Oryza sativa subsp, japonica (Rice), partial (34%) [TC399372]	gb|EXB55187,1| hypothetical protein L484_018114 [Morus notabilis]
A_99_P057636	0.0357647	0.0132271	-7.19187	-2.84637	7.19187		FGAS020534 Triticum aestivum FGAS: Library 5 GATE 7 Triticum aestivum cDNA, mRNA sequence [CK208812]	gb|EMS51602,1| hypothetical protein TRIUR3_04160 [Triticum urartu]
A_99_P084060	0.0151869	0.00168575	-6.89959	-2.78651	6.89959		FGAS067000 Triticum aestivum FGAS: Library 2 Gate 3 Triticum aestivum cDNA, mRNA sequence [CV772605]	gb|EMT29993,1| hypothetical protein F775_30159 [Aegilops tauschii]
A_99_P261221	0.0154903	0.00193254	-6.80504	-2.7666	6.80504		Rep: Os04g0301500 protein - Oryza sativa subsp, japonica (Rice), partial (24%) [TC403274]	N/A
A_99_P487912	0.0154412	0.00173704	-6.49995	-2.70043	6.49995		Rep: Glutaredoxin-C1 precursor - Oryza sativa subsp, japonica (Rice), partial (94%) [TC426163]	dbj|BAJ89491,1| predicted protein [Hordeum vulgare subsp, vulgare]
A_99_P476032	0.0201107	0.00375386	-6.26793	-2.64799	6.26793		Rep: O-antigen polymerase - Psychroflexus torquis ATCC 700755, partial (5%) [TC419972]	ref|XP_003589621,1| LRR receptor-like serine/threonine-protein kinase ERL2 [Medicago truncatula] gb|AES59872,1| LRR receptor-like serine/threonine-protein kinase ERL2 [Medicago truncatula]
A_99_P308196	0.0111988	0.000475787	-6.0515	-2.59729	6.0515			gb|EMS46246,1| hypothetical protein TRIUR3_28783 [Triticum urartu]
A_99_P503727	0.0162527	0.00227807	-6.01498	-2.58856	6.01498			ref|XP_001759849,1| predicted protein [Physcomitrella patens] gb|EDQ75353,1| predicted protein [Physcomitrella patens]
A_99_P545967	0.0111988	0.000443234	-5.87132	-2.55368	5.87132		Rep: Chromosome chr2 scaffold_105, whole genome shotgun sequence - Vitis vinifera (Grape), partial (4%) [TC450793]	N/A
A_99_P424997	0.00653832	4.43049e-05	-5.8514	-2.54878	5.8514		Rep: 10A19I,8 - Oryza sativa subsp, japonica (Rice), partial (30%) [TC384743]	ref|XP_003054819,1| prasinophyte-specific protein [Micromonas pusilla CCMP1545] gb|EEH60071,1| prasinophyte-specific protein [Micromonas pusilla CCMP1545]
A_99_P330041	0.0323881	0.0110507	-5.77371	-2.5295	5.77371			gb|AAQ90182,1| ntp101 [Nicotiana tabacum] gb|AAQ90184,1| ntp302 [Nicotiana tabacum]
A_99_P258411	0.0117343	0.000549044	-5.69232	-2.50902	5.69232		Rep: Cold induced protein-like - Oryza sativa subsp, japonica (Rice), partial (63%) [TC378326]	gb|EMS48744,1| hypothetical protein TRIUR3_08076 [Triticum urartu]
A_99_P098710	0.0225474	0.00497887	-5.59008	-2.48287	5.59008			gb|EMS60331,1| hypothetical protein TRIUR3_15438 [Triticum urartu]
A_99_P212271	0.0126712	0.000807321	-5.55002	-2.47249	5.55002		Rep: Os03g0388900 protein - Oryza sativa subsp, japonica (Rice), partial (23%) [TC378098]	gb|EMS54793,1| Metacaspase-1 [Triticum urartu]
A_99_P212266	0.00952029	0.000325917	-5.46764	-2.45092	5.46764		Rep: Os03g0388900 protein - Oryza sativa subsp, japonica (Rice), partial (18%) [TC428788]	gb|EMT12600,1| hypothetical protein F775_43750 [Aegilops tauschii]
A_99_P277346	0.0135537	0.00114584	-5.42295	-2.43908	5.42295			gb|EMT09801,1| Two-component response regulator ARR8 [Aegilops tauschii]
A_99_P435502	0.0168988	0.00270948	-5.32181	-2.41192	5.32181		Rep: Os02g0670500 protein - Oryza sativa subsp, japonica (Rice), partial (26%) [TC392949]	ref|XP_002457819,1| hypothetical protein SORBIDRAFT_03g014360 [Sorghum bicolor] gb|EES02939,1| hypothetical protein SORBIDRAFT_03g014360 [Sorghum bicolor]
A_99_P561407	0.0151091	0.00159671	-5.28596	-2.40216	5.28596		Rep: Plasma membrane ATPase - Triticum aestivum (Wheat), partial (5%) [TC456575]	dbj|BAJ89265,1| predicted protein [Hordeum vulgare subsp, vulgare]
A_99_P473887	0.0229841	0.00532475	-5.23436	-2.38801	5.23436		CJ699779 Y,Ogihara unpublished cDNA library Wh_SHDr Triticum aestivum cDNA clone whsd18f20 5', mRNA sequence [CJ699779]	gb|EMT05087,1| Chaperone protein dnaJ 8, chloroplastic [Aegilops tauschii]
A_99_P283476	0.0485632	0.0217797	-5.2323	-2.38745	5.2323			ref|NP_001151494,1| nucleoside transporter [Zea mays] gb|ACG43078,1| nucleoside transporter [Zea mays]
A_99_P082600	0.0252088	0.00642839	-5.20395	-2.37961	5.20395		FGAS067960 Triticum aestivum FGAS: Library 2 Gate 3 Triticum aestivum cDNA, mRNA sequence [CV773563]	dbj|BAJ88332,1| predicted protein [Hordeum vulgare subsp, vulgare]
A_99_P149637	0.0403589	0.0159708	-5.1737	-2.3712	5.1737		CJ804901 Y, Ogihara unpublished cDNA library, whsct Triticum aestivum cDNA clone whsct32g17 5', mRNA sequence [CJ804901]	gb|EMT09852,1| hypothetical protein F775_52440 [Aegilops tauschii]
A_99_P396582	0.0151968	0.00170198	-5.15651	-2.36639	5.15651		Triticum aestivum cDNA, clone: SET3_D05, cultivar: Chinese Spring [AK336086]	ref|XP_002955411,1| DEAD-box RNA helicase, ATP-dependent [Volvox carteri f, nagariensis] gb|EFJ43482,1| DEAD-box RNA helicase, ATP-dependent [Volvox carteri f, nagariensis]
A_99_P495547	0.0154903	0.00205591	-4.97447	-2.31454	4.97447		Rep: Chromosome chr2 scaffold_105, whole genome shotgun sequence - Vitis vinifera (Grape), partial (9%) [TC429715]	ref|XP_003612653,1| ATP-dependent DNA helicase PIF1 [Medicago truncatula] gb|AES95611,1| ATP-dependent DNA helicase PIF1 [Medicago truncatula]
A_99_P401357	0.0181639	0.00311263	-4.96465	-2.31169	4.96465			gb|AAC62127,1| hypothetical protein [Arabidopsis thaliana]
A_99_P496467	0.0273036	0.00753695	-4.95114	-2.30776	4.95114		Rep: Chromosome chr2 scaffold_11, whole genome shotgun sequence - Vitis vinifera (Grape), partial (27%) [TC430154]	ref|XP_004295757,1| PREDICTED: pentatricopeptide repeat-containing protein At1g12300, mitochondrial-like [Fragaria vesca subsp, vesca]
A_99_P554347	0.0111988	0.000477564	-4.91553	-2.29735	4.91553		Rep: Os03g0388900 protein - Oryza sativa subsp, japonica (Rice), partial (39%) [TC453943]	gb|EMS50676,1| Metacaspase-1 [Triticum urartu]
A_99_P555597	0.0189109	0.00341695	-4.91426	-2.29697	4.91426			ref|XP_006448444,1| hypothetical protein CICLE_v10017573mg [Citrus clementina] gb|ESR61684,1| hypothetical protein CICLE_v10017573mg [Citrus clementina]
A_99_P277326	0.0164557	0.00237978	-4.87948	-2.28673	4.87948			gb|EMS50922,1| Two-component response regulator ARR8 [Triticum urartu]
A_99_P208061	0.0333794	0.0115806	-4.76304	-2.25188	4.76304			gb|EMT17882,1| Germin-like protein 8-12 [Aegilops tauschii]
A_99_P214486	0.00880151	0.000104897	-4.74606	-2.24673	4.74606		Rep: Auxin response factor 17 - Oryza sativa subsp, japonica (Rice), partial (34%) [TC427997]	gb|EMS51666,1| Auxin response factor 17 [Triticum urartu]
A_99_P122310	0.0343522	0.0123969	-4.69754	-2.23191	4.69754		CJ665027 Y,Ogihara unpublished cDNA library Wh_KMP Triticum aestivum cDNA clone whkp2b05 5', mRNA sequence [CJ665027]	ref|XP_001765949,1| predicted protein [Physcomitrella patens] gb|EDQ69270,1| predicted protein [Physcomitrella patens]
A_99_P526612	0.0369728	0.0140235	-4.66477	-2.22181	4.66477		CJ665027 Y,Ogihara unpublished cDNA library Wh_KMP Triticum aestivum cDNA clone whkp2b05 5', mRNA sequence [CJ665027]	ref|XP_001765949,1| predicted protein [Physcomitrella patens] gb|EDQ69270,1| predicted protein [Physcomitrella patens]
A_99_P291586	0.0154903	0.00179271	-4.57745	-2.19454	4.57745		Rep: Vegetative cell wall protein - Chlamydomonas incerta, partial (4%) [TC379202]	ref|XP_007141766,1| hypothetical protein PHAVU_008G224000g [Phaseolus vulgaris] gb|ESW13760,1| hypothetical protein PHAVU_008G224000g [Phaseolus vulgaris]
A_99_P518132	0.029678	0.00908511	-4.56621	-2.191	4.56621			gb|EMT17882,1| Germin-like protein 8-12 [Aegilops tauschii]
A_99_P345371	0.00880151	0.000256799	-4.56037	-2.18915	4.56037			ref|XP_006418647,1| hypothetical protein EUTSA_v10002914mg [Eutrema salsugineum] gb|ESQ37083,1| hypothetical protein EUTSA_v10002914mg [Eutrema salsugineum]
A_99_P576337	0.0181639	0.00311923	-4.52932	-2.17929	4.52932		Rep: ZIM motif family protein, expressed - Oryza sativa subsp, japonica (Rice), partial (43%) [TC461889]	gb|AHL27912,1| chalcone synthase, partial [Triticum aestivum]
A_99_P166022	0.0127836	0.000885654	-4.45212	-2.15449	4.45212		TSA: Triticum aestivum cultivar Bobwhite isotig02229,flagleaf mRNA sequence [HP611372]	gb|EMT22524,1| Light-inducible protein CPRF2 [Aegilops tauschii]
A_99_P055749	0.00880151	0.000118215	-4.23411	-2.08206	4.23411		FGAS056231 Triticum aestivum FGAS: Library 2 Gate 3 Triticum aestivum cDNA, mRNA sequence [CV761843]	emb|CAI93180,1| glycosyltransferase [Triticum aestivum]
A_99_P483022	0.00952029	0.000331717	-4.22068	-2.07748	4.22068		Rep: FRO2 homolog - Arabidopsis thaliana (Mouse-ear cress), partial (18%) [TC423920]	gb|EMS45573,1| Superoxide-generating NADPH oxidase heavy chain subunit B [Triticum urartu]
A_99_P290116	0.0166258	0.00263166	-4.18032	-2.06361	4.18032	TPS	Triticum aestivum cDNA, clone: WT007_G01, cultivar: Chinese Spring [AK331389]	ref|XP_006349135,1| PREDICTED: probable fatty acyl-CoA reductase 5-like [Solanum tuberosum]
A_99_P525412	0.00880151	0.000266384	-4.17537	-2.0619	4.17537			N/A
A_99_P250731	0.0154903	0.00185791	-4.16521	-2.05839	4.16521			gb|AAQ56222,1| antiviral/ribosome-inactivating protein [Amaranthus tricolor]
A_99_P351571	0.033391	0.0116345	-4.14396	-2.05101	4.14396			dbj|BAJ87411,1| predicted protein [Hordeum vulgare subsp, vulgare]
A_99_P310886	0.0248395	0.00618226	-4.12711	-2.04513	4.12711		TSA: Triticum aestivum cultivar Bobwhite isotig00246,flagleaf mRNA sequence [HP609283]	N/A
A_99_P539482	0.0111988	0.000440909	-4.11853	-2.04213	4.11853			ref|XP_003544728,2| PREDICTED: uncharacterized protein LOC100795386 [Glycine max]
A_99_P261206	0.0151091	0.00157191	-4.06123	-2.02191	4.06123		Rep: WRKY transcription factor - Hordeum vulgare (Barley), partial (14%) [TC438102]	dbj|BAK08337,1| predicted protein [Hordeum vulgare subsp, vulgare]
A_99_P401992	0.0273833	0.00763298	-4.02813	-2.01011	4.02813			ref|XP_002309905,1| hypothetical protein POPTR_0007s04000g [Populus trichocarpa] gb|EEE90355,1| hypothetical protein POPTR_0007s04000g [Populus trichocarpa]
A_99_P204836	0.0483067	0.0213935	-3.99215	-1.99717	3.99215		Rep: Bowman-Birk serine proteinase inhibitor - Musa acuminata (Banana), partial (44%) [TC400821]	dbj|BAJ91965,1| predicted protein [Hordeum vulgare subsp, vulgare]
A_99_P417597	0.00880151	0.000182182	-3.96525	-1.98741	3.96525		Rep: Os05g0524100 protein - Oryza sativa subsp, japonica (Rice), partial (25%) [TC378630]	ref|XP_006468374,1| PREDICTED: protein CHUP1, chloroplastic-like [Citrus sinensis]
A_99_P331236	0.020185	0.00383482	-3.89488	-1.96158	3.89488		Rep: Os01g0820300 protein - Oryza sativa subsp, japonica (Rice), partial (3%) [TC429947]	ref|XP_006651526,1| PREDICTED: uncharacterized protein LOC102703670 [Oryza brachyantha]
A_99_P484377	0.0154903	0.00202463	-3.88693	-1.95863	3.88693			ref|YP_358637,1| hypothetical protein PhapfoPp091 [Phalaenopsis aphrodite subsp, formosana] gb|AAW82573,1| hypothetical protein [Phalaenopsis aphrodite subsp, formosana]
A_99_P274866	0.0205798	0.00405655	-3.81071	-1.93006	3.81071		Triticum aestivum cDNA, clone: SET5_A09, cultivar: Chinese Spring [AK330672]	dbj|BAJ95004,1| predicted protein [Hordeum vulgare subsp, vulgare]
A_99_P107690	0.0151091	0.00154551	-3.78951	-1.92201	3.78951		CJ875123 Y, Ogihara unpublished cDNA library, whthls Triticum aestivum cDNA clone whthls18c07 5', mRNA sequence [CJ875123]	gb|EMT23891,1| Myb family transcription factor APL [Aegilops tauschii]
A_99_P275366	0.0373939	0.0143321	-3.74694	-1.90571	3.74694			emb|CAI93180,1| glycosyltransferase [Triticum aestivum]
A_99_P052251	0.00903718	0.000279033	-3.72419	-1.89693	3.72419			ref|XP_002264727,1| PREDICTED: UDP-glucose flavonoid 3-O-glucosyltransferase 6 [Vitis vinifera] emb|CBI24155,3| unnamed protein product [Vitis vinifera]
A_99_P429777	0.0164557	0.0023461	-3.70751	-1.89045	3.70751		Triticum aestivum cDNA, clone: SET5_A09, cultivar: Chinese Spring [AK330672]	ref|XP_003557826,1| PREDICTED: villin-2-like [Brachypodium distachyon]
A_99_P334246	0.0459041	0.0196047	-3.70037	-1.88767	3.70037		Rep: HSF-type DNA-binding domain containing protein, expressed - Oryza sativa subsp, japonica (Rice), partial (67%) [TC432537]	ref|XP_004492204,1| PREDICTED: UPF0361 protein C3orf37 homolog [Cicer arietinum]
A_99_P252211	0.0483325	0.0215021	-3.68174	-1.88039	3.68174		FGAS084915 Triticum aestivum FGAS: Library 6 CAP GATE 1 Triticum aestivum cDNA, mRNA sequence [DR739698]	N/A
A_99_P281671	0.0437334	0.0182204	-3.65084	-1.86823	3.65084		Rep: Boron transporter 1 - Arabidopsis thaliana (Mouse-ear cress), partial (91%) [TC381799]	gb|EMT30931,1| Putative boron transporter 2 [Aegilops tauschii]
A_99_P262736	0.0319024	0.0107665	-3.60707	-1.85083	3.60707		Rep: Calcium-dependent calmodulin-independent protein kinase isoform 2 - Cicer arietinum (Chickpea) (Garbanzo), partial (62%) [TC411941]	gb|EMS57373,1| Calcium-dependent protein kinase 7 [Triticum urartu]
A_99_P497082	0.018007	0.00305644	-3.59039	-1.84414	3.59039		Rep: 6-phosphogluconate dehydrogenase, decarboxylating - Oryza sativa subsp, indica (Rice), partial (25%) [TC444857]	ref|XP_007012206,1| Tetratricopeptide repeat-like superfamily protein isoform 3, partial [Theobroma cacao] ref|XP_007012209,1| Tetratricopeptide repeat-like superfamily protein isoform 3, partial [Theobroma cacao] ref|XP_007012210,1| Tetratricopeptide repeat-like superfamily protein isoform 3, partial [Theobroma cacao] gb|EOY29825,1| Tetratricopeptide repeat-like superfamily protein isoform 3, pa…
A_99_P417382	0.0262118	0.0069272	-3.56953	-1.83573	3.56953		Rep: Os11g0274100 protein - Oryza sativa subsp, japonica (Rice), partial (21%) [TC378449]	dbj|BAJ88667,1| predicted protein [Hordeum vulgare subsp, vulgare]
A_99_P281681	0.0367721	0.0139108	-3.56678	-1.83462	3.56678			ref|XP_004170450,1| PREDICTED: LOW QUALITY PROTEIN: ATPase family AAA domain-containing protein At1g05910-like [Cucumis sativus]
A_99_P462052	0.00880151	0.00022271	-3.51191	-1.81226	3.51191		Rep: Seed specific protein, 5'-partial-like protein - Oryza sativa subsp, japonica (Rice), partial (11%) [TC411837]	gb|EMS63953,1| hypothetical protein TRIUR3_28321 [Triticum urartu]
A_99_P433567	0.0387382	0.0150402	-3.49313	-1.80452	3.49313		Triticum aestivum cDNA, clone: WT011_B15, cultivar: Chinese Spring [AK334797]	gb|EMS49294,1| Cysteine-rich receptor-like protein kinase 41 [Triticum urartu]
A_99_P254016	0.0166121	0.00255951	-3.46178	-1.79151	3.46178		Rep: O-methyltransferase - Oryza sativa subsp, japonica (Rice), partial (24%) [TC397822]	ref|XP_006853110,1| hypothetical protein AMTR_s00038p00132760 [Amborella trichopoda] gb|ERN14577,1| hypothetical protein AMTR_s00038p00132760 [Amborella trichopoda]
A_99_P445232	0.0221812	0.00481385	-3.45393	-1.78824	3.45393		FGAS062528 Triticum aestivum FGAS: Library 2 Gate 3 Triticum aestivum cDNA, mRNA sequence [CV768137]	ref|XP_003602454,1| N-acetyltransferase, putative [Medicago truncatula] gb|AES72705,1| N-acetyltransferase, putative [Medicago truncatula]
A_99_P254006	0.0331309	0.0114544	-3.43004	-1.77822	3.43004		Rep: O-methyltransferase family protein - Oryza sativa subsp, japonica (Rice), partial (90%) [TC428269]	ref|XP_004302104,1| PREDICTED: uncharacterized protein LOC101296301 [Fragaria vesca subsp, vesca]
A_99_P489907	0.0248234	0.00609155	-3.42684	-1.77688	3.42684	LOC100192166	Triticum aestivum cDNA, clone: WT002_H05, cultivar: Chinese Spring [AK331823]	gb|EMS56089,1| hypothetical protein TRIUR3_27334 [Triticum urartu]
A_99_P261211	0.0164557	0.00238564	-3.41383	-1.77139	3.41383			dbj|BAJ98111,1| predicted protein [Hordeum vulgare subsp, vulgare]
A_99_P353296	0.0154903	0.00201474	-3.4051	-1.7677	3.4051		Rep: Expressed protein - Oryza sativa subsp, japonica (Rice), partial (30%) [TC447394]	gb|EMS47684,1| hypothetical protein TRIUR3_26835 [Triticum urartu]
A_99_P469812	0.0220704	0.00471697	-3.32044	-1.73137	3.32044		Rep: ZIM motif family protein, expressed - Oryza sativa subsp, japonica (Rice), partial (56%) [TC416451]	dbj|BAK05015,1| predicted protein [Hordeum vulgare subsp, vulgare]
A_99_P261191	0.0202093	0.00386404	-3.31876	-1.73065	3.31876			gb|ABA97480,1| hypothetical protein LOC_Os12g18750 [Oryza sativa Japonica Group]
A_99_P470437	0.0284013	0.00830068	-3.31113	-1.72732	3.31113		TSA: Triticum aestivum cultivar Bobwhite isotig15096,flagleaf mRNA sequence [HP624311]	gb|EMT28254,1| hypothetical protein F775_06906 [Aegilops tauschii]
A_99_P426057	0.020185	0.00380442	-3.26357	-1.70645	3.26357		Rep: WRKY transcription factor - Triticum aestivum (Wheat), partial (45%) [TC385517]	dbj|BAJ98111,1| predicted protein [Hordeum vulgare subsp, vulgare]
A_99_P424367	0.0154903	0.00206546	-3.2496	-1.70026	3.2496			gb|EMS67284,1| Spastin [Triticum urartu]
A_99_P435062	0.0156767	0.00213028	-3.24662	-1.69894	3.24662		Rep: Auxin response factor 17 - Oryza sativa subsp, indica (Rice), partial (12%) [TC392558]	gb|EMT11111,1| Auxin response factor 17 [Aegilops tauschii]
A_99_P248851	0.0282027	0.00804389	-3.23747	-1.69487	3.23747			gb|EMT07547,1| Hydroxyisourate hydrolase [Aegilops tauschii]
A_99_P248841	0.0232187	0.00545692	-3.23287	-1.69281	3.23287			gb|EMT07547,1| Hydroxyisourate hydrolase [Aegilops tauschii]
A_99_P251706	0.0311922	0.0102318	-3.19298	-1.6749	3.19298		Rep: Germin-like protein 4 - Triticum monococcum (Einkorn wheat) (Small spelt), partial (87%) [TC375903]	gb|EMT00456,1| Germin-like protein 8-5 [Aegilops tauschii]
A_99_P208341	0.0309593	0.00994417	-3.16862	-1.66385	3.16862			gb|EMT17882,1| Germin-like protein 8-12 [Aegilops tauschii]
A_99_P431412	0.0124036	0.000689962	-3.15	-1.65535	3.15		Rep: Response regulator 5 - Zea mays (Maize), partial (11%) [TC389645]	gb|AFW70139,1| hypothetical protein ZEAMMB73_003058 [Zea mays]
A_99_P485917	0.00880151	0.000185981	-3.13296	-1.64753	3.13296		Rep: Submergence induced protein SI397 - Zea mays (Maize), partial (47%) [TC425181]	dbj|BAJ85001,1| predicted protein [Hordeum vulgare subsp, vulgare]
A_99_P293486	0.0126712	0.000804631	-3.11685	-1.64009	3.11685		Rep: Chromosome chr7 scaffold_20, whole genome shotgun sequence - Vitis vinifera (Grape), partial (92%) [TC435693]	ref|XP_004985291,1| PREDICTED: uncharacterized protein LOC101775138 isoform X1 [Setaria italica]
A_99_P460217	0.0151091	0.00155456	-3.11665	-1.64	3.11665			gb|EMT26441,1| Spastin [Aegilops tauschii]
A_99_P155317	0.0273833	0.00762482	-3.1152	-1.63932	3.1152		Rep: 6-phosphogluconate dehydrogenase, decarboxylating - Oryza sativa subsp, japonica (Rice), partial (55%) [TC379244]	gb|EMS56831,1| 6-phosphogluconate dehydrogenase, decarboxylating [Triticum urartu]
A_99_P141558	0.0440683	0.0184038	-3.10877	-1.63634	3.10877			gb|EMS60706,1| Dynamin-2B [Triticum urartu]
A_99_P146742	0.0316448	0.0105085	-3.09854	-1.63159	3.09854		Rep: Chromosome chr3 scaffold_8, whole genome shotgun sequence - Vitis vinifera (Grape), partial (15%) [TC414994]	dbj|BAJ93070,1| predicted protein [Hordeum vulgare subsp, vulgare]
A_99_P254001	0.0167446	0.0026588	-3.08729	-1.62634	3.08729		Rep: O-methyltransferase family protein, expressed - Oryza sativa subsp, japonica (Rice), partial (96%) [TC395887]	ref|XP_002513617,1| conserved hypothetical protein [Ricinus communis] gb|EEF49020,1| conserved hypothetical protein [Ricinus communis]
A_99_P518542	0.0162527	0.00227631	-3.06463	-1.61571	3.06463		Rep: Aquaporin NIP1-3 - Oryza sativa subsp, japonica (Rice), partial (88%) [TC439932]	ref|XP_006355956,1| PREDICTED: probable peptide transporter At1g52190-like [Solanum tuberosum]
A_99_P315381	0.0262195	0.00696924	-3.04822	-1.60797	3.04822		Rep: Chromosome chr2 scaffold_11, whole genome shotgun sequence - Vitis vinifera (Grape), partial (58%) [TC458805]	dbj|BAJ93880,1| predicted protein [Hordeum vulgare subsp, vulgare]
A_99_P477707	0.0358025	0.0132589	-3.04709	-1.60743	3.04709		Triticum aestivum cDNA, clone: SET2_L08, cultivar: Chinese Spring [AK335888]	N/A
A_99_P385232	0.0357029	0.0131509	-3.04094	-1.60452	3.04094		Rep: Cytochrome P450 - Lolium rigidum (Annual ryegrass), partial (40%) [TC435691]	gb|EMS66720,1| Cytochrome P450 71A1 [Triticum urartu]
A_99_P318916	0.0279632	0.00793382	-3.03092	-1.59976	3.03092		Rep: UDP-glucuronic acid 4-epimerase - Zea mays (Maize), partial (21%) [TC452779]	ref|XP_006595365,1| PREDICTED: uncharacterized protein LOC102664778 [Glycine max]
A_99_P254996	0.0457965	0.0195131	-3.02971	-1.59918	3.02971			dbj|BAJ95137,1| predicted protein [Hordeum vulgare subsp, vulgare]
A_99_P195753	0.0248395	0.00618873	-3.02934	-1.599	3.02934	ST3,6	Triticum aestivum cDNA, clone: SET2_J23, cultivar: Chinese Spring [AK335668]	ref|XP_006858959,1| hypothetical protein AMTR_s00068p00110730 [Amborella trichopoda] gb|ERN20426,1| hypothetical protein AMTR_s00068p00110730 [Amborella trichopoda]
A_99_P208396	0.0202093	0.00390304	-3.02896	-1.59882	3.02896			ref|XP_002986512,1| glycosyltransferase-like protein [Selaginella moellendorffii] gb|EFJ12369,1| glycosyltransferase-like protein [Selaginella moellendorffii]
A_99_P287896	0.0166121	0.00256309	-3.01105	-1.59027	3.01105			ref|XP_004971987,1| PREDICTED: uncharacterized protein LOC101762484 [Setaria italica]
A_99_P521847	0.00880151	0.000226508	-3.0006	-1.58525	3.0006		Triticum aestivum cDNA, clone: WT008_N16, cultivar: Chinese Spring [AK334034]	gb|EMT27039,1| putative Non-specific lipid-transfer protein [Aegilops tauschii]
A_99_P259911	0.0126712	0.000806183	-2.9976	-1.58381	2.9976		Triticum aestivum cDNA, clone: WT011_P12, cultivar: Chinese Spring [AK335062]	ref|XP_003631008,1| THO complex subunit [Medicago truncatula] gb|AET05484,1| THO complex subunit [Medicago truncatula]
A_99_P535067	0.0135537	0.00113419	-2.99247	-1.58134	2.99247		Rep: Amino acid permease - Plantago major (Common plantain), partial (24%) [TC446561]	gb|EEE53056,1| hypothetical protein OsJ_35791 [Oryza sativa Japonica Group]
A_99_P308101	0.0278671	0.00784905	-2.96945	-1.5702	2.96945		Rep: Os06g0326400 protein - Oryza sativa subsp, japonica (Rice), partial (30%) [TC405788]	gb|EMT11806,1| Pyrophosphate--fructose 6-phosphate 1-phosphotransferase subunit alpha [Aegilops tauschii]
A_99_P265136	0.0151869	0.00166535	-2.96686	-1.56893	2.96686			gb|AFW68771,1| hypothetical protein ZEAMMB73_518515 [Zea mays]
A_99_P259901	0.0151091	0.00160076	-2.96244	-1.56679	2.96244		Rep: F12M16,12 - Arabidopsis thaliana (Mouse-ear cress), partial (40%) [TC372455]	gb|EMT26919,1| hypothetical protein F775_25869 [Aegilops tauschii]
A_99_P315376	0.0198232	0.00365086	-2.9558	-1.56355	2.9558		Rep: Chromosome chr2 scaffold_11, whole genome shotgun sequence - Vitis vinifera (Grape), partial (58%) [TC458805]	dbj|BAJ93880,1| predicted protein [Hordeum vulgare subsp, vulgare]
A_99_P453002	0.0150951	0.00147531	-2.94634	-1.55892	2.94634		Rep: Os06g0326400 protein - Oryza sativa subsp, japonica (Rice), partial (30%) [TC405788]	gb|EPS60399,1| hypothetical protein M569_14404, partial [Genlisea aurea]
A_99_P259896	0.0155934	0.0021112	-2.94633	-1.55892	2.94633		Rep: F12M16,12 - Arabidopsis thaliana (Mouse-ear cress), partial (40%) [TC372455]	gb|EMT26919,1| hypothetical protein F775_25869 [Aegilops tauschii]
A_99_P013444	0.024519	0.00595582	-2.94142	-1.55651	2.94142		BJ288427 Y, Ogihara unpublished cDNA library, Wh_SL Triticum aestivum cDNA clone whsl14g14 5', mRNA sequence [BJ288427]	ref|NP_001043637,2| Os01g0628700 [Oryza sativa Japonica Group] dbj|BAF05551,2| Os01g0628700, partial [Oryza sativa Japonica Group]
A_99_P345181	0.0263231	0.0070581	-2.93148	-1.55163	2.93148			gb|EMS54580,1| hypothetical protein TRIUR3_19692 [Triticum urartu]
A_99_P018769	0.0250058	0.00629974	-2.89107	-1.53161	2.89107		Triticum aestivum cDNA, clone: WT011_H07, cultivar: Chinese Spring [AK334906]	N/A
A_99_P268456	0.0166121	0.00252917	-2.8788	-1.52547	2.8788		Triticum aestivum cDNA, clone: WT008_B07, cultivar: Chinese Spring [AK333853]	ref|XP_002452937,1| hypothetical protein SORBIDRAFT_04g035270 [Sorghum bicolor] gb|EES05913,1| hypothetical protein SORBIDRAFT_04g035270 [Sorghum bicolor]
A_99_P226846	0.0282732	0.00809214	-2.86179	-1.51692	2.86179			gb|EXB98556,1| MLO-like protein 6 [Morus notabilis]
A_99_P171319	0.00866946	8.19909e-05	-2.85776	-1.51489	2.85776		BJ277888 Y, Ogihara unpublished cDNA library, Wh_r Triticum aestivum cDNA clone whr13i18 5', mRNA sequence [BJ277888]	gb|EMT15603,1| Anthocyanidin 5,3-O-glucosyltransferase [Aegilops tauschii]
A_99_P113375	0.0202093	0.00389956	-2.85103	-1.51148	2.85103	WAKL2	Triticum aestivum wall-associated kinase-like 2 (WAKL2) mRNA, complete cds, alternatively spliced [DQ177499]	gb|EMT29273,1| Wall-associated receptor kinase 3 [Aegilops tauschii]
A_99_P404162	0.0117549	0.000561014	-2.84123	-1.50652	2.84123		Rep: Chromosome chr7 scaffold_20, whole genome shotgun sequence - Vitis vinifera (Grape), partial (64%) [TC405895]	gb|EMS46845,1| hypothetical protein TRIUR3_29896 [Triticum urartu]
A_99_P309621	0.0323881	0.0110755	-2.83364	-1.50266	2.83364		Rep: 101 kDa heat shock protein - Aegilops umbellulata (Goatgrass), partial (27%) [TC392016]	ref|XP_003083993,1| unnamed protein product [Ostreococcus tauri] emb|CAL57960,1| unnamed protein product [Ostreococcus tauri]
A_99_P529772	0.0127836	0.000861751	-2.83335	-1.50251	2.83335			gb|AAM46868,1|AF490377_1 mutant isoamylase [Hordeum vulgare]
A_99_P531717	0.0343522	0.0123643	-2.78748	-1.47896	2.78748			ref|XP_004487313,1| PREDICTED: protein STRUBBELIG-RECEPTOR FAMILY 3-like isoform X1 [Cicer arietinum] ref|XP_004487314,1| PREDICTED: protein STRUBBELIG-RECEPTOR FAMILY 3-like isoform X2 [Cicer arietinum] ref|XP_004487315,1| PREDICTED: protein STRUBBELIG-RECEPTOR FAMILY 3-like isoform X3 [Cicer arietinum] ref|XP_004487316,1| PREDICTED: protein STRUBBELIG-RECEPTOR FAMILY 3-like isoform X4 [Cicer ar…
A_99_P037259	0.0367721	0.0138953	-2.78595	-1.47817	2.78595		AL827718 p:638 Triticum aestivum cDNA clone C06_p638_plate_15, mRNA sequence [AL827718]	dbj|BAJ92160,1| predicted protein [Hordeum vulgare subsp, vulgare] dbj|BAJ97504,1| predicted protein [Hordeum vulgare subsp, vulgare]
A_99_P450387	0.0154903	0.00203627	-2.78458	-1.47746	2.78458		TSA: Triticum aestivum cultivar Bobwhite isotig20498,flagleaf mRNA sequence [HP629725]	ref|NP_001147408,1| phytosulfokine peptide precursor3 [Zea mays] gb|ACG27399,1| phytosulfokine precursor protein containing protein [Zea mays]
A_99_P148647	0.02219	0.00483785	-2.78241	-1.47633	2.78241		Rep: WRKY transcription factor - Triticum aestivum (Wheat), partial (62%) [TC427131]	gb|EMS56089,1| hypothetical protein TRIUR3_27334 [Triticum urartu]
A_99_P248866	0.0154903	0.00189014	-2.75255	-1.46077	2.75255		TSA: Triticum aestivum cultivar Bobwhite contig00108,flagleaf mRNA sequence [HP609207]	gb|EMS59051,1| E3 ubiquitin-protein ligase MARCH8 [Triticum urartu]
A_99_P377937	0.0250058	0.00625449	-2.73288	-1.45042	2.73288		Rep: Chromosome chr6 scaffold_3, whole genome shotgun sequence - Vitis vinifera (Grape), partial (83%) [TC437178]	dbj|BAJ91679,1| predicted protein [Hordeum vulgare subsp, vulgare]
A_99_P255901	0.0387113	0.0150105	-2.73175	-1.44983	2.73175		Rep: Protein kinase 1 - Aegilops tauschii (Tausch's goatgrass) (Aegilops squarrosa), complete [TC386877]	gb|AHC00227,1| SNF1-type serine-threonine protein kinase [Triticum polonicum]
A_99_P335756	0.0283195	0.00817585	-2.73007	-1.44894	2.73007			ref|XP_007156819,1| hypothetical protein PHAVU_002G020300g [Phaseolus vulgaris] gb|ESW28813,1| hypothetical protein PHAVU_002G020300g [Phaseolus vulgaris]
A_99_P144338	0.0483546	0.0215418	-2.72815	-1.44793	2.72815		CJ851704 Y, Ogihara unpublished cDNA library, whsctal Triticum aestivum cDNA clone whsctal1g19 5', mRNA sequence [CJ851704]	gb|EMT18099,1| Wall-associated receptor kinase 4 [Aegilops tauschii]
A_99_P100425	0.00880151	0.000266163	-2.71147	-1.43907	2.71147		FGAS055802 Triticum aestivum FGAS: Library 2 Gate 3 Triticum aestivum cDNA, mRNA sequence [CV761414]	gb|EMS46597,1| putative mannose-6-phosphate isomerase [Triticum urartu]
A_99_P246906	0.0154903	0.00208485	-2.66308	-1.41309	2.66308		Triticum aestivum cDNA, clone: WT003_D14, cultivar: Chinese Spring [AK332131]	gb|AFW80802,1| hypothetical protein ZEAMMB73_472821 [Zea mays]
A_99_P082200	0.0403589	0.0159589	-2.65678	-1.40968	2.65678		FGAS062490 Triticum aestivum FGAS: Library 2 Gate 3 Triticum aestivum cDNA, mRNA sequence [CV768099]	gb|AEV91165,1| MYB-related protein [Aegilops speltoides] gb|EMT01033,1| DnaJ homolog subfamily C member 2 [Aegilops tauschii]
A_99_P303986	0.0263231	0.0070623	-2.65168	-1.40691	2.65168		Rep: Chromosome chr18 scaffold_59, whole genome shotgun sequence - Vitis vinifera (Grape), partial (50%) [TC426159]	ref|XP_001695100,1| predicted protein [Chlamydomonas reinhardtii] gb|EDP01808,1| predicted protein [Chlamydomonas reinhardtii]
A_99_P000496	0.0441708	0.0185183	-2.65024	-1.40612	2.65024	HSP101c	Triticum aestivum heat shock protein 101 (HSP101c) mRNA, complete cds [AF174433]	ref|XP_006661569,1| PREDICTED: beta-amylase 2, chloroplastic-like [Oryza brachyantha]
A_99_P126975	0.0455805	0.019353	-2.64089	-1.40102	2.64089		CJ716685 Y,Ogihara unpublished cDNA library Wh_VWD Triticum aestivum cDNA clone whvd13d23 5', mRNA sequence [CJ716685]	gb|EMT10243,1| hypothetical protein F775_10103 [Aegilops tauschii]
A_99_P418782	0.0203527	0.0039837	-2.62897	-1.3945	2.62897		Rep: Thiazole biosynthetic enzyme 1-2, chloroplast precursor - Zea mays (Maize), partial (51%) [TC379890]	ref|XP_001753425,1| predicted protein [Physcomitrella patens] gb|EDQ81648,1| predicted protein [Physcomitrella patens]
A_99_P282056	0.0229841	0.00531429	-2.6283	-1.39413	2.6283			emb|CAI93180,1| glycosyltransferase [Triticum aestivum]
A_99_P158637	0.0309593	0.00981134	-2.61895	-1.38899	2.61895			gb|EMS59092,1| Sucrose synthase 1 [Triticum urartu]
A_99_P209036	0.0182468	0.00319704	-2.61865	-1.38882	2.61865			emb|CAQ58078,1| lipoxygenase [Capsicum annuum]
A_99_P272936	0.0219264	0.00461666	-2.61826	-1.38861	2.61826			gb|EMT27272,1| Signal transduction histidine-protein kinase barA [Aegilops tauschii]
A_99_P185849	0.021735	0.00454373	-2.61287	-1.38564	2.61287		TSA: Triticum aestivum cultivar Bobwhite contig00108,flagleaf mRNA sequence [HP609207]	gb|EMS59051,1| E3 ubiquitin-protein ligase MARCH8 [Triticum urartu]
A_99_P531462	0.0127836	0.000964397	-2.60951	-1.38378	2.60951		Rep: Ribose-phosphate pyrophosphokinase 1 - Arabidopsis thaliana (Mouse-ear cress), partial (18%) [TC412770]	gb|AAM65575,1| unknown [Arabidopsis thaliana]
A_99_P518362	0.0393166	0.0153626	-2.60678	-1.38227	2.60678		Rep: Zinc finger protein 1 - Triticum aestivum (Wheat), partial (60%) [TC439770]	N/A
A_99_P014044	0.0351483	0.0128591	-2.60533	-1.38146	2.60533		Rep: Chromosome chr4 scaffold_32, whole genome shotgun sequence - Vitis vinifera (Grape), partial (55%) [TC382872]	gb|EMS66888,1| hypothetical protein TRIUR3_08428 [Triticum urartu]
A_99_P277776	0.0124036	0.000663948	-2.59944	-1.3782	2.59944			gb|ACL54619,1| unknown [Zea mays] gb|AFW79127,1| galactosylgalactosylxylosylprotein 3-beta-glucuronosyltransferase 1 [Zea mays]
A_99_P199721	0.0463284	0.0199242	-2.58613	-1.37079	2.58613		Rep: Wpk4 protein kinase - Triticum aestivum (Wheat), partial (32%) [TC438644]	dbj|BAA34675,1| wpk4 protein kinase [Triticum aestivum]
A_99_P566432	0.0127836	0.000930043	-2.58144	-1.36818	2.58144		TSA: Triticum aestivum cultivar Bobwhite contig00108,flagleaf mRNA sequence [HP609207]	gb|EMT01402,1| Pre-mRNA-splicing factor SYF1 [Aegilops tauschii]
A_99_P502907	0.0229841	0.0053656	-2.57875	-1.36667	2.57875		Rep: Proteasome subunit alpha type - Oryza sativa subsp, japonica (Rice), partial (37%) [TC432973]	ref|XP_006594111,1| PREDICTED: probable LRR receptor-like serine/threonine-protein kinase At1g67720-like isoform X1 [Glycine max] ref|XP_006594112,1| PREDICTED: probable LRR receptor-like serine/threonine-protein kinase At1g67720-like isoform X2 [Glycine max]
A_99_P107635	0.0137036	0.0012265	-2.57404	-1.36403	2.57404		KUCD01_04_F02_T3 WSWR cDNA library Triticum aestivum cDNA, mRNA sequence [DN828913]	gb|EMS50456,1| Auxin-induced protein 5NG4 [Triticum urartu]
A_99_P338376	0.0273036	0.00754281	-2.55944	-1.35583	2.55944			ref|XP_002867456,1| hypothetical protein ARALYDRAFT_491944 [Arabidopsis lyrata subsp, lyrata] gb|EFH43715,1| hypothetical protein ARALYDRAFT_491944 [Arabidopsis lyrata subsp, lyrata]
A_99_P500527	0.0262901	0.0070011	-2.5568	-1.35434	2.5568		Triticum aestivum cDNA, clone: WT008_B07, cultivar: Chinese Spring [AK333853]	ref|XP_001785789,1| predicted protein [Physcomitrella patens] gb|EDQ49396,1| predicted protein [Physcomitrella patens]
A_99_P053422	0.0154903	0.001989	-2.54716	-1.34889	2.54716		wre1n,pk0127,f1 wre1n Triticum aestivum cDNA clone wre1n,pk0127,f1 5' end, mRNA sequence [CA648062]	dbj|BAJ98203,1| predicted protein [Hordeum vulgare subsp, vulgare] dbj|BAK02528,1| predicted protein [Hordeum vulgare subsp, vulgare] dbj|BAJ95865,1| predicted protein [Hordeum vulgare subsp, vulgare]
A_99_P202341	0.0226825	0.00514835	-2.54637	-1.34844	2.54637		Rep: Mll7708 protein - Rhizobium loti (Mesorhizobium loti), partial (6%) [TC453887]	dbj|BAJ92079,1| predicted protein [Hordeum vulgare subsp, vulgare]
A_99_P173004	0.0154903	0.00196517	-2.53521	-1.34211	2.53521		Triticum aestivum cDNA, clone: WT003_D14, cultivar: Chinese Spring [AK332131]	gb|EMT17990,1| Monothiol glutaredoxin-S5 [Aegilops tauschii]
A_99_P500372	0.0417671	0.0170478	-2.53075	-1.33957	2.53075		Triticum aestivum cDNA, clone: WT013_N08, cultivar: Chinese Spring [AK335811]	gb|EMT28193,1| DNA polymerase delta small subunit [Aegilops tauschii]
A_99_P131315	0.0120927	0.000608925	-2.53071	-1.33954	2.53071	WCO1	Triticum aestivum WCO1 mRNA for B-box transcription factor, complete cds [AB361064]	dbj|BAG12868,1| B-box transcription factor [Triticum aestivum]
A_99_P537227	0.00910672	0.000295056	-2.52249	-1.33485	2.52249		Rep: Cyclin-P1-1 - Oryza sativa subsp, japonica (Rice), partial (26%) [TC447392]	gb|EMT30181,1| hypothetical protein F775_06184 [Aegilops tauschii]
A_99_P400502	0.0323881	0.0110583	-2.51764	-1.33207	2.51764		Rep: HSF-type DNA-binding domain containing protein, expressed - Oryza sativa subsp, japonica (Rice), partial (43%) [TC423045]	gb|EMS60951,1| Heat stress transcription factor A-2d [Triticum urartu]
A_99_P313316	0.0483067	0.0213008	-2.50609	-1.32544	2.50609		Triticum aestivum cDNA, clone: WT004_E03, cultivar: Chinese Spring [AK332548]	N/A
A_99_P364556	0.0403918	0.0160843	-2.49809	-1.32083	2.49809		Rep: Disease resistance protein RPM1 homolog - Sorghum bicolor (Sorghum) (Sorghum vulgare), partial (11%) [TC392782]	ref|XP_003619902,1| Disease resistance protein [Medicago truncatula] gb|AES76120,1| Disease resistance protein [Medicago truncatula]
A_99_P542967	0.0235894	0.00560088	-2.49747	-1.32047	2.49747		Triticum aestivum cDNA, clone: WT002_J12, cultivar: Chinese Spring [AK331877]	gb|EMS59051,1| E3 ubiquitin-protein ligase MARCH8 [Triticum urartu]
A_99_P313734	0.0246201	0.00601715	-2.4973	-1.32037	2.4973		Rep: Predicted protein - Physcomitrella patens subsp, patens, partial (8%) [TC426673]	gb|EMT28219,1| hypothetical protein F775_25180 [Aegilops tauschii]
A_99_P466027	0.0483067	0.0214483	-2.49624	-1.31976	2.49624		Rep: CG4645-PA - Drosophila melanogaster (Fruit fly), partial (6%) [TC414262]	gb|EMS58662,1| hypothetical protein TRIUR3_01532 [Triticum urartu]
A_99_P429112	0.0302265	0.00932822	-2.49228	-1.31747	2.49228			dbj|BAJ94368,1| predicted protein [Hordeum vulgare subsp, vulgare] dbj|BAJ90612,1| predicted protein [Hordeum vulgare subsp, vulgare] dbj|BAK05277,1| predicted protein [Hordeum vulgare subsp, vulgare]
A_99_P514912	0.0166121	0.00261303	-2.47881	-1.30965	2.47881		Rep: Monothiol glutaredoxin-S9 - Oryza sativa subsp, japonica (Rice), partial (54%) [TC438297]	gb|EMT17990,1| Monothiol glutaredoxin-S5 [Aegilops tauschii]
A_99_P389497	0.0339595	0.0119171	-2.474	-1.30684	2.474			ref|XP_002535129,1| conserved hypothetical protein [Ricinus communis] gb|EEF27256,1| conserved hypothetical protein [Ricinus communis]
A_99_P496507	0.0255813	0.00660743	-2.4527	-1.29437	2.4527		Rep: RRNA intron-encoded homing endonuclease - Oryza sativa (Rice), partial (53%) [TC430188]	ref|XP_002949854,1| hypothetical protein VOLCADRAFT_90307 [Volvox carteri f, nagariensis] gb|EFJ48957,1| hypothetical protein VOLCADRAFT_90307 [Volvox carteri f, nagariensis]
A_99_P035024	0.0441118	0.018444	-2.44312	-1.28873	2.44312		TSA: Triticum aestivum contig02407,TraeRec mRNA sequence [JP208778]	gb|EMT25190,1| hypothetical protein F775_13111 [Aegilops tauschii]
A_99_P280801	0.0296086	0.00895146	-2.4419	-1.288	2.4419		Rep: Calmodulin-related protein - Oryza sativa subsp, japonica (Rice), partial (51%) [TC411447]	ref|XP_002269383,2| PREDICTED: uncharacterized protein LOC100253928 [Vitis vinifera]
A_99_P134095	0.0454754	0.0192717	-2.44101	-1.28748	2.44101		TSA: Triticum aestivum cultivar Bobwhite isotig14392,flagleaf mRNA sequence [HP623606]	ref|XP_006646562,1| PREDICTED: ribonuclease 2-like [Oryza brachyantha]
A_99_P345056	0.0159307	0.00218313	-2.43994	-1.28685	2.43994			ref|XP_006285058,1| hypothetical protein CARUB_v10006367mg [Capsella rubella] gb|EOA17956,1| hypothetical protein CARUB_v10006367mg [Capsella rubella]
A_99_P292546	0.0154903	0.0020375	-2.43731	-1.28529	2.43731			gb|AFQ60149,1| SNAP34 [Triticum aestivum]
A_99_P246876	0.0154903	0.00200395	-2.43476	-1.28378	2.43476		Triticum aestivum cDNA, clone: WT003_D14, cultivar: Chinese Spring [AK332131]	N/A
A_99_P286756	0.00952029	0.000330173	-2.42715	-1.27926	2.42715		Rep: Mitogen-activated protein kinase 8 - Oryza sativa subsp, japonica (Rice), partial (26%) [TC398882]	ref|XP_006374750,1| hypothetical protein POPTR_0014s004701g, partial [Populus trichocarpa] gb|ERP52547,1| hypothetical protein POPTR_0014s004701g, partial [Populus trichocarpa]
A_99_P137460	0.0246519	0.00603719	-2.41805	-1.27384	2.41805		FGAS053598 Triticum aestivum FGAS: Library 2 Gate 3 Triticum aestivum cDNA, mRNA sequence [CV759216]	emb|CAI93180,1| glycosyltransferase [Triticum aestivum]
A_99_P262746	0.0284013	0.00832672	-2.41502	-1.27204	2.41502			gb|EMS57373,1| Calcium-dependent protein kinase 7 [Triticum urartu]
A_99_P391612	0.0154903	0.00193566	-2.39692	-1.26118	2.39692		Rep: Chromosome undetermined scaffold_130, whole genome shotgun sequence - Vitis vinifera (Grape), partial (14%) [TC438813]	ref|XP_007023517,1| Uncharacterized protein TCM_027551 [Theobroma cacao] gb|EOY26139,1| Uncharacterized protein TCM_027551 [Theobroma cacao]
A_99_P411142	0.0154903	0.001855	-2.39353	-1.25914	2.39353		Rep: NBS-LRR resistance-like protein - Hordeum vulgare (Barley), partial (13%) [TC373207]	ref|XP_007160477,1| hypothetical protein PHAVU_002G325300g [Phaseolus vulgaris] gb|ESW32471,1| hypothetical protein PHAVU_002G325300g [Phaseolus vulgaris]
A_99_P092620	0.0421451	0.017328	-2.38275	-1.25263	2.38275		TSA: Triticum aestivum contig13850,TraeRec mRNA sequence [JP218984]	dbj|BAK04913,1| predicted protein [Hordeum vulgare subsp, vulgare]
A_99_P355711	0.0283008	0.00815049	-2.38046	-1.25124	2.38046		Rep: Somatic embryogenesis related protein - Dactylis glomerata (Orchard grass) (Cock's-foot grass), partial (95%) [TC404051]	gb|EMT03756,1| Protein WRKY1 [Aegilops tauschii]
A_99_P248846	0.0261569	0.00687447	-2.37681	-1.24903	2.37681		Triticum aestivum cDNA, clone: WT002_J12, cultivar: Chinese Spring [AK331877]	emb|CAI93180,1| glycosyltransferase [Triticum aestivum]
A_99_P449167	0.0140372	0.00127107	-2.3736	-1.24708	2.3736		Rep: Chloroplast reductoisomerase - Oryza sativa subsp, indica (Rice), partial (56%) [TC403107]	gb|EMT12226,1| Ketol-acid reductoisomerase, chloroplastic [Aegilops tauschii]
A_99_P377992	0.0263772	0.00708995	-2.36938	-1.24451	2.36938		Rep: Chromosome chr19 scaffold_4, whole genome shotgun sequence - Vitis vinifera (Grape), partial (29%) [TC442656]	gb|EMT00860,1| Ribosomal protein L11 methyltransferase [Aegilops tauschii]
A_99_P292561	0.0154903	0.00191441	-2.36705	-1.24309	2.36705		Rep: SNAP-34 - Hordeum vulgare var, distichum (Two-rowed barley), partial (87%) [TC375443]	gb|EMS62124,1| SNAP25 homologous protein SNAP33 [Triticum urartu]
A_99_P208631	0.0203527	0.00397173	-2.36663	-1.24283	2.36663			gb|EMT13152,1| hypothetical protein F775_31310 [Aegilops tauschii]
A_99_P453942	0.0462868	0.0198833	-2.36496	-1.24181	2.36496			gb|EMT25707,1| Galactoside 2-alpha-L-fucosyltransferase [Aegilops tauschii]
A_99_P569262	0.0283008	0.00812284	-2.35403	-1.23513	2.35403			gb|AAP53887,2| retrotransposon protein, putative, Ty1-copia subclass [Oryza sativa Japonica Group]
A_99_P345151	0.0359335	0.0133431	-2.34638	-1.23044	2.34638		Rep: Expressed protein - Oryza sativa subsp, japonica (Rice), partial (25%) [TC417753]	gb|EMT10243,1| hypothetical protein F775_10103 [Aegilops tauschii]
A_99_P347016	0.0362953	0.013604	-2.32893	-1.21967	2.32893			gb|EMS62989,1| hypothetical protein TRIUR3_17211 [Triticum urartu]
A_99_P480327	0.0203527	0.00399152	-2.32188	-1.2153	2.32188		Rep: Fatty acid desaturase - Zea mays (Maize), partial (87%) [TC422303]	gb|AFJ66197,1| hypothetical protein 7G9,16 [Boechera stricta]
A_99_P531562	0.0127836	0.000935845	-2.30159	-1.20263	2.30159		Rep: HAP3-like transcriptional-activator - Oryza sativa subsp, indica (Rice), partial (25%) [TC445153]	ref|XP_004235228,1| PREDICTED: transcription elongation factor A protein 3-like isoform 2 [Solanum lycopersicum]
A_99_P163227	0.0454754	0.0192654	-2.29339	-1.19748	2.29339		Rep: Bifunctional aspartokinase/homoserine dehydrogenase 2, chloroplast precursor (AK-HD 2) (AK-HSDH 2) [Includes: Aspartokinase ; Homoserine dehydrogenase ] - Zea mays (Maize), partial (42%) [TC388532]	ref|XP_006643869,1| PREDICTED: protein ALWAYS EARLY 3-like [Oryza brachyantha]
A_99_P301951	0.0107156	0.000400036	-2.29009	-1.1954	2.29009			emb|CAI93180,1| glycosyltransferase [Triticum aestivum]
A_99_P281226	0.0263231	0.00702511	-2.28295	-1.1909	2.28295		Rep: Chromosome chr11 scaffold_118, whole genome shotgun sequence - Vitis vinifera (Grape), partial (57%) [TC402894]	ref|XP_002448904,1| hypothetical protein SORBIDRAFT_05g001190 [Sorghum bicolor] gb|EES07892,1| hypothetical protein SORBIDRAFT_05g001190 [Sorghum bicolor]
A_99_P381502	0.0111988	0.000479392	-2.27756	-1.18749	2.27756		Rep: Uncharacterized plant-specific domain TIGR01615 family protein, expressed - Oryza sativa subsp, japonica (Rice), partial (13%) [TC446415]	N/A
A_99_P161307	0.0162527	0.00228546	-2.2715	-1.18364	2.2715	NAC2	Triticum aestivum NAC domain transcription factor (NAC2) mRNA, complete cds [AY625683]	gb|AAU08786,1| NAC domain transcription factor [Triticum aestivum] gb|ADE59455,1| NAC transcription factor 2A [Triticum aestivum] gb|AEX60737,1| stress-induced NAC transcription factor [Triticum aestivum]
A_99_P080395	0.0313308	0.010324	-2.2669	-1.18072	2.2669	LOC100125710	Triticum aestivum cDNA, clone: WT012_G08, cultivar: Chinese Spring [AK335233]	dbj|BAK01032,1| predicted protein [Hordeum vulgare subsp, vulgare]
A_99_P557882	0.0281761	0.00800824	-2.26661	-1.18054	2.26661		Rep: Monosaccharide transporter 6 - Oryza sativa subsp, japonica (Rice), partial (8%) [TC455223]	emb|CAA59422,1| orf [Oryza sativa]
A_99_P286076	0.0296238	0.00898005	-2.25193	-1.17116	2.25193		Rep: Anthranilate synthase alpha 1 - Camptotheca acuminata, partial (26%) [TC383140]	ref|NP_001060762,1| Os08g0101600 [Oryza sativa Japonica Group] sp|Q8W5R1,1|GENL2_ORYSJ RecName: Full=Flap endonuclease GEN-like 2; AltName: Full=OsSEND-1; AltName: Full=Single-strand DNA endonuclease 1 dbj|BAB72003,1| single-strand DNA endonuclease-1 [Oryza sativa Japonica Group] dbj|BAF22676,1| Os08g0101600 [Oryza sativa Japonica Group] gb|EEE67892,1| hypothetical protein OsJ_25722 [Oryza sativa…
A_99_P194553	0.0230694	0.00540851	-2.25171	-1.17102	2.25171		TSA: Triticum aestivum cultivar Bobwhite isotig17954,flagleaf mRNA sequence [HP627175]	ref|XP_003577762,1| PREDICTED: F-box/WD-40 repeat-containing protein At3g52030-like [Brachypodium distachyon]
A_99_P505027	0.0235265	0.0055625	-2.24614	-1.16745	2.24614			ref|XP_002301465,2| hypothetical protein POPTR_0002s18630g [Populus trichocarpa] gb|EEE80738,2| hypothetical protein POPTR_0002s18630g [Populus trichocarpa]
A_99_P347746	0.0308347	0.00973081	-2.24489	-1.16665	2.24489	LOC100873121	Triticum aestivum cDNA, clone: WT002_N07, cultivar: Chinese Spring [AK331972]	ref|XP_006471095,1| PREDICTED: probable 3-hydroxyisobutyrate dehydrogenase-like 2, mitochondrial-like [Citrus sinensis]
A_99_P337841	0.0204389	0.0040186	-2.23868	-1.16265	2.23868		Rep: Efflux transporter, RND family, MFP subunit - Burkholderia thailandensis (strain E264 / ATCC 700388 / DSM 13276 /CIP 106301), partial (14%) [TC418808]	gb|AAX96202,1| hypothetical protein LOC_Os11g12580 [Oryza sativa Japonica Group] gb|ABA92189,1| hypothetical protein LOC_Os11g12580 [Oryza sativa Japonica Group]
A_99_P312266	0.0305874	0.00959187	-2.23812	-1.16229	2.23812		Rep: GRAS family transcription factor containing protein, expressed - Oryza sativa subsp, japonica (Rice), partial (22%) [TC404123]	N/A
A_99_P504312	0.0473732	0.0207132	-2.22128	-1.15139	2.22128			ref|XP_003568822,1| PREDICTED: uncharacterized protein LOC100844174 [Brachypodium distachyon]
A_99_P525387	0.0342519	0.0122007	-2.22034	-1.15078	2.22034		Rep: ENOD40-like protein - Hordeum vulgare (Barley), complete [TC442947]	tpg|DAA37011,1| TPA_ hypothetical protein ZEAMMB73_737187 [Zea mays] tpg|DAA37012,1| TPA_ hypothetical protein ZEAMMB73_737187 [Zea mays]
A_99_P234606	0.0312817	0.0102767	-2.2197	-1.15037	2.2197		TSA: Triticum aestivum cultivar Bobwhite isotig19348,flagleaf mRNA sequence [HP628570]	ref|XP_002993408,1| hypothetical protein SELMODRAFT_187457 [Selaginella moellendorffii] gb|EFJ05501,1| hypothetical protein SELMODRAFT_187457 [Selaginella moellendorffii]
A_99_P285541	0.0487901	0.02193	-2.21824	-1.14942	2.21824		Rep: GATA zinc finger family protein, expressed - Oryza sativa subsp, japonica (Rice), partial (50%) [TC423400]	ref|XP_004963571,1| PREDICTED: uncharacterized protein LOC101784163 [Setaria italica]
A_99_P487887	0.0226825	0.00513329	-2.21502	-1.14732	2.21502			gb|EMT14985,1| putative Amidophosphoribosyltransferase, chloroplastic [Aegilops tauschii]
A_99_P217336	0.0378809	0.0146131	-2.20868	-1.14318	2.20868		Rep: 50S ribosomal protein L34 - Aquifex aeolicus, partial (36%) [TC431453]	ref|XP_002885362,1| hypothetical protein ARALYDRAFT_898440 [Arabidopsis lyrata subsp, lyrata] gb|EFH61621,1| hypothetical protein ARALYDRAFT_898440 [Arabidopsis lyrata subsp, lyrata]
A_99_P543817	0.0342519	0.0122011	-2.20681	-1.14196	2.20681		Rep: Amidophosphoribosyltransferase - Aquifex aeolicus, partial (4%) [TC449942]	gb|EMT14985,1| putative Amidophosphoribosyltransferase, chloroplastic [Aegilops tauschii]
A_99_P345026	0.0293577	0.00875323	-2.19996	-1.13748	2.19996		Rep: Amidophosphoribosyltransferase - Aquifex aeolicus, partial (4%) [TC449942]	gb|EAY97537,1| hypothetical protein OsI_19465 [Oryza sativa Indica Group]
A_99_P473132	0.0411354	0.0166396	-2.19977	-1.13735	2.19977		Rep: Glycosyltransferase - Triticum aestivum (Wheat), partial (8%) [TC418388]	ref|XP_002506434,1| predicted protein [Micromonas sp, RCC299] gb|ACO67692,1| predicted protein [Micromonas sp, RCC299]
A_99_P425752	0.0162527	0.00226414	-2.19811	-1.13626	2.19811	NAC2	Triticum aestivum NAC domain transcription factor (NAC2) mRNA, complete cds [AY625683]	ref|XP_004962208,1| PREDICTED: pentatricopeptide repeat-containing protein At4g02750-like isoform X1 [Setaria italica]
A_99_P226881	0.0364888	0.0137128	-2.19421	-1.1337	2.19421			gb|EMT20808,1| Protein RUPTURED POLLEN GRAIN 1 [Aegilops tauschii]
A_99_P300106	0.0277959	0.00777636	-2.19322	-1.13305	2.19322		Rep: Cysteine synthase - Vitis vinifera (Grape), partial (46%) [TC390759]	dbj|BAJ90237,1| predicted protein [Hordeum vulgare subsp, vulgare]
A_99_P373092	0.0185189	0.00328159	-2.18459	-1.12737	2.18459		Rep: Possible transcriptional regulator, TetR family protein - Rhodococcus sp, (strain RHA1), partial (8%) [TC445936]	gb|EPS68083,1| hypothetical protein M569_06690, partial [Genlisea aurea]
A_99_P415447	0.0309593	0.00995256	-2.18059	-1.12472	2.18059		Rep: Chromosome chr4 scaffold_6, whole genome shotgun sequence - Vitis vinifera (Grape), partial (13%) [TC376861]	N/A
A_99_P226931	0.0483067	0.0214329	-2.17557	-1.1214	2.17557			gb|EMT03611,1| Protein RUPTURED POLLEN GRAIN 1 [Aegilops tauschii]
A_99_P209991	0.0134496	0.00108454	-2.15322	-1.10649	2.15322			ref|XP_006293149,1| hypothetical protein CARUB_v10019461mg [Capsella rubella] gb|EOA26047,1| hypothetical protein CARUB_v10019461mg [Capsella rubella]
A_99_P343741	0.0105142	0.00038205	-2.15018	-1.10446	2.15018			gb|EMT01093,1| hypothetical protein F775_16963 [Aegilops tauschii]
A_99_P345076	0.0355019	0.0130062	-2.13877	-1.09678	2.13877			gb|EMS56381,1| hypothetical protein TRIUR3_23522 [Triticum urartu]
A_99_P209556	0.0151091	0.00154705	-2.1375	-1.09593	2.1375			ref|XP_002436855,1| hypothetical protein SORBIDRAFT_10g010010 [Sorghum bicolor] gb|EER88222,1| hypothetical protein SORBIDRAFT_10g010010 [Sorghum bicolor]
A_99_P321991	0.0428224	0.017713	-2.13231	-1.09242	2.13231		Rep: Chromosome chr6 scaffold_3, whole genome shotgun sequence - Vitis vinifera (Grape), partial (35%) [TC413505]	N/A
A_99_P306036	0.0344633	0.0125386	-2.12487	-1.08738	2.12487		Rep: Glycosyl transferase-like protein - Triticum aestivum (Wheat), partial (91%) [TC371124]	ref|XP_001763915,1| predicted protein [Physcomitrella patens] gb|EDQ71319,1| predicted protein [Physcomitrella patens]
A_99_P425137	0.0309867	0.0100872	-2.11608	-1.08139	2.11608			ref|XP_002525601,1| conserved hypothetical protein [Ricinus communis] gb|EEF36719,1| conserved hypothetical protein [Ricinus communis]
A_99_P429542	0.018007	0.00304591	-2.11131	-1.07814	2.11131		FGAS043077 Triticum aestivum FGAS: TaLt6 Triticum aestivum cDNA, mRNA sequence [CK168532]	N/A
A_99_P508347	0.0273833	0.0076325	-2.10859	-1.07628	2.10859		Rep: Apospory-associated protein C-like - Oryza sativa subsp, japonica (Rice), partial (90%) [TC370423]	gb|EYU17740,1| hypothetical protein MIMGU_mgv1a018663mg [Mimulus guttatus]
A_99_P096710	0.0283008	0.0081462	-2.10434	-1.07337	2.10434		FGAS062660 Triticum aestivum FGAS: Library 2 Gate 3 Triticum aestivum cDNA, mRNA sequence [CV768269]	gb|ACU00672,1| putative protein [Triticum turgidum subsp, durum]
A_99_P072520	0.0292707	0.00869809	-2.09781	-1.06888	2.09781		AZO2,073A14F000912 AZO2 Triticum aestivum cDNA clone AZO2073A14, mRNA sequence [CD864981]	gb|EMT28254,1| hypothetical protein F775_06906 [Aegilops tauschii]
A_99_P561777	0.0425287	0.0175068	-2.08967	-1.06328	2.08967		Rep: Protamine - Osilinus turbinatus (Snail) (Monodonta turbinata), partial (41%) [TC456752]	ref|XP_004167382,1| PREDICTED: tetratricopeptide repeat protein 13-like [Cucumis sativus]
A_99_P230806	0.0406414	0.0163159	-2.08752	-1.06179	2.08752			gb|EMT04676,1| hypothetical protein F775_43999 [Aegilops tauschii]
A_99_P265636	0.026114	0.00682316	-2.08448	-1.05969	2.08448			ref|XP_005843922,1| hypothetical protein CHLNCDRAFT_9625, partial [Chlorella variabilis] gb|EFN51820,1| hypothetical protein CHLNCDRAFT_9625, partial [Chlorella variabilis]
A_99_P415112	0.0357542	0.0131876	-2.0793	-1.0561	2.0793		Rep: Calcium-dependent protein kinase - Lilium longiflorum (Trumpet lily), partial (87%) [TC376621]	ref|NP_001137102,1| uncharacterized protein LOC100217278 [Zea mays] gb|ACF83267,1| unknown [Zea mays]
A_99_P489987	0.0289361	0.00852672	-2.07349	-1.05206	2.07349		Rep: LigA - Methylobacterium sp, 4-46, partial (6%) [TC427177]	ref|XP_006848288,1| hypothetical protein AMTR_s00013p00097650 [Amborella trichopoda] gb|ERN09869,1| hypothetical protein AMTR_s00013p00097650 [Amborella trichopoda]
A_99_P420907	0.0403475	0.0159261	-2.07263	-1.05146	2.07263		Rep: Thiazole biosynthetic enzyme 1-2, chloroplast precursor - Zea mays (Maize), partial (69%) [TC381403]	gb|EMT30436,1| Thiazole biosynthetic enzyme 1-2, chloroplastic [Aegilops tauschii]
A_99_P493022	0.0445579	0.0187192	-2.06726	-1.04772	2.06726		Rep: Glr2237 protein - Gloeobacter violaceus, partial (4%) [TC428644]	gb|EMT25282,1| hypothetical protein F775_07249 [Aegilops tauschii]
A_99_P141083	0.031524	0.0104191	-2.06602	-1.04685	2.06602	Wdreb2	Triticum aestivum DREB transcription factor 5A (DREB5) mRNA, complete cds, alternatively spliced [AY781358]	gb|EMS56588,1| hypothetical protein TRIUR3_35318 [Triticum urartu]
A_99_P418672	0.0331309	0.0114614	-2.06485	-1.04604	2.06485		Rep: Histidine kinase - Zea mays (Maize), partial (10%) [TC379586]	ref|XP_002298871,2| hypothetical protein POPTR_0001s37690g [Populus trichocarpa] gb|EEE83676,2| hypothetical protein POPTR_0001s37690g [Populus trichocarpa]
A_99_P280901	0.0461692	0.0197638	-2.05551	-1.03949	2.05551		Rep: Thylakoid membrane phosphoprotein 14 kDa, chloroplast precursor - Arabidopsis thaliana (Mouse-ear cress), partial (53%) [TC409977]	ref|XP_003563146,1| PREDICTED: thylakoid membrane phosphoprotein 14 kDa, chloroplastic-like [Brachypodium distachyon]
A_99_P448302	0.0226825	0.00512769	-2.0539	-1.03836	2.0539			gb|EMT27272,1| Signal transduction histidine-protein kinase barA [Aegilops tauschii]
A_99_P200016	0.00880151	0.000210223	-2.04647	-1.03314	2.04647			dbj|BAK01533,1| predicted protein [Hordeum vulgare subsp, vulgare]
A_99_P144213	0.0252088	0.00643708	-2.03814	-1.02725	2.03814		Rep: Efflux transporter, RND family, MFP subunit - Burkholderia thailandensis (strain E264 / ATCC 700388 / DSM 13276 /CIP 106301), partial (14%) [TC418808]	gb|EMT08068,1| hypothetical protein F775_19599 [Aegilops tauschii]
A_99_P294896	0.0154903	0.00180421	-2.03086	-1.02209	2.03086		Rep: LigA - Methylobacterium sp, 4-46, partial (4%) [TC401170]	ref|XP_002443579,1| hypothetical protein SORBIDRAFT_08g021870 [Sorghum bicolor] gb|EES17417,1| hypothetical protein SORBIDRAFT_08g021870 [Sorghum bicolor]
A_99_P272926	0.0164557	0.00239407	-2.02846	-1.02039	2.02846		Rep: Histidine kinase - Zea mays (Maize), partial (10%) [TC379586]	ref|XP_006584179,1| PREDICTED: uncharacterized protein At1g01500-like [Glycine max]
A_99_P297901	0.0180276	0.0030689	-2.02456	-1.01761	2.02456			ref|XP_003593809,1| Heat stress transcription factor A-4a [Medicago truncatula] gb|AES64060,1| Heat stress transcription factor A-4a [Medicago truncatula]
A_99_P453197	0.0311772	0.0102021	-2.02455	-1.0176	2.02455			ref|XP_006478019,1| PREDICTED: BTB/POZ domain-containing protein At1g04390-like isoform X1 [Citrus sinensis]
A_99_P343986	0.0135537	0.00114223	-2.02293	-1.01645	2.02293		TSA: Triticum aestivum cultivar Bobwhite isotig17954,flagleaf mRNA sequence [HP627175]	dbj|BAF02546,1| triticain alpha [Triticum aestivum] gb|AFK80346,1| cysteine endopeptidase EP alpha [Secale cereale x Triticum turgidum subsp, durum]
A_99_P275561	0.0168988	0.00272301	-2.01992	-1.0143	2.01992		Triticum aestivum cDNA, clone: WT006_L07, cultivar: Chinese Spring [AK333533]	gb|AAM08513,1|AC068654_15 Putative O-deacetylbaccatin III-10-0-acetyltransferase [Oryza sativa Japonica Group] gb|AAP51818,1| Transferase family protein [Oryza sativa Japonica Group] gb|EAZ15081,1| hypothetical protein OsJ_30493 [Oryza sativa Japonica Group]
A_99_P302861	0.0240323	0.0057871	-2.00524	-1.00377	2.00524			ref|XP_004515906,1| PREDICTED: uncharacterized protein LOC101490805 [Cicer arietinum]
A_99_P420627	0.0154903	0.00177076	-1.99654	-0.9975	1.99654		Rep: Chromosome chr18 scaffold_1, whole genome shotgun sequence - Vitis vinifera (Grape), partial (59%) [TC381185]	ref|XP_006293149,1| hypothetical protein CARUB_v10019461mg [Capsella rubella] gb|EOA26047,1| hypothetical protein CARUB_v10019461mg [Capsella rubella]
A_99_P315741	0.031838	0.0106021	-1.99455	-0.996062	1.99455		Rep: Os02g0629400 protein - Oryza sativa subsp, japonica (Rice), partial (56%) [TC389914]	ref|XP_006851486,1| hypothetical protein AMTR_s00040p00143220 [Amborella trichopoda] gb|ERN13067,1| hypothetical protein AMTR_s00040p00143220 [Amborella trichopoda]
A_99_P468112	0.0166121	0.00256065	-1.98347	-0.988026	1.98347		Rep: Chromosome chr18 scaffold_1, whole genome shotgun sequence - Vitis vinifera (Grape), partial (62%) [TC403334]	ref|XP_002436855,1| hypothetical protein SORBIDRAFT_10g010010 [Sorghum bicolor] gb|EER88222,1| hypothetical protein SORBIDRAFT_10g010010 [Sorghum bicolor]
A_99_P423527	0.0154903	0.00208531	-1.97954	-0.985165	1.97954		Rep: Predicted protein - Pichia stipitis (Yeast), partial (4%) [TC383597]	gb|EEE53724,1| hypothetical protein OsJ_00068 [Oryza sativa Japonica Group]
A_99_P000406	0.0336319	0.0117352	-1.97343	-0.980706	1.97343	PCS1	Triticum aestivum phytochelatin synthase (PCS1) mRNA, complete cds [AF093752]	gb|EMT23611,1| Glutathione gamma-glutamylcysteinyltransferase 1 [Aegilops tauschii]
A_99_P162327	0.0234508	0.00553294	-1.96775	-0.97655	1.96775		FGAS015686 Triticum aestivum FGAS: Library 4 Gate 8 Triticum aestivum cDNA, mRNA sequence [CK163071]	ref|XP_004145463,1| PREDICTED: uncharacterized protein LOC101203162 [Cucumis sativus]
A_99_P433467	0.0150442	0.00146023	-1.96761	-0.976441	1.96761			ref|NP_174348,1| subtilase-like protein [Arabidopsis thaliana] gb|AAD25747,1|AC007060_5 Strong similarity to gb|U80583 proteinase TMP from Lycopersicon esculentum and is a member of the PF|00082 subtilase family [Arabidopsis thaliana] gb|AAL59964,1| putative serine proteinase [Arabidopsis thaliana] gb|AAM20050,1| putative serine proteinase [Arabidopsis thaliana] gb|AEE31248,1| subtilase-like prot…
A_99_P128310	0.0166121	0.0025483	-1.96011	-0.970933	1.96011	Myb2	FGAS084153 Triticum aestivum FGAS: Library 6 CAP GATE 1 Triticum aestivum cDNA, mRNA sequence [DR738936]	gb|EMT12739,1| Myb-related protein Myb4 [Aegilops tauschii]
A_99_P562472	0.0154903	0.00201168	-1.94469	-0.959541	1.94469			ref|NP_174348,1| subtilase-like protein [Arabidopsis thaliana] gb|AAD25747,1|AC007060_5 Strong similarity to gb|U80583 proteinase TMP from Lycopersicon esculentum and is a member of the PF|00082 subtilase family [Arabidopsis thaliana] gb|AAL59964,1| putative serine proteinase [Arabidopsis thaliana] gb|AAM20050,1| putative serine proteinase [Arabidopsis thaliana] gb|AEE31248,1| subtilase-like prot…
A_99_P232431	0.00523595	2.34562e-05	-1.93918	-0.955448	1.93918		Rep: Aluminum-induced protein-like protein - Setaria italica (Foxtail millet), partial (75%) [TC424547]	gb|EMT03178,1| hypothetical protein F775_26866 [Aegilops tauschii]
A_99_P022359	0.0225474	0.00501453	-1.93792	-0.954509	1.93792		Rep: RNA-binding protein-like - Oryza sativa subsp, japonica (Rice), partial (41%) [TC437692]	ref|XP_003630128,1| Spatacsin [Medicago truncatula] gb|AET04604,1| Spatacsin [Medicago truncatula]
A_99_P232411	0.0207971	0.00413043	-1.92636	-0.945878	1.92636			gb|EMT03178,1| hypothetical protein F775_26866 [Aegilops tauschii]
A_99_P534647	0.0454754	0.0192499	-1.91997	-0.941083	1.91997	PCS1	Triticum aestivum phytochelatin synthase (PCS1) mRNA, complete cds [AF093752]	emb|CAN60970,1| hypothetical protein VITISV_026408 [Vitis vinifera]
A_99_P271941	0.0213423	0.00438744	-1.91719	-0.938995	1.91719		Rep: Proline transporter - Hordeum vulgare (Barley), partial (33%) [TC431046]	ref|XP_004145463,1| PREDICTED: uncharacterized protein LOC101203162 [Cucumis sativus]
A_99_P508212	0.0181654	0.00313232	-1.91322	-0.936002	1.91322			gb|EMT33359,1| Cysteine synthase, chloroplastic/chromoplastic [Aegilops tauschii]
A_99_P272966	0.0108248	0.000410749	-1.9071	-0.93138	1.9071	Tamyb7	FGAS021512 Triticum aestivum FGAS: Library 5 GATE 7 Triticum aestivum cDNA, mRNA sequence [CK209733]	gb|EEC74141,1| hypothetical protein OsI_09212 [Oryza sativa Indica Group]
A_99_P453952	0.00880151	0.000138968	-1.90673	-0.931103	1.90673	Tamyb7	FGAS021512 Triticum aestivum FGAS: Library 5 GATE 7 Triticum aestivum cDNA, mRNA sequence [CK209733]	dbj|BAE80457,1| myb-related protein [Triticum aestivum]
A_99_P247801	0.0207944	0.00411955	-1.89642	-0.923279	1.89642		Triticum aestivum cDNA, clone: SET4_C19, cultivar: Chinese Spring [AK330319]	ref|XP_004487227,1| PREDICTED: uncharacterized protein LOC101496462 [Cicer arietinum]
A_99_P412687	0.0225474	0.00505044	-1.89457	-0.92187	1.89457			gb|EMT02285,1| hypothetical protein F775_30854 [Aegilops tauschii]
A_99_P315036	0.0421227	0.0172978	-1.88387	-0.913699	1.88387			gb|EMS52090,1| hypothetical protein TRIUR3_21512 [Triticum urartu]
A_99_P198211	0.00880151	0.000149384	-1.88337	-0.91332	1.88337			N/A
A_99_P526307	0.0273833	0.00760796	-1.87526	-0.907092	1.87526		EST236 Stress treated wheat cDNA libraries from the FGAS project Triticum aestivum cDNA clone 10,1,5, mRNA sequence [DY761340]	dbj|BAJ95289,1| predicted protein [Hordeum vulgare subsp, vulgare]
A_99_P237461	0.0226825	0.00514844	-1.85788	-0.893661	1.85788	WCK-1	TSA: Triticum aestivum cultivar Bobwhite isotig15773,flagleaf mRNA sequence [HP624992]	gb|EMT08915,1| hypothetical protein F775_52499 [Aegilops tauschii]
A_99_P160347	0.0166121	0.0025906	-1.85522	-0.891594	1.85522		Rep: MAP kinase - Triticum aestivum (Wheat), complete [TC368724]	N/A
A_99_P354631	0.0248395	0.00619442	-1.84023	-0.879884	1.84023		Rep: Triacylglycerol lipase like protein - Arabidopsis thaliana (Mouse-ear cress), partial (13%) [TC425602]	dbj|BAK07023,1| predicted protein [Hordeum vulgare subsp, vulgare] dbj|BAK00183,1| predicted protein [Hordeum vulgare subsp, vulgare]
A_99_P155612	0.032278	0.0109254	-1.82752	-0.869884	1.82752		Rep: Hox1w - Petromyzon marinus (Sea lamprey), partial (7%) [TC380605]	N/A
A_99_P246026	0.0292707	0.00868883	-1.82674	-0.869271	1.82674			gb|AAB18208,1| cold acclimation protein WCOR615 [Triticum aestivum] gb|EMS61758,1| hypothetical protein TRIUR3_22815 [Triticum urartu]
A_99_P204126	0.0341306	0.0120961	-1.81351	-0.858787	1.81351			emb|CAQ58078,1| lipoxygenase [Capsicum annuum]
A_99_P248756	0.0225474	0.00499273	-1.8107	-0.856545	1.8107		TSA: Triticum aestivum cultivar Bobwhite isotig06467,flagleaf mRNA sequence [HP615644]	gb|AAO72595,1| putative protein kinase [Oryza sativa Japonica Group]
A_99_P518672	0.0397859	0.0155856	-1.80833	-0.854658	1.80833		Rep: Protein EGG APPARATUS-1 - Zea mays (Maize), partial (46%) [TC439978]	dbj|BAJ86484,1| predicted protein [Hordeum vulgare subsp, vulgare] dbj|BAJ87205,1| predicted protein [Hordeum vulgare subsp, vulgare]
A_99_P213796	0.0256024	0.00663955	-1.79708	-0.845654	1.79708			dbj|BAF79926,1| group3 late embryogenesis abundant protein [Triticum aestivum]
A_99_P208346	0.0188846	0.00339341	-1.79489	-0.843895	1.79489		TSA: Triticum aestivum cultivar Bobwhite isotig21701,flagleaf mRNA sequence [HP630914]	ref|XP_003605555,1| hypothetical protein MTR_4g033730 [Medicago truncatula] gb|AES87752,1| hypothetical protein MTR_4g033730 [Medicago truncatula]
A_99_P331906	0.0140372	0.00127598	-1.78419	-0.835266	1.78419		Rep: Chromosome chr2 scaffold_11, whole genome shotgun sequence - Vitis vinifera (Grape), partial (18%) [TC415498]	N/A
A_99_P177974	0.0283766	0.00822061	-1.78403	-0.835136	1.78403	LOC100125723	Triticum aestivum pathogen-inducible transcription factor ERF3 mRNA, complete cds [EF570122]	gb|AFK45974,1| unknown [Medicago truncatula]
A_99_P429057	0.0267396	0.00726721	-1.77123	-0.824752	1.77123		Rep: Ethylene-responsive element binding protein 2 - Triticum aestivum (Wheat), partial (18%) [TC387694]	emb|CAI93180,1| glycosyltransferase [Triticum aestivum]
A_99_P533537	0.019785	0.00363397	-1.76718	-0.821452	1.76718		Rep: Predicted protein - Monosiga brevicollis MX1, partial (5%) [TC445938]	gb|EEC82710,1| hypothetical protein OsI_27382 [Oryza sativa Indica Group]
A_99_P462477	0.0393642	0.0154008	-1.74104	-0.799951	1.74104			ref|XP_002971378,1| hypothetical protein SELMODRAFT_412051 [Selaginella moellendorffii] gb|EFJ27127,1| hypothetical protein SELMODRAFT_412051 [Selaginella moellendorffii]
A_99_P058371	0.0279432	0.00788639	-1.72617	-0.787575	1.72617		Rep: Os05g0524100 protein - Oryza sativa subsp, japonica (Rice), partial (31%) [TC457925]	dbj|BAJ90839,1| predicted protein [Hordeum vulgare subsp, vulgare] dbj|BAJ96394,1| predicted protein [Hordeum vulgare subsp, vulgare]
A_99_P440457	0.0248395	0.00619152	-1.70492	-0.769705	1.70492		Rep: Hox1w - Petromyzon marinus (Sea lamprey), partial (7%) [TC380605]	N/A
A_99_P356691	0.0202299	0.0039171	-1.64785	-0.720587	1.64785			gb|AAT73643,1| hypothetical protein [Oryza sativa Japonica Group] gb|AAU90158,1| hypothetical protein [Oryza sativa Japonica Group]
A_99_P334386	0.0147609	0.00138866	-1.63241	-0.707004	1.63241			gb|ABK24926,1| unknown [Picea sitchensis]
A_99_P085805	0.0131783	0.00104298	-1.62666	-0.701914	1.62666		Rep: Chromosome chr14 scaffold_21, whole genome shotgun sequence - Vitis vinifera (Grape), partial (14%) [TC381361]	N/A
A_99_P272321	0.00880151	0.000194783	-1.62587	-0.701208	1.62587		Triticum aestivum cDNA, clone: SET2_K08, cultivar: Chinese Spring [AK335769]	ref|XP_003626057,1| Peptide chain release factor [Medicago truncatula] gb|AES82275,1| Peptide chain release factor [Medicago truncatula]
A_99_P118455	0.0127836	0.000940127	-1.61087	-0.687838	1.61087		CJ688773 Y,Ogihara unpublished cDNA library Wh_RDr Triticum aestivum cDNA clone whrd15f16 5', mRNA sequence [CJ688773]	ref|XP_003083971,1| delta 12 fatty acid desaturase (ISS) [Ostreococcus tauri] emb|CAL57938,1| delta 12 fatty acid desaturase (ISS) [Ostreococcus tauri]
A_99_P479147	0.0108248	0.000414886	-1.60677	-0.684167	1.60677		Rep: Transcription factor Myb2 - Triticum aestivum (Wheat), partial (69%) [TC421665]	gb|ABA94124,1| transposon protein, putative, Mutator sub-class [Oryza sativa Japonica Group]
A_99_P272971	0.00910672	0.000295511	-1.48858	-0.573934	1.48858		Rep: Transcription factor Myb2 - Triticum aestivum (Wheat), partial (79%) [TC384792]	gb|AAT37168,1| transcription factor Myb2 [Triticum aestivum]
A_99_P338771	0.00653832	4.62741e-05	-1.47672	-0.5624	1.47672		Rep: C2 domain-containing protein - Hordeum vulgare var, distichum (Two-rowed barley), partial (22%) [TC445562]	N/A
A_99_P465672	0.0124036	0.000691488	-1.41239	-0.49814	1.41239			gb|EMS59060,1| 2-aminoethanethiol dioxygenase [Triticum urartu]
A_99_P204656	0.0113247	0.000501556	-1.30085	-0.379451	1.30085			gb|EMS59721,1| Expansin-A4 [Triticum urartu]
A_99_P510857	0.0181654	0.00313758	1.45956	0.545536	1.45956			gb|EYU32688,1| hypothetical protein MIMGU_mgv1a000018mg [Mimulus guttatus]
A_99_P212641	0.0267128	0.00722003	1.594	0.672654	1.594		Rep: Sugar transporter protein - Ananas comosus (Pineapple), partial (26%) [TC381257]	gb|EMT28339,1| Sugar transporter ERD6-like protein 6 [Aegilops tauschii]
A_99_P251936	0.00880151	0.000228134	1.6051	0.682659	1.6051		Rep: Os05g0407100 protein - Oryza sativa subsp, japonica (Rice), partial (71%) [TC420249]	dbj|BAK03654,1| predicted protein [Hordeum vulgare subsp, vulgare] dbj|BAK08228,1| predicted protein [Hordeum vulgare subsp, vulgare]
A_99_P251946	0.0120589	0.000597898	1.6217	0.697507	1.6217		Rep: Os05g0407100 protein - Oryza sativa subsp, japonica (Rice), partial (74%) [TC415290]	dbj|BAK03654,1| predicted protein [Hordeum vulgare subsp, vulgare] dbj|BAK08228,1| predicted protein [Hordeum vulgare subsp, vulgare]
A_99_P335036	0.020185	0.00382696	1.6252	0.700619	1.6252		Rep: Chromosome chr6 scaffold_3, whole genome shotgun sequence - Vitis vinifera (Grape), partial (12%) [TC400164]	gb|EMT06316,1| Glucan endo-1,3-beta-glucosidase 14 [Aegilops tauschii]
A_99_P523067	0.00880151	0.000161495	1.63417	0.708557	1.63417		FGAS074145 Triticum aestivum FGAS: Library 2 Gate 3 Triticum aestivum cDNA, mRNA sequence [CV779736]	dbj|BAK03654,1| predicted protein [Hordeum vulgare subsp, vulgare] dbj|BAK08228,1| predicted protein [Hordeum vulgare subsp, vulgare]
A_99_P004116	0.00880151	0.000141702	1.63966	0.713394	1.63966		FGAS018018 Triticum aestivum FGAS: Library 5 GATE 7 Triticum aestivum cDNA, mRNA sequence [CK206425]	gb|AAX94996,1| Protein kinase domain, putative [Oryza sativa Japonica Group] gb|ABA95430,1| Protein kinase domain containing protein [Oryza sativa Japonica Group]
A_99_P260106	0.0135537	0.00116387	1.66052	0.731639	1.66052			ref|NP_174253,2| putative zinc finger CCCH domain-containing protein 10 [Arabidopsis thaliana] sp|Q9C7P1,2|C3H10_ARATH RecName: Full=Putative zinc finger CCCH domain-containing protein 10; Short=AtC3H10 gb|AEE31109,1| putative zinc finger CCCH domain-containing protein 10 [Arabidopsis thaliana]
A_99_P422322	0.0154903	0.00205308	1.66455	0.735136	1.66455		Rep: GID1-like gibberellin receptor - Hordeum vulgare (Barley), partial (42%) [TC382522]	N/A
A_99_P172374	0.0151091	0.00159419	1.67096	0.740679	1.67096		Rep: Uroporphyrin-III C-methyltransferase - Brucella ovis (strain ATCC 25840 / 63/290 / NCTC 10512), partial (10%) [TC422328]	ref|XP_006280247,1| hypothetical protein CARUB_v10026161mg [Capsella rubella] gb|EOA13145,1| hypothetical protein CARUB_v10026161mg [Capsella rubella]
A_99_P441142	0.0127836	0.000956597	1.68019	0.748627	1.68019		FGAS018018 Triticum aestivum FGAS: Library 5 GATE 7 Triticum aestivum cDNA, mRNA sequence [CK206425]	dbj|BAJ85757,1| predicted protein [Hordeum vulgare subsp, vulgare] dbj|BAK00957,1| predicted protein [Hordeum vulgare subsp, vulgare]
A_99_P260111	0.0154903	0.00208953	1.69568	0.761862	1.69568		Rep: Uroporphyrin-III C-methyltransferase - Brucella ovis (strain ATCC 25840 / 63/290 / NCTC 10512), partial (10%) [TC422328]	ref|XP_006280247,1| hypothetical protein CARUB_v10026161mg [Capsella rubella] gb|EOA13145,1| hypothetical protein CARUB_v10026161mg [Capsella rubella]
A_99_P160482	0.0316448	0.010522	1.73006	0.790821	1.73006		CJ692289 Y,Ogihara unpublished cDNA library Wh_RDr Triticum aestivum cDNA clone whrd8l02 5', mRNA sequence [CJ692289]	N/A
A_99_P169834	0.00903718	0.000283396	1.76679	0.821133	1.76679			N/A
A_99_P260101	0.0151869	0.00168142	1.77623	0.828822	1.77623			ref|XP_001775577,1| predicted protein [Physcomitrella patens] gb|EDQ59660,1| predicted protein [Physcomitrella patens]
A_99_P291246	0.0181777	0.00314948	1.7967	0.845353	1.7967		Triticum aestivum cDNA, clone: SET5_A20, cultivar: Chinese Spring [AK330684]	gb|EMS52887,1| Lactation elevated protein 1 [Triticum urartu]
A_99_P320146	0.0225474	0.00504448	1.81122	0.856958	1.81122			N/A
A_99_P434437	0.0191137	0.00347262	1.84247	0.881642	1.84247			N/A
A_99_P551552	0.0346291	0.0126347	1.84883	0.886612	1.84883		Rep: White-brown complex homolog protein 23 - Arabidopsis thaliana (Mouse-ear cress), partial (11%) [TC452976]	gb|EMT07325,1| ABC transporter G family member 22 [Aegilops tauschii]
A_99_P051816	0.022932	0.00526214	1.86367	0.89815	1.86367			dbj|BAK01586,1| predicted protein [Hordeum vulgare subsp, vulgare]
A_99_P260096	0.0135424	0.00111224	1.90531	0.930024	1.90531	LOC100286395	Triticum aestivum putative GA receptor GID1 mRNA, partial cds [EU417816]	ref|XP_001777613,1| predicted protein [Physcomitrella patens] gb|EDQ57515,1| predicted protein [Physcomitrella patens]
A_99_P359191	0.0190373	0.00344926	1.90893	0.932767	1.90893		Rep: Expressed protein - Oryza sativa subsp, japonica (Rice), partial (32%) [TC409407]	gb|AAN33000,1| alpha-tubulin 4, partial [Gossypium hirsutum]
A_99_P353481	0.027073	0.00741172	1.91743	0.939172	1.91743		Rep: Chromosome chr1 scaffold_5, whole genome shotgun sequence - Vitis vinifera (Grape), partial (6%) [TC428133]	gb|EMT24155,1| Putative alpha-galactosidase [Aegilops tauschii]
A_99_P227896	0.0127836	0.000941094	1.92756	0.946778	1.92756		Rep: Cytochrome c oxidase subunit 1 - Crangon communis, partial (8%) [TC412464]	gb|EMS59614,1| Transcription factor bHLH47 [Triticum urartu]
A_99_P557142	0.0305874	0.00958651	1.95367	0.966189	1.95367		Triticum aestivum cDNA, clone: WT003_I14, cultivar: Chinese Spring [AK332255]	dbj|BAJ96335,1| predicted protein [Hordeum vulgare subsp, vulgare]
A_99_P536577	0.0370892	0.01416	1.95781	0.969243	1.95781			gb|EMT24173,1| Lipoxygenase 2,1, chloroplastic [Aegilops tauschii]
A_99_P431702	0.0171876	0.00280614	1.97862	0.984496	1.97862		Triticum aestivum cDNA, clone: WT003_I14, cultivar: Chinese Spring [AK332255]	dbj|BAM10432,1| betaine aldehyde dehydrogenase [Leymus chinensis]
A_99_P443942	0.0225474	0.00502073	1.98034	0.985746	1.98034		Rep: EREB - Saccharum arundinaceum, partial (34%) [TC399337]	N/A
A_99_P154392	0.0140372	0.00127865	2.00302	1.00217	2.00302		CJ951738 Y, Ogihara unpublished cDNA library, whchul Triticum aestivum cDNA clone whchul33j05 5', mRNA sequence [CJ951738]	N/A
A_99_P502832	0.0360037	0.013423	2.00809	1.00583	2.00809		TSA: Triticum aestivum cultivar Bobwhite isotig06635,flagleaf mRNA sequence [HP615812]	gb|ABK24048,1| unknown [Picea sitchensis]
A_99_P614957	0.0309593	0.0100086	2.01215	1.00874	2.01215			ref|XP_006851631,1| hypothetical protein AMTR_s00040p00201950 [Amborella trichopoda] gb|ERN13161,1| hypothetical protein AMTR_s00040p00201950 [Amborella trichopoda]
A_99_P153542	0.0212422	0.00428055	2.02032	1.01458	2.02032		CJ907261 Y, Ogihara unpublished cDNA library, whthkles Triticum aestivum cDNA clone whthkles6a02 5', mRNA sequence [CJ907261]	gb|EMT32349,1| Inositol-tetrakisphosphate 1-kinase 1 [Aegilops tauschii]
A_99_P447357	0.0185303	0.00329284	2.02316	1.01661	2.02316		Triticum aestivum cDNA, clone: WT005_J13, cultivar: Chinese Spring [AK333079]	gb|EMT12910,1| Putative inactive receptor kinase [Aegilops tauschii]
A_99_P127825	0.0127836	0.000826585	2.02368	1.01698	2.02368			gb|EMS46422,1| putative L-ascorbate peroxidase 7, chloroplastic [Triticum urartu]
A_99_P013789	0.0491052	0.022145	2.0273	1.01956	2.0273		wre1n,pk0054,a6 wre1n Triticum aestivum cDNA clone wre1n,pk0054,a6 5' end, mRNA sequence [CA642354]	dbj|BAC80000,1| HGWP repeat containing protein-like [Oryza sativa Japonica Group] dbj|BAD31217,1| HGWP repeat containing protein-like [Oryza sativa Japonica Group]
A_99_P339161	0.00961342	0.000339748	2.02854	1.02044	2.02854		Rep: Possible OmpA family member precursor - Rhodopseudomonas palustris, partial (6%) [TC413825]	gb|EMS48624,1| hypothetical protein TRIUR3_24759 [Triticum urartu]
A_99_P265331	0.0248395	0.00611533	2.02962	1.02121	2.02962			emb|CBI24529,3| unnamed protein product [Vitis vinifera]
A_99_P414532	0.0265026	0.00715002	2.03496	1.025	2.03496		TSA: Triticum aestivum cultivar Bobwhite isotig06635,flagleaf mRNA sequence [HP615812]	gb|AFW76050,1| hypothetical protein ZEAMMB73_219043 [Zea mays]
A_99_P227051	0.0303216	0.00938778	2.03497	1.02501	2.03497		Rep: Chromosome undetermined scaffold_30, whole genome shotgun sequence - Vitis vinifera (Grape), partial (34%) [TC427297]	ref|XP_003061866,1| predicted protein [Micromonas pusilla CCMP1545] gb|EEH53578,1| predicted protein [Micromonas pusilla CCMP1545]
A_99_P423827	0.0184804	0.00325638	2.03854	1.02753	2.03854		Rep: Phytepsin precursor (Aspartic proteinase) [Contains: Phytepsin 32 kDa subunit; Phytepsin 29 kDa subunit; Phytepsin 16 kDa subunit; Phytepsin 11 kDa subunit] - Hordeum vulgare (Barley), partial (31%) [TC383795]	ref|XP_002979510,1| hypothetical protein SELMODRAFT_111082 [Selaginella moellendorffii] gb|EFJ19399,1| hypothetical protein SELMODRAFT_111082 [Selaginella moellendorffii]
A_99_P342921	0.0359189	0.0133198	2.04	1.02857	2.04			emb|CAH10204,1| Unknown similar to A,thaliana Hypothetical protein yhjx (F25A4,25) [Triticum aestivum] emb|CAJ15425,1| unnamed protein product [Triticum aestivum]
A_99_P346496	0.0181777	0.00316684	2.04343	1.03099	2.04343		Rep: F-box family protein - Oryza brachyantha, partial (62%) [TC398962]	ref|XP_002882039,1| expressed protein [Arabidopsis lyrata subsp, lyrata] gb|EFH58298,1| expressed protein [Arabidopsis lyrata subsp, lyrata]
A_99_P286566	0.0125509	0.000722134	2.04491	1.03204	2.04491			emb|CAQ58078,1| lipoxygenase [Capsicum annuum]
A_99_P308651	0.0227677	0.00520178	2.04798	1.0342	2.04798		Triticum aestivum cDNA, clone: WT009_I04, cultivar: Chinese Spring [AK334206]	ref|XP_003559135,1| PREDICTED: uncharacterized protein LOC100828030 [Brachypodium distachyon]
A_99_P515342	0.0302265	0.00932761	2.04832	1.03444	2.04832			ref|XP_007135251,1| hypothetical protein PHAVU_010G113500g [Phaseolus vulgaris] gb|ESW07245,1| hypothetical protein PHAVU_010G113500g [Phaseolus vulgaris]
A_99_P204816	0.0435238	0.0180681	2.05236	1.03728	2.05236			ref|XP_007513576,1| predicted protein [Bathycoccus prasinos] emb|CCO16101,1| predicted protein [Bathycoccus prasinos]
A_99_P467622	0.0125509	0.000733406	2.05441	1.03872	2.05441			gb|EMT13258,1| Protein TRANSPARENT TESTA 12 [Aegilops tauschii]
A_99_P450947	0.0166121	0.00256511	2.05819	1.04138	2.05819			dbj|BAK01637,1| predicted protein [Hordeum vulgare subsp, vulgare]
A_99_P544937	0.00880151	0.000194542	2.05958	1.04235	2.05958		Rep: Os03g0299600 protein - Oryza sativa subsp, japonica (Rice), partial (34%) [TC450354]	N/A
A_99_P464952	0.0217166	0.00451844	2.06023	1.04281	2.06023		Rep: Phytosulfokine-alpha 1 precursor - Triticum aestivum (Wheat), partial (42%) [TC413606]	ref|NP_195871,1| uncharacterized protein [Arabidopsis thaliana] emb|CAB85988,1| putative protein [Arabidopsis thaliana] gb|AED90483,1| uncharacterized protein AT5G02510 [Arabidopsis thaliana]
A_99_P221386	0.0304532	0.00947399	2.06802	1.04825	2.06802		Rep: Aldehyde oxidase-2 - Zea mays (Maize), partial (18%) [TC385025]	ref|XP_007207414,1| hypothetical protein PRUPE_ppa014644mg [Prunus persica] gb|EMJ08613,1| hypothetical protein PRUPE_ppa014644mg [Prunus persica]
A_99_P226236	0.0222379	0.00485936	2.07189	1.05095	2.07189			gb|EMT25743,1| Aspartate aminotransferase, cytoplasmic [Aegilops tauschii]
A_99_P327226	0.0218407	0.00458775	2.07579	1.05366	2.07579		Triticum aestivum cDNA, clone: WT004_A11, cultivar: Chinese Spring [AK332455]	gb|EMT17209,1| Sugar phosphate exchanger 2 [Aegilops tauschii]
A_99_P264751	0.0292707	0.00869474	2.08021	1.05673	2.08021		TSA: Triticum aestivum cultivar Bobwhite isotig06640,flagleaf mRNA sequence [HP615817]	ref|XP_006838238,1| hypothetical protein AMTR_s00103p00027130 [Amborella trichopoda] gb|ERN00807,1| hypothetical protein AMTR_s00103p00027130 [Amborella trichopoda]
A_99_P201946	0.0453106	0.0191256	2.08845	1.06243	2.08845			gb|EMS63820,1| hypothetical protein TRIUR3_31707 [Triticum urartu]
A_99_P305876	0.0431989	0.0178902	2.09911	1.06978	2.09911		Rep: Os09g0454600 protein - Oryza sativa subsp, japonica (Rice), partial (29%) [TC405786]	gb|EMS54274,1| hypothetical protein TRIUR3_16873 [Triticum urartu]
A_99_P521867	0.0240464	0.0058171	2.10682	1.07507	2.10682		Rep: Expressed protein - Oryza sativa subsp, japonica (Rice), partial (36%) [TC429898]	gb|EYU22863,1| hypothetical protein MIMGU_mgv1a023262mg [Mimulus guttatus]
A_99_P454767	0.0164557	0.00239359	2.11083	1.07781	2.11083			gb|EXC06808,1| Putative mediator of RNA polymerase II transcription subunit 12 [Morus notabilis]
A_99_P240736	0.0309593	0.0100283	2.1171	1.08209	2.1171	Wcor410b	Triticum aestivum cold acclimation protein WCOR410b (Wcor410b) mRNA, complete cds [U73210]	emb|CAI65404,1| dehydrin [Triticum turgidum subsp, durum]
A_99_P566337	0.0370201	0.0140732	2.12253	1.08578	2.12253		TSA: Triticum aestivum contig17591,TraeRec mRNA sequence [JP222311]	gb|AFW56312,1| hypothetical protein ZEAMMB73_371904, partial [Zea mays]
A_99_P203486	0.0264608	0.00712557	2.14559	1.10137	2.14559		Rep: Aspartic proteinase - Triticum aestivum (Wheat), partial (60%) [TC394105]	N/A
A_99_P210296	0.0347034	0.0126791	2.14617	1.10176	2.14617		Rep: Chromosome chr8 scaffold_34, whole genome shotgun sequence - Vitis vinifera (Grape), partial (57%) [TC394857]	dbj|BAJ94631,1| predicted protein [Hordeum vulgare subsp, vulgare]
A_99_P510242	0.0462788	0.0198568	2.15137	1.10526	2.15137		Rep: Pyrroline-5-carboxylate reductase - Triticum aestivum (Wheat), partial (33%) [TC436197]	gb|EMT07140,1| Pyrroline-5-carboxylate reductase [Aegilops tauschii]
A_99_P199641	0.0111988	0.000452833	2.15269	1.10614	2.15269			dbj|BAJ85118,1| predicted protein [Hordeum vulgare subsp, vulgare]
A_99_P276146	0.0407769	0.0164001	2.16057	1.11141	2.16057		Rep: Phytosulfokine-alpha 1 precursor - Triticum aestivum (Wheat), partial (83%) [TC392022]	gb|EMS53687,1| Phytosulfokines 5 [Triticum urartu]
A_99_P520617	0.0457906	0.0194878	2.16173	1.11219	2.16173		Rep: Cytochrome c oxidase, cbb3-type, subunit III - Oceanicola batsensis HTCC2597, partial (5%) [TC441516]	gb|AAX94964,1| transposon protein, putative, unclassified [Oryza sativa Japonica Group] gb|ABA92675,1| transposon protein, putative, unclassified [Oryza sativa Japonica Group]
A_99_P194253	0.0437334	0.0182014	2.16295	1.113	2.16295		Rep: Predicted protein - Physcomitrella patens subsp, patens, partial (4%) [TC440481]	gb|EMS63712,1| putative urea active transporter 1 [Triticum urartu]
A_99_P431857	0.0147084	0.00137158	2.16302	1.11305	2.16302		Rep: Chromosome undetermined scaffold_222, whole genome shotgun sequence - Vitis vinifera (Grape), partial (28%) [TC390010]	ref|XP_007214877,1| hypothetical protein PRUPE_ppa026885mg, partial [Prunus persica] gb|EMJ16076,1| hypothetical protein PRUPE_ppa026885mg, partial [Prunus persica]
A_99_P256571	0.0294269	0.00886176	2.16607	1.11508	2.16607		Rep: Chromosome chr8 scaffold_41, whole genome shotgun sequence - Vitis vinifera (Grape), partial (26%) [TC371529]	gb|EMS65761,1| ABC transporter G family member 22 [Triticum urartu]
A_99_P211461	0.0415371	0.0169126	2.17271	1.1195	2.17271		Rep: Chromosome chr1 scaffold_166, whole genome shotgun sequence - Vitis vinifera (Grape), partial (58%) [TC388900]	dbj|BAK03413,1| predicted protein [Hordeum vulgare subsp, vulgare] dbj|BAJ93218,1| predicted protein [Hordeum vulgare subsp, vulgare]
A_99_P202811	0.0221812	0.00481152	2.17827	1.12318	2.17827			gb|EMS60451,1| hypothetical protein TRIUR3_04515 [Triticum urartu]
A_99_P211106	0.0189109	0.0034117	2.17873	1.12349	2.17873			ref|XP_005849966,1| hypothetical protein CHLNCDRAFT_17375, partial [Chlorella variabilis] gb|EFN57864,1| hypothetical protein CHLNCDRAFT_17375, partial [Chlorella variabilis]
A_99_P176379	0.0267396	0.00726119	2.18046	1.12463	2.18046		TSA: Triticum aestivum cultivar Bobwhite isotig05310,flagleaf mRNA sequence [HP614479]	gb|EMS53863,1| putative mitochondrial chaperone BCS1-B [Triticum urartu]
A_99_P504692	0.033391	0.0116223	2.18565	1.12806	2.18565			gb|EMT33660,1| 2-succinylbenzoate--CoA ligase [Aegilops tauschii]
A_99_P313986	0.0473732	0.0207737	2.19267	1.13269	2.19267			gb|ADN34175,1| hypothetical protein [Cucumis melo subsp, melo]
A_99_P532277	0.0483067	0.0213331	2.20442	1.1404	2.20442			emb|CAD33257,1| alternative oxidase [Crocus sativus]
A_99_P431127	0.0341306	0.012095	2.21314	1.1461	2.21314			ref|XP_003078257,1| Calnexin (ISS) [Ostreococcus tauri] emb|CAL52997,1| Calnexin (ISS) [Ostreococcus tauri]
A_99_P227366	0.0154903	0.00177835	2.21322	1.14615	2.21322		Rep: Chitinase III-like protein - Oryza sativa subsp, japonica (Rice), partial (95%) [TC371648]	gb|EMT30400,1| hypothetical protein F775_27208 [Aegilops tauschii]
A_99_P295356	0.0127836	0.000870987	2.21439	1.14691	2.21439			ref|XP_007214877,1| hypothetical protein PRUPE_ppa026885mg, partial [Prunus persica] gb|EMJ16076,1| hypothetical protein PRUPE_ppa026885mg, partial [Prunus persica]
A_99_P249276	0.0220704	0.00471919	2.21696	1.14858	2.21696			ref|NP_001046117,2| Os02g0185900 [Oryza sativa Japonica Group] dbj|BAF08031,2| Os02g0185900, partial [Oryza sativa Japonica Group]
A_99_P444907	0.0154903	0.00207812	2.21763	1.14902	2.21763		Rep: Nuclear ribonuclease Z - Arabidopsis thaliana (Mouse-ear cress), partial (46%) [TC400080]	gb|EMS61729,1| hypothetical protein TRIUR3_20565 [Triticum urartu]
A_99_P205981	0.0426749	0.0175883	2.23495	1.16024	2.23495		TSA: Triticum aestivum contig17591,TraeRec mRNA sequence [JP222311]	emb|CAN81262,1| hypothetical protein VITISV_019711 [Vitis vinifera]
A_99_P342431	0.0309593	0.00989599	2.23935	1.16308	2.23935		Rep: Chromosome chr18 scaffold_1, whole genome shotgun sequence - Vitis vinifera (Grape), partial (22%) [TC426105]	gb|EMT03626,1| hypothetical protein F775_30132 [Aegilops tauschii]
A_99_P325881	0.0103115	0.00036955	2.2523	1.1714	2.2523		TSA: Triticum aestivum contig31250,TraeRec mRNA sequence [JP234453]	gb|EMS60544,1| ABC transporter C family member 9 [Triticum urartu]
A_99_P239011	0.0428224	0.0177056	2.25404	1.17251	2.25404			emb|CAH69199,1| type 1 non specific lipid transfer protein precursor [Triticum aestivum] emb|CAH69212,1| type 1 non specific lipid transfer protein precursor [Triticum aestivum] gb|EMT27040,1| Non-specific lipid-transfer protein 3 [Aegilops tauschii]
A_99_P505872	0.0162527	0.00226261	2.2589	1.17562	2.2589		Rep: Glutathione transferase - Triticum aestivum (Wheat), complete [TC434300]	emb|CAC94005,1| glutathione transferase [Triticum aestivum] gb|EMT19277,1| hypothetical protein F775_26875 [Aegilops tauschii]
A_99_P363021	0.0135537	0.00115664	2.26136	1.17719	2.26136		Triticum aestivum cDNA, clone: SET6_I14, cultivar: Chinese Spring [AK331168]	gb|EEC75227,1| hypothetical protein OsI_11496 [Oryza sativa Indica Group]
A_99_P277716	0.0268452	0.00733598	2.26372	1.17869	2.26372		TSA: Triticum aestivum cultivar Bobwhite isotig05310,flagleaf mRNA sequence [HP614479]	gb|EMT08093,1| Putative mitochondrial chaperone BCS1-B [Aegilops tauschii]
A_99_P469052	0.0168988	0.00274216	2.26751	1.18111	2.26751		Triticum aestivum cDNA, clone: WT004_G13, cultivar: Chinese Spring [AK332605]	gb|EMS63034,1| Formate dehydrogenase, mitochondrial [Triticum urartu]
A_99_P556462	0.0398035	0.0156123	2.29113	1.19606	2.29113		TSA: Triticum aestivum cultivar Bobwhite isotig02334,flagleaf mRNA sequence [HP611478]	gb|EMS63772,1| hypothetical protein TRIUR3_00247 [Triticum urartu]
A_99_P226261	0.0154903	0.00193759	2.29291	1.19718	2.29291		Rep: Formate dehydrogenase, mitochondrial precursor - Hordeum vulgare (Barley), complete [TC379352]	gb|EMS63034,1| Formate dehydrogenase, mitochondrial [Triticum urartu]
A_99_P431532	0.0343447	0.0122574	2.30244	1.20317	2.30244		Rep: CBL-interacting protein kinase - Hordeum brevisubulatum, partial (63%) [TC389753]	emb|CAN61570,1| hypothetical protein VITISV_037260 [Vitis vinifera]
A_99_P063617	0.0125509	0.000755383	2.30334	1.20372	2.30334		Rep: Chromosome chr4 scaffold_6, whole genome shotgun sequence - Vitis vinifera (Grape), partial (86%) [TC401225]	ref|XP_006843868,1| hypothetical protein AMTR_s00007p00264970 [Amborella trichopoda] gb|ERN05543,1| hypothetical protein AMTR_s00007p00264970 [Amborella trichopoda]
A_99_P449692	0.021735	0.0045439	2.3089	1.20721	2.3089		Rep: 17,4 kDa class I heat shock protein 3 - Oryza sativa subsp, japonica (Rice), partial (94%) [TC403468]	gb|AAB59350,1| heat shock protein 16,9, partial [Triticum aestivum]
A_99_P355211	0.0309593	0.0099333	2.32677	1.21833	2.32677			gb|EMS64170,1| hypothetical protein TRIUR3_01996 [Triticum urartu]
A_99_P470082	0.0309373	0.00977858	2.32949	1.22001	2.32949		Rep: Os01g0266400 protein - Oryza sativa subsp, japonica (Rice), partial (31%) [TC416614]	gb|EMS48634,1| hypothetical protein TRIUR3_18743 [Triticum urartu]
A_99_P206341	0.0309867	0.0100762	2.33203	1.22159	2.33203		TSA: Triticum aestivum contig17591,TraeRec mRNA sequence [JP222311]	ref|XP_002533721,1| purine permease, putative [Ricinus communis] gb|EEF28666,1| purine permease, putative [Ricinus communis]
A_99_P428397	0.021645	0.00446975	2.33541	1.22368	2.33541			ref|XP_006659498,1| PREDICTED: patatin-T5-like [Oryza brachyantha]
A_99_P537337	0.0473732	0.0207672	2.36983	1.24478	2.36983		WHE1213_E01_I01ZS Wheat etiolated seedling root cDNA library Triticum aestivum cDNA clone WHE1213_E01_I01, mRNA sequence [BE405360]	dbj|BAJ97919,1| predicted protein [Hordeum vulgare subsp, vulgare]
A_99_P487262	0.0221812	0.00478782	2.37593	1.24849	2.37593		TSA: Triticum aestivum cultivar Bobwhite isotig02334,flagleaf mRNA sequence [HP611478]	gb|EMS63772,1| hypothetical protein TRIUR3_00247 [Triticum urartu]
A_99_P072760	0.0344633	0.0124588	2.38718	1.25531	2.38718		AZO2,108O11F001113 AZO2 Triticum aestivum cDNA clone AZO2108O11, mRNA sequence [CD868449]	ref|NP_001132513,1| uncharacterized protein LOC100193973 [Zea mays] gb|ACF81381,1| unknown [Zea mays]
A_99_P303311	0.0210738	0.00422734	2.39632	1.26082	2.39632		Rep: Chromosome undetermined scaffold_484, whole genome shotgun sequence - Vitis vinifera (Grape), partial (94%) [TC396551]	gb|EMS50048,1| hypothetical protein TRIUR3_19360 [Triticum urartu]
A_99_P504797	0.00880151	0.000121179	2.40225	1.26439	2.40225			gb|EMT22452,1| Protein TRANSPARENT TESTA 12 [Aegilops tauschii]
A_99_P168849	0.0258275	0.00672363	2.42427	1.27755	2.42427	Waox1c	Triticum aestivum cDNA, clone: WT004_F10, cultivar: Chinese Spring [AK332579]	ref|XP_003593412,1| Serine/threonine protein kinase [Medicago truncatula] gb|AES63663,1| Serine/threonine protein kinase [Medicago truncatula]
A_99_P202701	0.0331309	0.0114429	2.42978	1.28083	2.42978			gb|AAP54035,1| hypothetical protein LOC_Os10g31280 [Oryza sativa Japonica Group]
A_99_P538012	0.029455	0.00888488	2.43363	1.28311	2.43363			ref|XP_006485875,1| PREDICTED: MLO-like protein 12-like [Citrus sinensis]
A_99_P255246	0.0125509	0.000714006	2.43733	1.2853	2.43733		Rep: Os01g0559700 protein - Oryza sativa subsp, japonica (Rice), partial (46%) [TC445266]	N/A
A_99_P001246	0.0147084	0.00137639	2.44793	1.29156	2.44793		Rep: Pyrroline-5-carboxylate reductase - Triticum aestivum (Wheat), partial (33%) [TC436197]	gb|AAO32084,1| pyrroline-5-carboxylate reductase [Hordeum vulgare subsp, vulgare]
A_99_P311296	0.0127836	0.00090293	2.4513	1.29355	2.4513		Rep: Os04g0679800 protein - Oryza sativa subsp, japonica (Rice), partial (98%) [TC458073]	ref|XP_004967579,1| PREDICTED: kinetochore protein NDC80 homolog isoform X1 [Setaria italica]
A_99_P017504	0.0403722	0.0159962	2.46291	1.30037	2.46291		WHE4114_B08_C16ZS Wheat salt-stressed root cDNA library Triticum aestivum cDNA clone WHE4114_B08_C16, mRNA sequence [BQ744317]	dbj|BAJ95925,1| predicted protein [Hordeum vulgare subsp, vulgare]
A_99_P257106	0.0154903	0.00206094	2.46708	1.30281	2.46708		TSA: Triticum aestivum cultivar Bobwhite isotig11576,flagleaf mRNA sequence [HP620785]	ref|XP_004301440,1| PREDICTED: putative ribonuclease H protein At1g65750-like [Fragaria vesca subsp, vesca]
A_99_P506377	0.0293908	0.0088208	2.47451	1.30714	2.47451		Rep: Aldose reductase - Zea mays (Maize), partial (64%) [TC434517]	ref|XP_004498652,1| PREDICTED: potassium channel AKT1-like isoform X2 [Cicer arietinum]
A_99_P424127	0.0473732	0.0207744	2.47591	1.30796	2.47591		Rep: Ferritin - Triticum monococcum (Einkorn wheat) (Small spelt), partial (93%) [TC384023]	ref|NP_001175444,1| Os08g0224000 [Oryza sativa Japonica Group] dbj|BAH94172,1| Os08g0224000 [Oryza sativa Japonica Group]
A_99_P487237	0.0373547	0.0142799	2.49059	1.31649	2.49059		Rep: Chromosome chr5 scaffold_64, whole genome shotgun sequence - Vitis vinifera (Grape), partial (14%) [TC425843]	gb|EMT04496,1| Cysteine-rich receptor-like protein kinase 42 [Aegilops tauschii]
A_99_P207896	0.0437432	0.0182463	2.49541	1.31928	2.49541		Rep: Pathogen-related protein - Oryza sativa (Rice), partial (98%) [TC384677]	ref|XP_002881030,1| hypothetical protein ARALYDRAFT_481829 [Arabidopsis lyrata subsp, lyrata] gb|EFH57289,1| hypothetical protein ARALYDRAFT_481829 [Arabidopsis lyrata subsp, lyrata]
A_99_P309536	0.0113247	0.000505167	2.51009	1.32774	2.51009			emb|CAC82185,1| ornithine aminotransferase [Medicago truncatula]
A_99_P198271	0.0421227	0.0172659	2.51391	1.32993	2.51391		TSA: Triticum aestivum cultivar Bobwhite isotig27582,flagleaf mRNA sequence [HP636787]	gb|EMS54742,1| CBL-interacting protein kinase 2 [Triticum urartu]
A_99_P388397	0.00653832	5.53267e-05	2.53076	1.33957	2.53076		Rep: Os04g0679800 protein - Oryza sativa subsp, japonica (Rice), partial (77%) [TC389102]	gb|ABD83295,1| Fgenesh protein 81 [Beta vulgaris]
A_99_P093750	0.0220704	0.00472387	2.53892	1.34422	2.53892		FGAS083158 Triticum aestivum FGAS: Library 6 CAP GATE 1 Triticum aestivum cDNA, mRNA sequence [DR737941]	gb|EMS65382,1| hypothetical protein TRIUR3_05744 [Triticum urartu]
A_99_P012624	0.022347	0.00491656	2.54526	1.34781	2.54526		FGAS018583 Triticum aestivum FGAS: Library 5 GATE 7 Triticum aestivum cDNA, mRNA sequence [CK206970]	gb|EMT11637,1| Putative DNA-binding protein ESCAROLA [Aegilops tauschii]
A_99_P257111	0.0166041	0.00246292	2.54867	1.34974	2.54867		TSA: Triticum aestivum cultivar Bobwhite isotig11576,flagleaf mRNA sequence [HP620785]	emb|CAN74665,1| hypothetical protein VITISV_043029 [Vitis vinifera]
A_99_P303306	0.0250058	0.00631057	2.54922	1.35006	2.54922		Rep: Chromosome undetermined scaffold_484, whole genome shotgun sequence - Vitis vinifera (Grape), partial (94%) [TC396551]	N/A
A_99_P196726	0.0220578	0.00466379	2.55066	1.35087	2.55066		Rep: Aspartic proteinase - Triticum aestivum (Wheat), partial (60%) [TC394105]	ref|XP_007204781,1| hypothetical protein PRUPE_ppa015817mg, partial [Prunus persica] gb|EMJ05980,1| hypothetical protein PRUPE_ppa015817mg, partial [Prunus persica]
A_99_P252111	0.0319024	0.0107227	2.56085	1.35662	2.56085			ref|NP_001234258,1| potassium channel [Solanum lycopersicum] emb|CAA65254,1| potassium channel [Solanum lycopersicum]
A_99_P292716	0.0127836	0.000836902	2.58085	1.36784	2.58085			gb|EMS52241,1| Peroxidase 12 [Triticum urartu]
A_99_P311111	0.0309593	0.00998028	2.58198	1.36848	2.58198			emb|CAI93180,1| glycosyltransferase [Triticum aestivum]
A_99_P220451	0.0154903	0.00190495	2.59415	1.37526	2.59415			ref|XP_006388440,1| hypothetical protein POPTR_0185s002001g, partial [Populus trichocarpa] gb|ERP47354,1| hypothetical protein POPTR_0185s002001g, partial [Populus trichocarpa]
A_99_P396362	0.0202316	0.00393755	2.64838	1.40511	2.64838			ref|XP_007038558,1| Uncharacterized protein TCM_015067 [Theobroma cacao] gb|EOY23059,1| Uncharacterized protein TCM_015067 [Theobroma cacao]
A_99_P218666	0.0248395	0.00617377	2.65786	1.41027	2.65786			ref|XP_004138675,1| PREDICTED: pre-mRNA-processing ATP-dependent RNA helicase prp5-like [Cucumis sativus] ref|XP_004165882,1| PREDICTED: pre-mRNA-processing ATP-dependent RNA helicase prp5-like [Cucumis sativus]
A_99_P389527	0.00523595	2.34477e-05	2.6697	1.41668	2.6697			gb|EMS63610,1| ABSCISIC ACID-INSENSITIVE 5-like protein 5 [Triticum urartu]
A_99_P325311	0.0414377	0.0168161	2.67437	1.4192	2.67437			gb|EMT01021,1| hypothetical protein F775_16953 [Aegilops tauschii]
A_99_P322201	0.0362953	0.0136033	2.71912	1.44314	2.71912		TSA: Triticum aestivum cultivar Bobwhite isotig28763,flagleaf mRNA sequence [HP637968]	gb|EMT12556,1| Putative serine/threonine-protein kinase NAK [Aegilops tauschii]
A_99_P305341	0.0127836	0.000915174	2.72346	1.44544	2.72346			dbj|BAJ97341,1| predicted protein [Hordeum vulgare subsp, vulgare]
A_99_P255771	0.0344633	0.0125399	2.72559	1.44657	2.72559			N/A
A_99_P242531	0.0240323	0.0057958	2.7327	1.45033	2.7327			gb|EMS45331,1| hypothetical protein TRIUR3_29962 [Triticum urartu]
A_99_P094130	0.0341306	0.0120774	2.75413	1.46159	2.75413	a1	Triticum aestivum mRNA for glycosyltransferase (a1 gene) [AJ867392]	ref|XP_002518201,1| conserved hypothetical protein [Ricinus communis] gb|EEF44334,1| conserved hypothetical protein [Ricinus communis]
A_99_P242556	0.0213423	0.0043697	2.75898	1.46414	2.75898		Rep: Chromosome chr1 scaffold_75, whole genome shotgun sequence - Vitis vinifera (Grape), partial (82%) [TC393315]	gb|AEW46826,1| gamma prolamin, partial [Hordeum brachyantherum subsp, brachyantherum]
A_99_P485072	0.0208015	0.00414167	2.76285	1.46616	2.76285		Rep: Ferritin - Triticum aestivum (Wheat), partial (46%) [TC424752]	gb|AFK48671,1| unknown [Lotus japonicus]
A_99_P269526	0.0165063	0.0024402	2.78799	1.47923	2.78799		Rep: DT-related protein - Oryza sativa subsp, japonica (Rice), complete [TC371176]	ref|XP_006643927,1| PREDICTED: V-type proton ATPase subunit E-like [Oryza brachyantha]
A_99_P228476	0.0343522	0.0123455	2.79441	1.48254	2.79441	gstu3	FGAS022697 Triticum aestivum FGAS: Library 5 GATE 7 Triticum aestivum cDNA, mRNA sequence [CK210870]	gb|EMT08212,1| hypothetical protein F775_27020 [Aegilops tauschii]
A_99_P203771	0.0305874	0.00958515	2.80296	1.48695	2.80296		Rep: Ornithine--oxo-acid aminotransferase - Saccharum officinarum (Sugarcane), partial (44%) [TC376717]	gb|EMS55823,1| putative ornithine aminotransferase [Triticum urartu]
A_99_P497832	0.0198594	0.00368713	2.81659	1.49395	2.81659			ref|XP_003523134,1| PREDICTED: uncharacterized protein LOC100775818 [Glycine max]
A_99_P409937	0.0320356	0.0108274	2.82576	1.49864	2.82576		TSA: Triticum aestivum cultivar Bobwhite isotig21133,flagleaf mRNA sequence [HP630364]	ref|XP_003516395,1| PREDICTED: probable inactive leucine-rich repeat receptor-like protein kinase At1g66830-like [Glycine max]
A_99_P437312	0.0202316	0.00392986	2.83268	1.50217	2.83268			gb|EMS65013,1| Anthocyanin 3'-O-beta-glucosyltransferase [Triticum urartu]
A_99_P421412	0.0176325	0.00293643	2.84282	1.50732	2.84282			gb|EMT08212,1| hypothetical protein F775_27020 [Aegilops tauschii]
A_99_P514917	0.0154903	0.00183292	2.84409	1.50797	2.84409		Rep: Chromosome chr5 scaffold_64, whole genome shotgun sequence - Vitis vinifera (Grape), partial (30%) [TC438560]	gb|EMS52195,1| Cysteine-rich receptor-like protein kinase 42 [Triticum urartu]
A_99_P260256	0.0149343	0.00143471	2.8443	1.50807	2.8443		Rep: Os05g0595300 protein - Oryza sativa subsp, japonica (Rice), partial (19%) [TC399273]	gb|AEA38296,1| NADH dehydrogenase subunit F [Cratoxylum formosum]
A_99_P423137	0.0127953	0.000999932	2.86034	1.51618	2.86034			gb|EMT08212,1| hypothetical protein F775_27020 [Aegilops tauschii]
A_99_P238991	0.0417774	0.0170936	2.86135	1.5167	2.86135			sp|Q43766,1|NLTP3_HORVU RecName: Full=Non-specific lipid-transfer protein 3; Short=LTP 3; AltName: Full=CW-19; AltName: Full=CW-20; Short=CW20; Flags: Precursor emb|CAA48623,1| Cw-19 peptide,non specific lipid transfer protein [Hordeum vulgare subsp, vulgare]
A_99_P505632	0.0319024	0.0106648	2.86502	1.51855	2.86502		Rep: Pollen oleosin - Lilium longiflorum (Trumpet lily), partial (40%) [TC385078]	ref|NP_001056403,1| Os05g0576700 [Oryza sativa Japonica Group] gb|AAT39147,1| unknown protein [Oryza sativa Japonica Group] dbj|BAF18317,1| Os05g0576700 [Oryza sativa Japonica Group] gb|EAY99143,1| hypothetical protein OsI_21102 [Oryza sativa Indica Group] dbj|BAG88788,1| unnamed protein product [Oryza sativa Japonica Group] dbj|BAG98388,1| unnamed protein product [Oryza sativa Japonica Group]
A_99_P497837	0.0355598	0.0130628	2.86824	1.52017	2.86824			ref|XP_001702930,1| predicted protein [Chlamydomonas reinhardtii] gb|EDO96783,1| predicted protein [Chlamydomonas reinhardtii]
A_99_P446632	0.029678	0.00905164	2.87269	1.5224	2.87269			gb|EMS54288,1| Uncharacterized transporter C5D6,04 [Triticum urartu]
A_99_P167534	0.0310037	0.0101082	2.87549	1.52381	2.87549			gb|EMS53888,1| Pyruvate dehydrogenase E1 component subunit alpha-2, mitochondrial [Triticum urartu]
A_99_P167489	0.0111988	0.000473313	2.89221	1.53217	2.89221			gb|EMS63610,1| ABSCISIC ACID-INSENSITIVE 5-like protein 5 [Triticum urartu]
A_99_P533467	0.0406414	0.0163253	2.89274	1.53244	2.89274		Rep: Serine/arginine repetitive matrix 1 - Danio rerio (Zebrafish) (Brachydanio rerio), partial (4%) [TC445970]	gb|EMT07122,1| hypothetical protein F775_10211 [Aegilops tauschii]
A_99_P466642	0.0164557	0.00236054	2.89377	1.53295	2.89377		TSA: Triticum aestivum cultivar Bobwhite isotig02334,flagleaf mRNA sequence [HP611478]	gb|EMS63772,1| hypothetical protein TRIUR3_00247 [Triticum urartu]
A_99_P505547	0.0252088	0.00642225	2.89636	1.53424	2.89636		Rep: Chromosome chr16 scaffold_10, whole genome shotgun sequence - Vitis vinifera (Grape), partial (48%) [TC434140]	ref|XP_003077978,1| unnamed protein product [Ostreococcus tauri] emb|CAL52718,1| unnamed protein product [Ostreococcus tauri]
A_99_P531167	0.0216637	0.00448586	2.90014	1.53612	2.90014		Rep: NADPH:quinone oxidoreductase - Arabidopsis thaliana (Mouse-ear cress), partial (52%) [TC421143]	ref|XP_002522002,1| metalloprotease m41 ftsh, putative [Ricinus communis] gb|EEF40406,1| metalloprotease m41 ftsh, putative [Ricinus communis]
A_99_P304216	0.0212422	0.0042829	2.90105	1.53658	2.90105			ref|XP_001783766,1| predicted protein [Physcomitrella patens] gb|EDQ51418,1| predicted protein [Physcomitrella patens]
A_99_P260276	0.0127836	0.000971353	2.9084	1.54023	2.9084		Rep: Os05g0595300 protein - Oryza sativa subsp, japonica (Rice), partial (21%) [TC443262]	gb|AEA38296,1| NADH dehydrogenase subunit F [Cratoxylum formosum]
A_99_P473602	0.0154903	0.00205552	2.9111	1.54157	2.9111		Rep: NADPH:quinone oxidoreductase - Arabidopsis thaliana (Mouse-ear cress), partial (26%) [TC418644]	gb|EMT08688,1| hypothetical protein F775_21930 [Aegilops tauschii]
A_99_P535442	0.0454754	0.0192857	2.91286	1.54244	2.91286		Rep: Saccharopin dehydrogenase-like protein - Hordeum vulgare var, distichum (Two-rowed barley), partial (24%) [TC446724]	emb|CAD48130,1| saccharopin dehydrogenase-like protein [Hordeum vulgare subsp, vulgare]
A_99_P275306	0.0343522	0.0123821	2.92092	1.54642	2.92092		TSA: Triticum aestivum cultivar Bobwhite isotig02339,flagleaf mRNA sequence [HP611483]	gb|EMS63772,1| hypothetical protein TRIUR3_00247 [Triticum urartu]
A_99_P202636	0.0144587	0.00132424	2.9476	1.55954	2.9476		Rep: HvPIP2;1 protein - Hordeum vulgare (Barley), partial (39%) [TC389464]	gb|EAZ23886,1| hypothetical protein OsJ_07605 [Oryza sativa Japonica Group]
A_99_P412202	0.0252088	0.0064113	2.95413	1.56273	2.95413		FGAS014700 Triticum aestivum FGAS: Library 4 Gate 8 Triticum aestivum cDNA, mRNA sequence [CK162115]	N/A
A_99_P287256	0.0154903	0.00187908	2.9704	1.57066	2.9704		Rep: Predicted protein - Physcomitrella patens subsp, patens, partial (72%) [TC397960]	ref|XP_007210720,1| hypothetical protein PRUPE_ppa022610mg [Prunus persica] gb|EMJ11919,1| hypothetical protein PRUPE_ppa022610mg [Prunus persica]
A_99_P537307	0.00523595	9.20729e-06	2.97198	1.57142	2.97198		Rep: Os04g0679800 protein - Oryza sativa subsp, japonica (Rice), partial (97%) [TC390586]	gb|EMT30862,1| RING finger protein 141 [Aegilops tauschii]
A_99_P370327	0.0362953	0.0135682	2.99234	1.58128	2.99234			gb|EMT25706,1| hypothetical protein F775_31579 [Aegilops tauschii]
A_99_P444237	0.0313523	0.0103467	3.01203	1.59074	3.01203		Rep: Chromosome chr1 scaffold_136, whole genome shotgun sequence - Vitis vinifera (Grape), partial (97%) [TC399532]	gb|EMS45275,1| hypothetical protein TRIUR3_20548 [Triticum urartu]
A_99_P301436	0.0124036	0.000681654	3.01642	1.59284	3.01642		Rep: Acid phosphatase - Oryza sativa subsp, japonica (Rice), partial (20%) [TC422747]	gb|ACO83273,1| SRK [Capsella rubella] gb|ACO83274,1| SRK [Capsella rubella] gb|ACO83275,1| SRK [Capsella rubella] gb|ACO83276,1| SRK [Capsella rubella] gb|ACO83277,1| SRK [Capsella rubella]
A_99_P400397	0.00880151	0.000141215	3.0247	1.59679	3.0247		Rep: ABA responsive element binding factor 2 - Hordeum vulgare var, distichum (Two-rowed barley), partial (34%) [TC397949]	ref|XP_007215358,1| hypothetical protein PRUPE_ppa005543mg [Prunus persica] gb|EMJ16557,1| hypothetical protein PRUPE_ppa005543mg [Prunus persica]
A_99_P000412	0.0127836	0.000980824	3.0326	1.60056	3.0326	Waox1a	Triticum aestivum mRNA for alternative oxidase, complete cds [AB078882]	ref|NP_001167940,1| uncharacterized protein LOC100381654 [Zea mays] gb|ACN26586,1| unknown [Zea mays]
A_99_P365426	0.0213152	0.00435005	3.03571	1.60204	3.03571			gb|AFK38362,1| unknown [Lotus japonicus]
A_99_P646031	0.0164557	0.00239501	3.04663	1.60721	3.04663	LOC100037568	Triticum aestivum fasciclin-like protein FLA5 mRNA, complete cds [DQ872378]	ref|XP_006370341,1| hypothetical protein POPTR_0001s41810g [Populus trichocarpa] gb|ERP66910,1| hypothetical protein POPTR_0001s41810g [Populus trichocarpa]
A_99_P200501	0.0127836	0.000992657	3.05886	1.61299	3.05886			gb|EMS52674,1| hypothetical protein TRIUR3_25203 [Triticum urartu]
A_99_P152607	0.0154903	0.00197081	3.09039	1.62779	3.09039		CJ858389 Y, Ogihara unpublished cDNA library, whsctal Triticum aestivum cDNA clone whsctal4f18 5', mRNA sequence [CJ858389]	ref|XP_002533426,1| kinase, putative [Ricinus communis] gb|EEF28957,1| kinase, putative [Ricinus communis]
A_99_P000836	0.0144978	0.00133504	3.09995	1.63225	3.09995		WHE2101_F12_K23ZS Wheat salt-stressed crown cDNA library Triticum aestivum cDNA clone WHE2101_F12_K23, mRNA sequence [BF474922]	dbj|BAK06262,1| predicted protein [Hordeum vulgare subsp, vulgare] dbj|BAK06684,1| predicted protein [Hordeum vulgare subsp, vulgare] dbj|BAJ97564,1| predicted protein [Hordeum vulgare subsp, vulgare] dbj|BAJ93768,1| predicted protein [Hordeum vulgare subsp, vulgare]
A_99_P175879	0.0120927	0.000615379	3.101	1.63273	3.101	LOC543445	Triticum aestivum glutathione-S-transferase 19E50 mRNA, complete cds [AY064481]	emb|CAD29479,1| glutathione transferase F6 [Triticum aestivum] emb|CAD29575,1| glutathione transferase [Triticum aestivum]
A_99_P200891	0.0343522	0.0122964	3.10796	1.63597	3.10796			gb|EMT04963,1| hypothetical protein F775_27729 [Aegilops tauschii]
A_99_P344516	0.0135537	0.00112897	3.15259	1.65654	3.15259		TSA: Triticum aestivum cultivar Bobwhite isotig12904,flagleaf mRNA sequence [HP622116]	gb|EMS59049,1| hypothetical protein TRIUR3_08315 [Triticum urartu]
A_99_P478852	0.0127836	0.000909622	3.16026	1.66004	3.16026		Rep: Chromosome chr16 scaffold_10, whole genome shotgun sequence - Vitis vinifera (Grape), partial (14%) [TC421510]	sp|Q84N28,1|FOMT1_WHEAT RecName: Full=Flavone O-methyltransferase 1; AltName: Full=Caffeic acid O-methyltransferase; Short=TaCOMT1 [Triticum aestivum] gb|AAP23942,1| caffeic acid O-methyltransferase [Triticum aestivum]
A_99_P295346	0.0271832	0.00746448	3.22722	1.69029	3.22722		Rep: Chromosome undetermined scaffold_222, whole genome shotgun sequence - Vitis vinifera (Grape), partial (38%) [TC405040]	gb|EMT08034,1| Peroxisomal-coenzyme A synthetase [Aegilops tauschii]
A_99_P255256	0.0171907	0.00281521	3.23068	1.69184	3.23068		Rep: Hydroxyproline-rich glycoprotein - Chlamydomonas reinhardtii, partial (9%) [TC414302]	gb|ACN35066,1| unknown [Zea mays]
A_99_P284721	0.0149098	0.00142135	3.23725	1.69477	3.23725		Rep: Integral membrane family protein-like - Oryza sativa subsp, japonica (Rice), partial (72%) [TC377974]	dbj|BAJ88632,1| predicted protein [Hordeum vulgare subsp, vulgare]
A_99_P200536	0.00880151	0.000164834	3.26374	1.70653	3.26374		Rep: Chromosome chr16 scaffold_10, whole genome shotgun sequence - Vitis vinifera (Grape), partial (14%) [TC421510]	N/A
A_99_P228326	0.0182468	0.00319594	3.26708	1.708	3.26708			N/A
A_99_P309201	0.0151869	0.00167103	3.2863	1.71646	3.2863		Rep: Alternative oxidase - Triticum aestivum (Wheat), complete [TC369763]	ref|NP_001167940,1| uncharacterized protein LOC100381654 [Zea mays] gb|ACN26586,1| unknown [Zea mays]
A_99_P369287	0.0327861	0.0112442	3.29648	1.72093	3.29648		Rep: Dehydration responsive element-binding protein 1 - Glycine soja (Wild soybean), partial (41%) [TC429879]	emb|CAN66638,1| hypothetical protein VITISV_018029 [Vitis vinifera]
A_99_P371417	0.0166121	0.00260027	3.30003	1.72248	3.30003	UGT	Triticum aestivum cultivar Wangshuibai UDP-glycosyltransferase (UGT) mRNA, complete cds [FJ236328]	gb|ACB47288,1| UDP-glucoronosyl/UDP-glucosyl transferase [Triticum aestivum]
A_99_P228471	0.0223212	0.00488947	3.31018	1.72691	3.31018			emb|CAC94005,1| glutathione transferase [Triticum aestivum] gb|EMT19277,1| hypothetical protein F775_26875 [Aegilops tauschii]
A_99_P563992	0.0360037	0.0134116	3.33741	1.73873	3.33741		Rep: Monodehydroascorbate reductase - Oryza sativa subsp, japonica (Rice), partial (37%) [TC407541]	gb|EMT04135,1| Monodehydroascorbate reductase [Aegilops tauschii]
A_99_P433182	0.0402145	0.0158336	3.36891	1.75228	3.36891		Rep: Blue copper protein - Zea mays (Maize), partial (85%) [TC391035]	gb|EMS49439,1| Blue copper protein [Triticum urartu]
A_99_P435737	0.0239423	0.00569659	3.40953	1.76957	3.40953		Rep: Os01g0740600 protein - Oryza sativa subsp, japonica (Rice), partial (98%) [TC393120]	ref|XP_003084249,1| unnamed protein product [Ostreococcus tauri] emb|CAL58314,1| unnamed protein product [Ostreococcus tauri]
A_99_P262616	0.0370201	0.0140783	3.43402	1.7799	3.43402			gb|AAM22755,1| sucrose synthase [Deschampsia antarctica]
A_99_P115985	0.00880151	0.000266897	3.45554	1.78891	3.45554			gb|ABD32806,1| Cyclin-like F-box; F-box protein interaction domain; Galactose oxidase, central, related [Medicago truncatula]
A_99_P255271	0.0248395	0.00616282	3.45998	1.79077	3.45998			N/A
A_99_P224741	0.0411354	0.0166466	3.47538	1.79717	3.47538		Rep: Monodehydroascorbate reductase - Oryza sativa subsp, japonica (Rice), partial (34%) [TC404007]	ref|XP_006351251,1| PREDICTED: zeatin O-glucosyltransferase-like [Solanum tuberosum]
A_99_P432662	0.0117549	0.000561707	3.47764	1.79811	3.47764			gb|EMS51401,1| hypothetical protein TRIUR3_15594 [Triticum urartu]
A_99_P261016	0.0184454	0.00324103	3.48617	1.80164	3.48617		Triticum aestivum cDNA, clone: WT002_B03, cultivar: Chinese Spring [AK331666]	gb|EMS58358,1| Glutamate dehydrogenase 2 [Triticum urartu]
A_99_P551602	0.0375272	0.0144019	3.48648	1.80177	3.48648		Rep: Zinc transporter ZIP - Triticum aestivum (Wheat), partial (15%) [TC452877]	gb|EMT21974,1| Zinc transporter 1 [Aegilops tauschii]
A_99_P543192	0.0230593	0.00539465	3.48865	1.80267	3.48865			dbj|BAE71292,1| putative ABC transporter like ATPase [Trifolium pratense]
A_99_P308926	0.0127836	0.000844459	3.48967	1.80309	3.48967		Rep: FAD binding domain containing protein, expressed - Oryza sativa subsp, japonica (Rice), partial (69%) [TC378719]	gb|EMS68722,1| 3-hydroxybenzoate 6-hydroxylase 1 [Triticum urartu]
A_99_P428987	0.0159307	0.00218859	3.49158	1.80388	3.49158		TSA: Triticum aestivum contig16929,TraeRec mRNA sequence [JP221722]	gb|EMT29648,1| hypothetical protein F775_07929 [Aegilops tauschii]
A_99_P327461	0.0316285	0.0104851	3.50331	1.80872	3.50331		Rep: PG1 - Hordeum vulgare (Barley), partial (11%) [TC432526]	gb|AAP46638,1| PG1 [Hordeum vulgare]
A_99_P270391	0.00880151	0.000267243	3.50691	1.8102	3.50691		Rep: Expressed protein - Arabidopsis thaliana (Mouse-ear cress), partial (18%) [TC391735]	ref|XP_003570270,1| PREDICTED: vacuolar amino acid transporter 1-like isoform 1 [Brachypodium distachyon]
A_99_P506462	0.0339595	0.0118972	3.50888	1.81101	3.50888			ref|XP_004239107,1| PREDICTED: uncharacterized protein At1g04910-like [Solanum lycopersicum]
A_99_P552847	0.0111988	0.000454902	3.52344	1.81698	3.52344			ref|XP_007013734,1| Embryo defective 2410 isoform 2 [Theobroma cacao] gb|EOY31353,1| Embryo defective 2410 isoform 2 [Theobroma cacao]
A_99_P261006	0.0198594	0.00368719	3.53458	1.82154	3.53458		Triticum aestivum cDNA, clone: WT002_B03, cultivar: Chinese Spring [AK331666]	gb|EMT15031,1| Glutamate dehydrogenase 2 [Aegilops tauschii]
A_99_P228406	0.0184883	0.00326697	3.53974	1.82364	3.53974		Rep: Glutathione transferase - Triticum aestivum (Wheat), partial (63%) [TC426474]	ref|XP_003638644,1| hypothetical protein MTR_138s0042 [Medicago truncatula] gb|AES85782,1| hypothetical protein MTR_138s0042 [Medicago truncatula]
A_99_P218741	0.0323881	0.0110596	3.54278	1.82488	3.54278			gb|ACJ05643,1| ferritin 1A [Triticum aestivum] gb|ACJ05646,1| ferritin 1A [Triticum aestivum] gb|ACJ05650,1| ferritin 1C [Triticum aestivum]
A_99_P133620	0.0323292	0.0109588	3.57123	1.83642	3.57123		Triticum aestivum clone wlmk4,pk0006,c8:fis, full insert mRNA sequence [BT009436]	gb|EMT26845,1| Alpha-aminoadipic semialdehyde synthase [Aegilops tauschii]
A_99_P431187	0.0166121	0.00261401	3.57409	1.83757	3.57409		Rep: Aldose reductase - Zea mays (Maize), partial (40%) [TC389453]	gb|EMT22693,1| Alcohol dehydrogenase (NADP+) A [Aegilops tauschii]
A_99_P158612	0.0360037	0.0133883	3.58757	1.84301	3.58757			gb|EMT04135,1| Monodehydroascorbate reductase [Aegilops tauschii]
A_99_P484672	0.0309593	0.00985448	3.59473	1.84588	3.59473			ref|XP_002322568,2| hypothetical protein POPTR_0016s02330g [Populus trichocarpa] gb|EEF04329,2| hypothetical protein POPTR_0016s02330g [Populus trichocarpa]
A_99_P211436	0.0405611	0.0161719	3.59777	1.8471	3.59777			gb|EEC74129,1| hypothetical protein OsI_09192 [Oryza sativa Indica Group]
A_99_P228341	0.0229841	0.0053516	3.59857	1.84742	3.59857		Rep: Glutathione transferase - Triticum aestivum (Wheat), complete [TC397554]	emb|CAC94005,1| glutathione transferase [Triticum aestivum] gb|EMT19277,1| hypothetical protein F775_26875 [Aegilops tauschii]
A_99_P265646	0.0154903	0.00191182	3.59911	1.84764	3.59911		Rep: Chromosome chr4 scaffold_32, whole genome shotgun sequence - Vitis vinifera (Grape), partial (76%) [TC390068]	N/A
A_99_P228336	0.020185	0.00383722	3.60501	1.85	3.60501			dbj|BAE71292,1| putative ABC transporter like ATPase [Trifolium pratense]
A_99_P037114	0.0277959	0.00778949	3.63203	1.86078	3.63203			ref|XP_006585487,1| PREDICTED: probable receptor-like protein kinase At1g11050-like [Glycine max]
A_99_P330681	0.0151091	0.00150513	3.63226	1.86087	3.63226			gb|EMT16840,1| hypothetical protein F775_43822 [Aegilops tauschii]
A_99_P329976	0.0121447	0.000628694	3.65287	1.86903	3.65287			gb|EMS51401,1| hypothetical protein TRIUR3_15594 [Triticum urartu]
A_99_P201241	0.0125509	0.000761147	3.66223	1.87272	3.66223		FGAS029692 Triticum aestivum FGAS: Library 6 CAP GATE 1 Triticum aestivum cDNA, mRNA sequence [CK217690]	gb|EMT04963,1| hypothetical protein F775_27729 [Aegilops tauschii]
A_99_P452397	0.0262118	0.00693286	3.66868	1.87526	3.66868		Rep: Os07g0671800 protein - Oryza sativa subsp, japonica (Rice), partial (31%) [TC405379]	N/A
A_99_P170159	0.0309593	0.0100068	3.67487	1.87769	3.67487		TSA: Triticum aestivum contig26898,TraeRec mRNA sequence [JP230944]	ref|XP_006842245,1| hypothetical protein AMTR_s00078p00192630 [Amborella trichopoda] gb|ERN03920,1| hypothetical protein AMTR_s00078p00192630 [Amborella trichopoda]
A_99_P191842	0.018007	0.00304969	3.67493	1.87772	3.67493		Triticum aestivum cDNA, clone: SET4_G01, cultivar: Chinese Spring [AK330405]	emb|CAI93180,1| glycosyltransferase [Triticum aestivum]
A_99_P518442	0.0166121	0.00262123	3.69696	1.88634	3.69696		Rep: Expressed protein - Oryza sativa subsp, japonica (Rice), partial (26%) [TC439897]	gb|EMS57988,1| hypothetical protein TRIUR3_31122 [Triticum urartu]
A_99_P422297	0.016871	0.00268726	3.71313	1.89263	3.71313		Rep: Competence protein - Neisseria meningitidis serogroup A, partial (4%) [TC382490]	gb|EMS59049,1| hypothetical protein TRIUR3_08315 [Triticum urartu]
A_99_P270386	0.0127836	0.000986582	3.71638	1.8939	3.71638		Rep: beta-galactosidase - Entamoeba histolytica HM-1:IMSS, partial (17%) [TC450414]	ref|XP_002956407,1| hypothetical protein VOLCADRAFT_107185 [Volvox carteri f, nagariensis] gb|EFJ42551,1| hypothetical protein VOLCADRAFT_107185 [Volvox carteri f, nagariensis]
A_99_P412942	0.0154903	0.0020351	3.7204	1.89546	3.7204		Rep: UDP-glucoronosyl and UDP-glucosyl transferase family protein, expressed - Oryza sativa subsp, japonica (Rice), partial (45%) [TC374837]	ref|XP_003589518,1| F-box/LRR-repeat protein [Medicago truncatula] gb|AES59769,1| F-box/LRR-repeat protein [Medicago truncatula]
A_99_P551942	0.0267735	0.00729939	3.74344	1.90436	3.74344		TSA: Triticum aestivum contig26898,TraeRec mRNA sequence [JP230944]	gb|EMT01615,1| Myb-like protein J [Aegilops tauschii]
A_99_P269621	0.01963	0.00359574	3.74623	1.90544	3.74623		Rep: Glutathione transferase - Triticum aestivum (Wheat), partial (91%) [TC375617]	gb|EMT30901,1| hypothetical protein F775_26086 [Aegilops tauschii]
A_99_P532197	0.0154903	0.00188566	3.78848	1.92162	3.78848		Rep: Os07g0663500 protein - Oryza sativa subsp, japonica (Rice), partial (57%) [TC445401]	gb|EMS55727,1| Sex determination protein tasselseed-2 [Triticum urartu]
A_99_P500287	0.0127836	0.000963819	3.79619	1.92455	3.79619			ref|XP_004146678,1| PREDICTED: APO protein 2, chloroplastic-like [Cucumis sativus] ref|XP_004161867,1| PREDICTED: APO protein 2, chloroplastic-like [Cucumis sativus]
A_99_P343256	0.0181777	0.00316225	3.80172	1.92665	3.80172			gb|ACR38084,1| unknown [Zea mays]
A_99_P071560	0.0381911	0.0147518	3.81563	1.93192	3.81563		Triticum aestivum clone wlm96,pk030,e11:fis, full insert mRNA sequence [BT009376]	ref|XP_004981325,1| PREDICTED: adenylate isopentenyltransferase 5, chloroplastic-like [Setaria italica]
A_99_P256836	0.0111988	0.000460102	3.83268	1.93835	3.83268		Rep: Isoform 2 of Q0JGZ6 - Oryza sativa subsp, japonica (Rice), partial (54%) [TC381624]	gb|EMT20285,1| hypothetical protein F775_30384 [Aegilops tauschii]
A_99_P360906	0.0240011	0.00574641	3.83762	1.94021	3.83762		Rep: 3'-N-debenzoyltaxol N-benzoyltransferase-like - Oryza sativa subsp, japonica (Rice), partial (6%) [TC436128]	emb|CAA52158,1| alpha tubulin [Zea mays]
A_99_P172124	0.0319024	0.0107269	3.84509	1.94302	3.84509			gb|ACB47288,1| UDP-glucoronosyl/UDP-glucosyl transferase [Triticum aestivum]
A_99_P316786	0.0172787	0.00284682	3.86131	1.94909	3.86131			ref|XP_003589518,1| F-box/LRR-repeat protein [Medicago truncatula] gb|AES59769,1| F-box/LRR-repeat protein [Medicago truncatula]
A_99_P425222	0.029678	0.00901949	3.86323	1.94981	3.86323		Rep: Non-specific lipid-transfer protein - Oryza sativa subsp, indica (Rice), partial (62%) [TC384883]	gb|ABC87311,1| sporocyteless [Brassica juncea]
A_99_P203391	0.0151091	0.00150932	3.87662	1.9548	3.87662			gb|ABC69389,1| CYP72A52v1 [Nicotiana tabacum]
A_99_P261796	0.0188471	0.00337727	3.89566	1.96187	3.89566			gb|ABX45922,1| xanthine dehydrogenase [Pereskia portulacifolia]
A_99_P087025	0.022932	0.00525489	3.90095	1.96383	3.90095		FGAS050163 Triticum aestivum FGAS: TaLt7 Triticum aestivum cDNA, mRNA sequence [CK166105]	N/A
A_99_P553062	0.0151091	0.00158966	3.94823	1.98121	3.94823		Rep: Peroxisomal-coenzyme a synthetase - Oryza sativa subsp, indica (Rice), partial (87%) [TC453441]	gb|EMT08034,1| Peroxisomal-coenzyme A synthetase [Aegilops tauschii]
A_99_P512412	0.0166121	0.00248159	4.03023	2.01086	4.03023		Rep: Hydroxyproline-rich glycoprotein - Medicago truncatula (Barrel medic), partial (29%) [TC437128]	dbj|BAK00377,1| predicted protein [Hordeum vulgare subsp, vulgare]
A_99_P255266	0.0171964	0.00282469	4.03491	2.01254	4.03491		Triticum aestivum cDNA, clone: WT006_I01, cultivar: Chinese Spring [AK333449]	ref|XP_001420892,1| predicted protein [Ostreococcus lucimarinus CCE9901] gb|ABO99185,1| predicted protein [Ostreococcus lucimarinus CCE9901]
A_99_P261026	0.0409223	0.0165196	4.09418	2.03358	4.09418		Rep: Chromosome chr14 scaffold_9, whole genome shotgun sequence - Vitis vinifera (Grape), partial (66%) [TC410236]	gb|EMS49006,1| Pto-interacting protein 1 [Triticum urartu]
A_99_P484697	0.0225474	0.00502806	4.11037	2.03927	4.11037		Rep: Epoxide hydrolase - Ananas comosus (Pineapple), partial (36%) [TC424558]	gb|EMT10705,1| hypothetical protein F775_43222 [Aegilops tauschii]
A_99_P311086	0.0147865	0.00139842	4.11176	2.03976	4.11176		Rep: Os05g0518800 protein - Oryza sativa subsp, japonica (Rice), partial (37%) [TC390408]	gb|EMS45032,1| Sulfate transporter 4,1, chloroplastic [Triticum urartu]
A_99_P562367	0.00880151	0.000207694	4.15251	2.05398	4.15251		Rep: Senescence-inducible chloroplast stay-green protein - Hordeum vulgare (Barley), partial (46%) [TC457227]	N/A
A_99_P011329	0.0313308	0.0103195	4.17014	2.0601	4.17014		Triticum aestivum clone wr1,pk0085,h9:fis, full insert mRNA sequence [BT009504]	gb|EMS57040,1| Nicotianamine aminotransferase A [Triticum urartu]
A_99_P470817	0.00880151	0.000113585	4.19969	2.07028	4.19969			gb|EMS51759,1| Long-chain-alcohol oxidase FAO2 [Triticum urartu]
A_99_P475097	0.00880151	0.000213085	4.24611	2.08614	4.24611		Rep: Chromosome chr1 scaffold_136, whole genome shotgun sequence - Vitis vinifera (Grape), partial (97%) [TC419481]	ref|XP_007148555,1| hypothetical protein PHAVU_006G218500g [Phaseolus vulgaris] gb|ESW20549,1| hypothetical protein PHAVU_006G218500g [Phaseolus vulgaris]
A_99_P322261	0.0177525	0.0029779	4.24932	2.08723	4.24932			ref|XP_006585216,1| PREDICTED: G-type lectin S-receptor-like serine/threonine-protein kinase At1g67520-like [Glycine max]
A_99_P449637	0.0145617	0.00134817	4.30757	2.10688	4.30757		Rep: L-allo-threonine aldolase-related protein - Solanum tuberosum (Potato), partial (18%) [TC403445]	gb|EMS52584,1| L-allo-threonine aldolase [Triticum urartu]
A_99_P391837	0.0221812	0.00478726	4.33774	2.11694	4.33774		Rep: GRAB2 protein - Triticum sp, partial (52%) [TC403220]	N/A
A_99_P341521	0.0166121	0.00258174	4.33885	2.11731	4.33885		Rep: PREDICTED: keratin 3 - Pan troglodytes, partial (5%) [TC414666]	ref|XP_006282175,1| hypothetical protein CARUB_v10028437mg [Capsella rubella] gb|EOA15073,1| hypothetical protein CARUB_v10028437mg [Capsella rubella]
A_99_P166249	0.0166121	0.00256773	4.46283	2.15796	4.46283		Rep: Metallothionein-like protein type 3 - Hordeum vulgare var, distichum (Two-rowed barley), partial (95%) [TC395998]	dbj|BAK06155,1| predicted protein [Hordeum vulgare subsp, vulgare] gb|AFK12211,1| metallothionein [Hordeum vulgare]
A_99_P016209	0.0151869	0.00167294	4.49963	2.16981	4.49963		Rep: Anthranilate phosphoribosyltransferase-like protein - Arabidopsis thaliana (Mouse-ear cress), partial (52%) [TC431733]	ref|XP_003563223,1| PREDICTED: tRNA dimethylallyltransferase 9-like [Brachypodium distachyon]
A_99_P446552	0.0192504	0.00350704	4.53002	2.17952	4.53002		Rep: Metallothionein-like protein type 3 - Hordeum vulgare var, distichum (Two-rowed barley), complete [TC401261]	gb|EMT20371,1| hypothetical protein F775_43862 [Aegilops tauschii]
A_99_P202516	0.0120589	0.000589743	4.55237	2.18662	4.55237		Rep: Chromosome chr1 scaffold_136, whole genome shotgun sequence - Vitis vinifera (Grape), partial (97%) [TC419481]	ref|XP_007040513,1| AMP-dependent synthetase and ligase family protein isoform 1 [Theobroma cacao] ref|XP_007040514,1| AMP-dependent synthetase and ligase family protein isoform 1 [Theobroma cacao] gb|EOY25014,1| AMP-dependent synthetase and ligase family protein isoform 1 [Theobroma cacao] gb|EOY25015,1| AMP-dependent synthetase and ligase family protein isoform 1 [Theobroma cacao]
A_99_P325336	0.0178218	0.00299839	4.57596	2.19408	4.57596		Rep: Glucose-6-phosphate 1-dehydrogenase - Vitis vinifera (Grape), partial (24%) [TC404131]	ref|XP_002453446,1| hypothetical protein SORBIDRAFT_04g006090 [Sorghum bicolor] gb|EES06422,1| hypothetical protein SORBIDRAFT_04g006090 [Sorghum bicolor]
A_99_P161637	0.0202093	0.00389413	4.59183	2.19907	4.59183	WRN3	FGAS053798 Triticum aestivum FGAS: Library 2 Gate 3 Triticum aestivum cDNA, mRNA sequence [CV759414]	emb|CAI93180,1| glycosyltransferase [Triticum aestivum]
A_99_P278301	0.0221812	0.00480706	4.5932	2.1995	4.5932		Rep: Gt-2 - Oryza sativa (Rice), partial (33%) [TC403644]	ref|XP_004142896,1| PREDICTED: F-box protein At3g12350-like [Cucumis sativus] ref|XP_004156384,1| PREDICTED: F-box protein At3g12350-like [Cucumis sativus]
A_99_P343251	0.00653832	4.71031e-05	4.6115	2.20524	4.6115			gb|ACR38084,1| unknown [Zea mays]
A_99_P562667	0.0235894	0.00559702	4.63509	2.2126	4.63509		Rep: Expressed protein - Oryza sativa subsp, japonica (Rice), partial (53%) [TC457121]	dbj|BAK04993,1| predicted protein [Hordeum vulgare subsp, vulgare]
A_99_P261801	0.0151869	0.00165107	4.6366	2.21307	4.6366		Rep: Phosphate translocator-like - Oryza sativa subsp, japonica (Rice), partial (90%) [TC377102]	ref|XP_002947569,1| hypothetical protein VOLCADRAFT_87820 [Volvox carteri f, nagariensis] gb|EFJ51617,1| hypothetical protein VOLCADRAFT_87820 [Volvox carteri f, nagariensis]
A_99_P132240	0.0223212	0.00489977	4.66011	2.22036	4.66011		CJ665569 Y,Ogihara unpublished cDNA library Wh_KMP Triticum aestivum cDNA clone whkp4a17 5', mRNA sequence [CJ665569]	dbj|BAJ92799,1| predicted protein [Hordeum vulgare subsp, vulgare] dbj|BAK00760,1| predicted protein [Hordeum vulgare subsp, vulgare] dbj|BAJ97506,1| predicted protein [Hordeum vulgare subsp, vulgare]
A_99_P295351	0.0137036	0.00122663	4.74781	2.24726	4.74781		Rep: Peroxisomal-coenzyme a synthetase - Oryza sativa subsp, indica (Rice), partial (87%) [TC453441]	gb|EMT08034,1| Peroxisomal-coenzyme A synthetase [Aegilops tauschii]
A_99_P145261	0.0240466	0.00582912	4.75409	2.24917	4.75409		wdi1c,pk004,o6 wdi1c Triticum aestivum cDNA clone wdi1c,pk004,o6 5' end, mRNA sequence [CA728497]	gb|EMT20240,1| hypothetical protein F775_17895 [Aegilops tauschii]
A_99_P166809	0.0164557	0.00236137	4.78446	2.25835	4.78446		G608,103G02F010904 G608 Triticum aestivum cDNA clone G608103G02, mRNA sequence [CD916898]	gb|EMT01729,1| hypothetical protein F775_26337 [Aegilops tauschii]
A_99_P231561	0.0267735	0.00730309	4.78747	2.25926	4.78747		Rep: Legumain-like protease precursor - Zea mays (Maize), partial (17%) [TC416366]	N/A
A_99_P295261	0.0370615	0.0141125	4.83375	2.27314	4.83375			ref|XP_003575633,1| PREDICTED: uncharacterized protein LOC100824418 [Brachypodium distachyon]
A_99_P255776	0.0127836	0.000858697	4.86338	2.28196	4.86338			N/A
A_99_P024759	0.00880151	0.000254932	4.86869	2.28353	4.86869		TSA: Triticum aestivum contig12522,TraeRec mRNA sequence [JP217799]	dbj|BAJ89172,1| predicted protein [Hordeum vulgare subsp, vulgare]
A_99_P215111	0.00653832	5.27156e-05	4.89913	2.29253	4.89913			emb|CBI29667,3| unnamed protein product [Vitis vinifera]
A_99_P549752	0.0220881	0.00473866	4.93094	2.30186	4.93094		CJ665569 Y,Ogihara unpublished cDNA library Wh_KMP Triticum aestivum cDNA clone whkp4a17 5', mRNA sequence [CJ665569]	dbj|BAJ92799,1| predicted protein [Hordeum vulgare subsp, vulgare] dbj|BAK00760,1| predicted protein [Hordeum vulgare subsp, vulgare] dbj|BAJ97506,1| predicted protein [Hordeum vulgare subsp, vulgare]
A_99_P245036	0.0166121	0.0025525	5.00504	2.32338	5.00504			ref|XP_002879389,1| ent-kaurenoic acid hydroxylase [Arabidopsis lyrata subsp, lyrata] gb|EFH55648,1| ent-kaurenoic acid hydroxylase [Arabidopsis lyrata subsp, lyrata]
A_99_P303276	0.0240323	0.00578726	5.04429	2.33465	5.04429		Triticum aestivum cDNA, clone: SET4_O03, cultivar: Chinese Spring [AK330613]	gb|EMT22845,1| Lycopene beta cyclase, chloroplastic [Aegilops tauschii]
A_99_P256846	0.00880151	0.000198949	5.07781	2.34421	5.07781			emb|CAN81149,1| hypothetical protein VITISV_020815 [Vitis vinifera]
A_99_P284731	0.00880151	9.1362e-05	5.09334	2.34861	5.09334		Rep: Integral membrane family protein-like - Oryza sativa subsp, japonica (Rice), partial (53%) [TC401879]	gb|EMT15072,1| hypothetical protein F775_08073 [Aegilops tauschii]
A_99_P235241	0.0262118	0.00692611	5.11123	2.35367	5.11123			gb|EMT13367,1| Putative aquaporin TIP2-2 [Aegilops tauschii]
A_99_P339971	0.0254757	0.00655596	5.11468	2.35464	5.11468		Rep: Chromosome chr6 scaffold_3, whole genome shotgun sequence - Vitis vinifera (Grape), partial (27%) [TC404695]	gb|AEH43880,1| EFR [Biscutella auriculata]
A_99_P016799	0.0319024	0.0106891	5.18111	2.37326	5.18111	LOC543168	Triticum aestivum ADP-glucose pyrophosphorylase small subunit mRNA, complete cds; plastid [AY727927]	ref|XP_003577084,1| PREDICTED: cytochrome P450 94A1-like [Brachypodium distachyon]
A_99_P257091	0.00368733	3.67081e-06	5.22103	2.38434	5.22103		Rep: Chromosome chr14 scaffold_128, whole genome shotgun sequence - Vitis vinifera (Grape), partial (39%) [TC382170]	gb|EYU30493,1| hypothetical protein MIMGU_mgv1a024563mg, partial [Mimulus guttatus]
A_99_P256776	0.0151091	0.001607	5.3145	2.40993	5.3145		Triticum aestivum cDNA, clone: WT006_P14, cultivar: Chinese Spring [AK333639]	ref|XP_002450281,1| hypothetical protein SORBIDRAFT_05g003140 [Sorghum bicolor] gb|EES09269,1| hypothetical protein SORBIDRAFT_05g003140 [Sorghum bicolor]
A_99_P498457	0.0151968	0.00169699	5.34813	2.41904	5.34813		Triticum aestivum cDNA, clone: WT006_P14, cultivar: Chinese Spring [AK333639]	gb|EMT10118,1| NAD(P)H-dependent 6'-deoxychalcone synthase [Aegilops tauschii]
A_99_P215086	0.00653832	5.10346e-05	5.34824	2.41907	5.34824			gb|EMS68460,1| hypothetical protein TRIUR3_05895 [Triticum urartu]
A_99_P456357	0.0292826	0.00871628	5.36192	2.42275	5.36192		TSA: Triticum aestivum cultivar Bobwhite isotig15362,flagleaf mRNA sequence [HP624580]	gb|EMT13367,1| Putative aquaporin TIP2-2 [Aegilops tauschii]
A_99_P291391	0.0127836	0.000962722	5.40998	2.43562	5.40998			ref|XP_002953136,1| hypothetical protein VOLCADRAFT_105823 [Volvox carteri f, nagariensis] gb|EFJ45735,1| hypothetical protein VOLCADRAFT_105823 [Volvox carteri f, nagariensis]
A_99_P307251	0.0220704	0.00471423	5.45126	2.44659	5.45126		Rep: Glycolate oxidase - Zantedeschia aethiopica (White calla lily), partial (80%) [TC384194]	N/A
A_99_P235221	0.0365174	0.0137781	5.51007	2.46207	5.51007			ref|XP_002307815,2| hypothetical protein POPTR_0005s27720g [Populus trichocarpa] gb|EEE94811,2| hypothetical protein POPTR_0005s27720g [Populus trichocarpa]
A_99_P412102	0.0187403	0.00334881	5.51962	2.46457	5.51962	cla30	Triticum aestivum mRNA for putative In2,1-like protein [Y17386]	emb|CAA76758,1| putative In2,1 protein [Triticum aestivum]
A_99_P479897	0.0134799	0.00109521	5.56045	2.4752	5.56045		Rep: PE-PGRS family protein - Mycobacterium tuberculosis (strain F11), partial (5%) [TC422054]	gb|EMT28515,1| hypothetical protein F775_29119 [Aegilops tauschii]
A_99_P410912	0.0124036	0.0006733	5.58707	2.48209	5.58707	FKBP77	Triticum aestivum cDNA, clone: WT004_M12, cultivar: Chinese Spring [AK332751]	gb|EMT25795,1| 70 kDa peptidyl-prolyl isomerase [Aegilops tauschii]
A_99_P235196	0.0285883	0.00841001	5.64465	2.49688	5.64465		TSA: Triticum aestivum cultivar Bobwhite isotig15362,flagleaf mRNA sequence [HP624580]	gb|EMT13367,1| Putative aquaporin TIP2-2 [Aegilops tauschii]
A_99_P309716	0.00880151	0.000180291	5.67231	2.50394	5.67231		Rep: Multidrug resistance associated protein 1 - Zea mays (Maize), partial (12%) [TC425558]	N/A
A_99_P335751	0.0355598	0.0130597	5.75104	2.52382	5.75104		Rep: Chromosome chr14 scaffold_128, whole genome shotgun sequence - Vitis vinifera (Grape), partial (66%) [TC405171]	gb|EXB30677,1| hypothetical protein L484_001323 [Morus notabilis]
A_99_P456682	0.0263231	0.00705446	5.7799	2.53105	5.7799		Rep: LigA - Anaeromyxobacter sp, (strain Fw109-5), partial (9%) [TC401695]	emb|CAI93180,1| glycosyltransferase [Triticum aestivum]
A_99_P501777	0.0403797	0.0160192	5.81302	2.53929	5.81302		Rep: UDP-glucoronosyl and UDP-glucosyl transferase family protein, expressed - Oryza sativa subsp, japonica (Rice), partial (22%) [TC432501]	gb|EMS49580,1| Hydroquinone glucosyltransferase [Triticum urartu]
A_99_P000097	0.0213423	0.00437931	5.95227	2.57344	5.95227	LOC542972	Triticum aestivum mRNA for sucrose synthase type 2 [AJ000153]	emb|CAA75793,1| sucrose synthase 2 [Hordeum vulgare subsp, vulgare]
A_99_P141418	0.00880151	0.000180031	5.96882	2.57745	5.96882		CJ859149 Y, Ogihara unpublished cDNA library, whsctal Triticum aestivum cDNA clone whsctal7k13 5', mRNA sequence [CJ859149]	ref|XP_004492420,1| PREDICTED: pentatricopeptide repeat-containing protein At4g28010-like [Cicer arietinum]
A_99_P245041	0.0151869	0.00165717	5.97961	2.58005	5.97961	LOC100682438	Triticum aestivum cDNA, clone: SET5_G19, cultivar: Chinese Spring [AK330832]	gb|EMT11675,1| hypothetical protein F775_28879 [Aegilops tauschii]
A_99_P309721	0.00738611	6.61772e-05	6.04385	2.59547	6.04385		Rep: Multidrug resistance associated protein 1 - Zea mays (Maize), partial (16%) [TC374067]	ref|YP_635945,1| cell division protein [Acutodesmus obliquus] gb|ABD48227,1| cell division protein [Acutodesmus obliquus]
A_99_P314056	0.029838	0.00916378	6.13982	2.6182	6.13982		FGAS058640 Triticum aestivum FGAS: Library 2 Gate 3 Triticum aestivum cDNA, mRNA sequence [CV764256]	gb|EMT12599,1| Iron sulfur cluster assembly protein 1, mitochondrial [Aegilops tauschii]
A_99_P528152	0.0154903	0.00199644	6.15436	2.62161	6.15436	LOC100682438	Triticum aestivum cDNA, clone: SET5_G19, cultivar: Chinese Spring [AK330832]	gb|EMT11675,1| hypothetical protein F775_28879 [Aegilops tauschii]
A_99_P235226	0.0452606	0.0190595	6.16427	2.62393	6.16427			gb|AEW26991,1| phytochrome P [Pseudotsuga menziesii]
A_99_P546037	0.0417774	0.0170891	6.16439	2.62396	6.16439			gb|AEW26991,1| phytochrome P [Pseudotsuga menziesii]
A_99_P504752	0.0137036	0.00121502	6.21216	2.6351	6.21216		Rep: Chromosome undetermined SCAF5463, whole genome shotgun sequence - Tetraodon nigroviridis (Green puffer), partial (5%) [TC423811]	gb|EEE58855,1| hypothetical protein OsJ_10446 [Oryza sativa Japonica Group]
A_99_P364371	0.0176325	0.00294021	6.40791	2.67985	6.40791			gb|EMT28611,1| hypothetical protein F775_13942 [Aegilops tauschii]
A_99_P341356	0.00880151	0.000204692	6.50448	2.70143	6.50448		Rep: Os01g0740600 protein - Oryza sativa subsp, japonica (Rice), complete [TC428972]	ref|XP_007162581,1| hypothetical protein PHAVU_001G163400g [Phaseolus vulgaris] gb|ESW34575,1| hypothetical protein PHAVU_001G163400g [Phaseolus vulgaris]
A_99_P387057	0.0151091	0.00151657	6.55472	2.71253	6.55472		Rep: AAA-type ATPase-like - Oryza sativa subsp, japonica (Rice), partial (49%) [TC428037]	dbj|BAK01782,1| predicted protein [Hordeum vulgare subsp, vulgare]
A_99_P386442	0.0186052	0.00331541	6.60874	2.72438	6.60874		Rep: Galactose-binding like - Medicago truncatula (Barrel medic), partial (25%) [TC392167]	gb|EMS66623,1| hypothetical protein TRIUR3_18044 [Triticum urartu]
A_99_P235306	0.0309593	0.00997531	6.61957	2.72674	6.61957		Rep: Delta tonoplast intrinsic protein TIP2;3 - Triticum aestivum (Wheat), partial (74%) [TC414252]	gb|EXC05111,1| hypothetical protein L484_011900 [Morus notabilis]
A_99_P001676	0.0202093	0.00386145	6.72618	2.74979	6.72618		GR45,122P24F010720 GR45 Triticum aestivum cDNA clone GR45122P24, mRNA sequence [GH731479]	gb|AAF82233,1|AC069143_9 Contains a strong similarity to a respiratory burst oxidase protein E (RbohE) from Arabidopsis thaliana gb|AF055356 and contains an EF hand PF|00036 and ferric reductase transmembrane component PF|01794 domains [Arabidopsis thaliana]
A_99_P088835	0.00880151	9.40131e-05	6.84007	2.77401	6.84007		FGAS083226 Triticum aestivum FGAS: Library 6 CAP GATE 1 Triticum aestivum cDNA, mRNA sequence [DR738009]	ref|NP_001061558,1| Os08g0327700 [Oryza sativa Japonica Group] dbj|BAD03453,1| putative seed maturation protein [Oryza sativa Japonica Group] dbj|BAD03626,1| putative seed maturation protein [Oryza sativa Japonica Group] dbj|BAF23472,1| Os08g0327700 [Oryza sativa Japonica Group] dbj|BAG98210,1| unnamed protein product [Oryza sativa Japonica Group]
A_99_P162102	0.0151091	0.00160374	6.89994	2.78658	6.89994	cla30	Triticum aestivum mRNA for putative In2,1-like protein [Y17386]	emb|CAA76758,1| putative In2,1 protein [Triticum aestivum]
A_99_P235296	0.0468671	0.0202881	6.94147	2.79524	6.94147			gb|EXC05111,1| hypothetical protein L484_011900 [Morus notabilis]
A_99_P435227	0.0120927	0.000619985	6.94735	2.79646	6.94735		Triticum aestivum cDNA, clone: WT006_N18, cultivar: Chinese Spring [AK333593]	gb|EMT16535,1| hypothetical protein F775_08208 [Aegilops tauschii]
A_99_P225476	0.0127836	0.000835009	7.0363	2.81482	7.0363			emb|CAA71053,1| pSBGer4 [Triticum aestivum]
A_99_P256781	0.0168797	0.00269706	7.1774	2.84346	7.1774		Triticum aestivum cDNA, clone: WT006_P14, cultivar: Chinese Spring [AK333639]	gb|EMT10118,1| NAD(P)H-dependent 6'-deoxychalcone synthase [Aegilops tauschii]
A_99_P227381	0.0421227	0.017281	7.26748	2.86146	7.26748		Rep: Chromosome chr1 scaffold_46, whole genome shotgun sequence - Vitis vinifera (Grape), partial (36%) [TC439822]	N/A
A_99_P218296	0.0483792	0.0216008	7.33111	2.87403	7.33111			gb|EMT33156,1| hypothetical protein F775_10492 [Aegilops tauschii]
A_99_P222576	0.0478557	0.0210279	7.47897	2.90284	7.47897		Rep: Chitinase II - Triticum aestivum (Wheat), partial (70%) [TC393117]	dbj|BAK08163,1| predicted protein [Hordeum vulgare subsp, vulgare]
A_99_P215106	0.00584431	3.17788e-05	7.53788	2.91416	7.53788			gb|AFU72298,1| delta-1-pyrroline-5-carboxylate synthetase, partial [Deschampsia antarctica]
A_99_P344156	0.0168988	0.00273655	7.6205	2.92989	7.6205		Rep: Os09g0325700 protein - Oryza sativa subsp, japonica (Rice), partial (37%) [TC425151]	gb|EMT31026,1| hypothetical protein F775_42340 [Aegilops tauschii]
A_99_P369808	0.025087	0.00635605	7.62914	2.93152	7.62914		Rep: Chromosome chr18 scaffold_122, whole genome shotgun sequence - Vitis vinifera (Grape), partial (76%) [TC412850]	dbj|BAK05012,1| predicted protein [Hordeum vulgare subsp, vulgare]
A_99_P411612	0.00880151	0.000202855	7.70775	2.94631	7.70775		Rep: Aldehyde dehydrogenase family 7 member A1 - Euphorbia characias (Spurge), partial (34%) [TC373622]	gb|AFA36500,1| aldehyde dehydrogenase 7b, partial [Lolium perenne]
A_99_P225456	0.0220704	0.00471334	7.84556	2.97188	7.84556		Rep: PSBGer1 protein - Triticum aestivum (Wheat), complete [TC372166]	emb|CAA71053,1| pSBGer4 [Triticum aestivum]
A_99_P293966	0.0399452	0.0157077	7.91635	2.98484	7.91635		Rep: LigA - Anaeromyxobacter sp, (strain Fw109-5), partial (9%) [TC401695]	ref|NP_680148,1| E3 ubiquitin ligase BIG BROTHER [Arabidopsis thaliana] ref|NP_001030922,1| E3 ubiquitin ligase BIG BROTHER [Arabidopsis thaliana] sp|Q8L649,1|BB_ARATH RecName: Full=E3 ubiquitin ligase BIG BROTHER; AltName: Full=Protein ENHANCER OF DA1-1 emb|CAD32249,1| putative protein [Arabidopsis thaliana] gb|AAQ22666,1| At3g63530 [Arabidopsis thaliana] dbj|BAE99660,1| hypothetical protein [Ar…
A_99_P218061	0.0459818	0.0196607	8.00414	3.00075	8.00414			gb|EMT33157,1| hypothetical protein F775_05054 [Aegilops tauschii]
A_99_P322011	0.0113247	0.000494424	8.09201	3.0165	8.09201		BJ222628 Y, Ogihara unpublished cDNA library, Wh_dL Triticum aestivum cDNA clone whdl14m17 5', mRNA sequence [BJ222628]	N/A
A_99_P491842	0.0151869	0.0016411	8.22984	3.04086	8.22984	LOC100682438	Triticum aestivum cDNA, clone: SET5_G19, cultivar: Chinese Spring [AK330832]	gb|AAK11565,1|AF318501_1 ent-kaurenoic acid hydroxylase [Arabidopsis thaliana]
A_99_P245061	0.0120589	0.000600242	8.23865	3.04241	8.23865		Rep: Aldehyde dehydrogenase family 7 member A1 - Euphorbia characias (Spurge), partial (34%) [TC373622]	gb|AFA36500,1| aldehyde dehydrogenase 7b, partial [Lolium perenne]
A_99_P526947	0.000394531	1.96382e-07	8.24095	3.04281	8.24095		Triticum aestivum cDNA, clone: WT009_F15, cultivar: Chinese Spring [AK334289]	gb|EMS45159,1| hypothetical protein TRIUR3_27172 [Triticum urartu]
A_99_P496107	0.0343522	0.0123717	8.36249	3.06393	8.36249			gb|EMS47785,1| Sugar transporter ERD6-like 6 [Triticum urartu]
A_99_P425517	0.047205	0.0205832	8.38595	3.06797	8.38595		Rep: Chromosome chr1 scaffold_46, whole genome shotgun sequence - Vitis vinifera (Grape), partial (95%) [TC405153]	dbj|BAJ99970,1| predicted protein [Hordeum vulgare subsp, vulgare]
A_99_P017619	0.0162527	0.00228946	8.40074	3.07052	8.40074	A211	Triticum aestivum A211 mRNA for fructan exohydrolase, complete cds [AB089270]	N/A
A_99_P112790	0.0166121	0.00256052	8.44185	3.07756	8.44185	C311	Triticum aestivum C311 mRNA for fructan exohydrolase, complete cds [AB089271]	dbj|BAD99105,1| fructan exohydrolase [Triticum aestivum]
A_99_P282796	0.0229841	0.00533293	8.48967	3.08571	8.48967		Rep: Serine-threonine protein kinase - Triticum aestivum (Wheat), partial (56%) [TC414795]	gb|AAB58348,1|AAB58348 serine-threonine protein kinase [Triticum aestivum]
A_99_P378397	0.0133526	0.00107007	8.56554	3.09854	8.56554		Rep: F12K11,17 - Arabidopsis thaliana (Mouse-ear cress), partial (18%) [TC374558]	gb|EMT30860,1| Callose synthase 7 [Aegilops tauschii]
A_99_P293971	0.0278671	0.00785106	9.06622	3.1805	9.06622			ref|NP_680148,1| E3 ubiquitin ligase BIG BROTHER [Arabidopsis thaliana] ref|NP_001030922,1| E3 ubiquitin ligase BIG BROTHER [Arabidopsis thaliana] sp|Q8L649,1|BB_ARATH RecName: Full=E3 ubiquitin ligase BIG BROTHER; AltName: Full=Protein ENHANCER OF DA1-1 emb|CAD32249,1| putative protein [Arabidopsis thaliana] gb|AAQ22666,1| At3g63530 [Arabidopsis thaliana] dbj|BAE99660,1| hypothetical protein [Ar…
A_99_P329001	0.00880151	0.000136222	9.12043	3.1891	9.12043		Rep: myeloid/lymphoid or mixed-lineage leukemia 5 - Takifugu rubripes, partial (3%) [TC399889]	gb|EMT11544,1| hypothetical protein F775_21245 [Aegilops tauschii]
A_99_P225396	0.0150951	0.00148772	9.25595	3.21038	9.25595	pSBGer3	T,aestivum mRNA for germin-like protein 3 [Y09917]	gb|ACQ41882,1| germin-like protein 2 [Triticum aestivum]
A_99_P551572	0.0125509	0.000738679	9.27135	3.21278	9.27135		TSA: Triticum aestivum cultivar Bobwhite isotig09952,flagleaf mRNA sequence [HP619154]	ref|XP_006399863,1| hypothetical protein EUTSA_v10012453mg [Eutrema salsugineum] gb|ESQ41316,1| hypothetical protein EUTSA_v10012453mg [Eutrema salsugineum]
A_99_P123865	0.0125509	0.000717559	9.29799	3.21692	9.29799		FGAS066313 Triticum aestivum FGAS: Library 2 Gate 3 Triticum aestivum cDNA, mRNA sequence [CV771920]	emb|CAI93180,1| glycosyltransferase [Triticum aestivum]
A_99_P416087	0.0149098	0.00142493	9.34747	3.22458	9.34747		Rep: Gibberellin 2-oxidase - Lolium temulentum (Darnel ryegrass), partial (40%) [TC377351]	gb|AFE85998,1| gibberellin 2-oxidase 3 isozyme D1 [Triticum aestivum] gb|AFV79561,1| gibberellin 2-oxidase 1-1 [Triticum aestivum] gb|AFV79562,1| gibberellin 2-oxidase 1-2 [Triticum aestivum] gb|AFV79566,1| gibberellin 2-oxidase 1-6 [Triticum aestivum]
A_99_P136025	0.0135911	0.00118316	9.3516	3.22521	9.3516		Rep: Chromosome chr11 scaffold_13, whole genome shotgun sequence - Vitis vinifera (Grape), partial (4%) [TC440531]	gb|EMT08802,1| Putative glutamate carboxypeptidase 2 [Aegilops tauschii]
A_99_P488347	0.0402687	0.015875	9.55679	3.25653	9.55679		Triticum aestivum cDNA, clone: SET4_O03, cultivar: Chinese Spring [AK330613]	gb|EYU23109,1| hypothetical protein MIMGU_mgv1a007540mg [Mimulus guttatus]
A_99_P386122	0.0256466	0.00666378	9.62875	3.26735	9.62875		Rep: Os09g0544900 protein - Oryza sativa subsp, japonica (Rice), partial (55%) [TC444164]	gb|EMT11761,1| Peroxisomal multifunctional enzyme type 2 [Aegilops tauschii]
A_99_P468362	0.0261569	0.00685748	9.82395	3.2963	9.82395		Rep: Chromosome chr1 scaffold_5, whole genome shotgun sequence - Vitis vinifera (Grape), partial (28%) [TC415609]	gb|EMT33157,1| hypothetical protein F775_05054 [Aegilops tauschii]
A_99_P011814	0.00880151	0.000261403	9.87753	3.30415	9.87753		Triticum aestivum clone wre1n,pk0030,h1:fis, full insert mRNA sequence [BT009575]	gb|EMT08802,1| Putative glutamate carboxypeptidase 2 [Aegilops tauschii]
A_99_P329006	0.012009	0.000579829	10.0712	3.33217	10.0712		Rep: Chromosome chr5 scaffold_2, whole genome shotgun sequence - Vitis vinifera (Grape), partial (36%) [TC461324]	ref|XP_004987270,1| PREDICTED: gibberellin 2-beta-dioxygenase 8-like [Setaria italica]
A_99_P546587	0.0117312	0.000540137	10.405	3.37921	10.405	pSBGer3	T,aestivum mRNA for germin-like protein 3 [Y09917]	emb|CAA71053,1| pSBGer4 [Triticum aestivum]
A_99_P005936	0.0271832	0.00746895	10.6121	3.40763	10.6121		BJ222628 Y, Ogihara unpublished cDNA library, Wh_dL Triticum aestivum cDNA clone whdl14m17 5', mRNA sequence [BJ222628]	gb|EMS52732,1| putative sulfate transporter 3,4 [Triticum urartu]
A_99_P000331	0.029678	0.00907795	10.6437	3.41193	10.6437		Rep: Small heat shock protein Hsp23,5 precursor - Triticum aestivum (Wheat), complete [TC400048]	gb|EMT14996,1| hypothetical protein F775_07398 [Aegilops tauschii]
A_99_P297601	0.0181639	0.00310763	10.7163	3.42173	10.7163			dbj|BAJ98523,1| predicted protein [Hordeum vulgare subsp, vulgare]
A_99_P437897	0.00880151	0.000234312	10.8315	3.43716	10.8315		Rep: Os02g0819400 protein - Oryza sativa subsp, japonica (Rice), partial (20%) [TC394743]	ref|XP_002451104,1| hypothetical protein SORBIDRAFT_05g024180 [Sorghum bicolor] gb|EES10092,1| hypothetical protein SORBIDRAFT_05g024180 [Sorghum bicolor]
A_99_P093810	0.0168988	0.00273738	11.5629	3.53143	11.5629	pSBGer3	T,aestivum mRNA for germin-like protein 3 [Y09917]	dbj|BAJ98633,1| predicted protein [Hordeum vulgare subsp, vulgare]
A_99_P464492	0.0151091	0.00160944	11.6286	3.53961	11.6286		Rep: 12-oxo-phytodienoic acid reductase - Zea mays (Maize), partial (53%) [TC413124]	gb|EEC77352,1| hypothetical protein OsI_16037 [Oryza sativa Indica Group]
A_99_P510787	0.0388906	0.0151381	11.6876	3.5469	11.6876		Rep: Chromosome chr1 scaffold_46, whole genome shotgun sequence - Vitis vinifera (Grape), partial (25%) [TC436406]	gb|EMT26027,1| hypothetical protein F775_31677 [Aegilops tauschii]
A_99_P528097	0.0275203	0.00768487	14.6774	3.87552	14.6774		FGAS010248 Triticum aestivum FGAS: Library 3 Gate 6 Triticum aestivum cDNA, mRNA sequence [CK201728]	gb|AFK29572,1| sucrose: sucrose-1-fructosyltransferase [Secale cereale]
A_99_P165277	0.0135537	0.00115053	15.1423	3.92052	15.1423		Rep: Oxalate oxidase 2 precursor - Hordeum vulgare (Barley), complete [TC378956]	emb|CAA71051,1| pSBGer2 [Triticum aestivum]
A_99_P244541	0.00880151	0.000259062	16.1928	4.01728	16.1928		Rep: Endonuclease - Hordeum vulgare (Barley), complete [TC392981]	dbj|BAA28942,1| endonuclease [Hordeum vulgare subsp, vulgare]
A_99_P188177	0.0331309	0.0114301	17.0529	4.09195	17.0529	1-FFT-B	Triticum aestivum 1-FFT-B mRNA for fructan:fructan 1-fructosyltransferase, complete cds [AB088410]	gb|EMS52931,1| 6(G)-fructosyltransferase [Triticum urartu]
A_99_P417967	0.0127836	0.000955136	17.2645	4.10973	17.2645		Rep: Oxalate oxidase 2 precursor - Hordeum vulgare (Barley), complete [TC378956]	gb|EMT19969,1| hypothetical protein F775_43214 [Aegilops tauschii]
A_99_P532422	0.0154903	0.00177097	17.7888	4.1529	17.7888		FGAS081203 Triticum aestivum FGAS: Library 3 Gate 6 Triticum aestivum cDNA, mRNA sequence [DR735533]	gb|EMS59682,1| hypothetical protein TRIUR3_05528 [Triticum urartu]
A_99_P413587	0.0343522	0.0123203	18.3442	4.19726	18.3442		Rep: Fructan:fructan 1-fructosyltransferase - Triticum aestivum (Wheat), partial (38%) [TC375356]	gb|ACH73190,1| fructan:fructan 1-fructosyltransferase [Triticum turgidum subsp, durum]
A_99_P234306	0.0344633	0.0125373	19.4513	4.2818	19.4513			gb|AAS49905,2| putative proteinase inhibitor-related protein [Triticum aestivum] gb|ABY49937,1| putative Bowman-Birk type wound-induced protease inhibitor [Triticum dicoccoides] gb|ABY49938,1| putative Bowman-Birk type wound-induced protease inhibitor [Triticum dicoccoides] gb|EMS51096,1| hypothetical protein TRIUR3_06538 [Triticum urartu]
A_99_P086245	0.0309593	0.00984568	19.4604	4.28247	19.4604	1-FFT-A	Triticum aestivum 1-FFT-A mRNA for fructan:fructan 1-fructosyltransferase, complete cds [AB088409]	gb|EMS61371,1| Acid beta-fructofuranosidase [Triticum urartu]
A_99_P225431	0.0134799	0.0011004	19.6824	4.29884	19.6824		Rep: Oxalate oxidase GF-2,8 precursor - Triticum aestivum (Wheat), partial (92%) [TC376697]	ref|XP_006593704,1| PREDICTED: floral homeotic protein APETALA 1-like [Glycine max]
A_99_P236411	0.048568	0.0218061	19.8634	4.31204	19.8634			gb|AAA50850,1| wali5 [Triticum aestivum]
A_99_P347256	0.0154903	0.00192892	20.0964	4.32886	20.0964			dbj|BAJ87317,1| predicted protein [Hordeum vulgare subsp, vulgare]
A_99_P517257	0.0128526	0.0010108	20.2244	4.33802	20.2244			gb|EMT31223,1| Protein kinase and PP2C-like domain-containing protein [Aegilops tauschii]
A_99_P234356	0.0370892	0.0141467	20.392	4.34993	20.392			gb|AAS49905,2| putative proteinase inhibitor-related protein [Triticum aestivum] gb|ABY49937,1| putative Bowman-Birk type wound-induced protease inhibitor [Triticum dicoccoides] gb|ABY49938,1| putative Bowman-Birk type wound-induced protease inhibitor [Triticum dicoccoides] gb|EMS51096,1| hypothetical protein TRIUR3_06538 [Triticum urartu]
A_99_P200731	0.0135911	0.00118389	21.4745	4.42455	21.4745		Rep: Chemocyanin precursor - Lilium longiflorum (Trumpet lily), partial (85%) [TC406519]	gb|ADP02231,1| Cu_bind_like domain-containing protein [Aegilops tauschii] gb|EMT13062,1| Chemocyanin [Aegilops tauschii]
A_99_P229621	0.0150951	0.00148496	22.3619	4.48297	22.3619		Rep: Predicted protein - Ajellomyces capsulata (strain NAm1) (Histoplasma capsulatum), partial (6%) [TC386023]	N/A
A_99_P413662	0.00523595	1.13955e-05	22.6685	4.50261	22.6685		Rep: Chromosome chr8 scaffold_88, whole genome shotgun sequence - Vitis vinifera (Grape), partial (57%) [TC385526]	gb|EMT26999,1| Alanine--glyoxylate aminotransferase-2-like protein, mitochondrial [Aegilops tauschii]
A_99_P198216	0.0159307	0.00218665	22.7641	4.50869	22.7641	1-SST	Triticum aestivum cDNA, clone: WT005_F18, cultivar: Chinese Spring [AK332983]	N/A
A_99_P236421	0.0483792	0.0215775	22.9997	4.52354	22.9997		Rep: Wali5 protein - Triticum aestivum (Wheat), complete [TC398551]	ref|XP_002519746,1| conserved hypothetical protein [Ricinus communis] gb|EEF42719,1| conserved hypothetical protein [Ricinus communis]
A_99_P165052	0.0154903	0.00186772	23.5376	4.5569	23.5376	LOC543498	Triticum aestivum germin protein precursor, mRNA, complete cds [M21962]	sp|P15290,1|GER2_WHEAT RecName: Full=Oxalate oxidase GF-2,8; AltName: Full=Germin GF-2,8; Flags: Precursor gb|AAA34268,1| germin protein precursor [Triticum aestivum] gb|AAA34270,1| germin [Triticum aestivum]
A_99_P547117	0.017709	0.00296179	25.2118	4.65603	25.2118		CJ854030 Y, Ogihara unpublished cDNA library, whsctal Triticum aestivum cDNA clone whsctal2o09 5', mRNA sequence [CJ854030]	gb|EMT16665,1| Putative UDP-glucosyltransferase [Aegilops tauschii]
A_99_P236461	0.0488248	0.0219699	26.117	4.70692	26.117			gb|AAA50850,1| wali5 [Triticum aestivum]
A_99_P199001	0.0164557	0.00239996	26.4917	4.72747	26.4917	1-SST	Triticum aestivum cDNA, clone: WT005_F18, cultivar: Chinese Spring [AK332983]	gb|EMS55535,1| Beta-fructofuranosidase 1 [Triticum urartu]
A_99_P393122	0.0207145	0.00409341	26.7708	4.74259	26.7708		Rep: Glutathione-S-transferase Cla47 - Triticum aestivum (Wheat), partial (96%) [TC412532]	N/A
A_99_P288411	0.0252591	0.00647076	27.8774	4.80102	27.8774		Rep: Eukaryotic peptide chain release factor subunit 1-3-like - Solanum tuberosum (Potato), partial (12%) [TC401495]	ref|XP_004290750,1| PREDICTED: pentatricopeptide repeat-containing protein At4g35130, chloroplastic-like [Fragaria vesca subsp, vesca]
A_99_P205151	0.0176049	0.00290932	28.0491	4.80988	28.0491	1-SST	Triticum aestivum cDNA, clone: WT005_F18, cultivar: Chinese Spring [AK332983]	gb|ACL13556,1| sucrose:sucrose 1-fructosyltransferase [Triticum urartu]
A_99_P139740	0.0166121	0.00259131	30.3817	4.92513	30.3817	1-SST	Triticum aestivum cDNA, clone: WT005_F18, cultivar: Chinese Spring [AK332983]	gb|ACL13556,1| sucrose:sucrose 1-fructosyltransferase [Triticum urartu]
A_99_P507512	0.0154903	0.00202741	31.1043	4.95904	31.1043		Rep: Ripening-related protein 3 precursor - Oryza sativa subsp, japonica (Rice), partial (33%) [TC434784]	gb|EMT07312,1| hypothetical protein F775_16823 [Aegilops tauschii]
A_99_P197481	0.0107156	0.000397885	32.3852	5.01726	32.3852		Rep: Basic blue copper protein - Cicer arietinum (Chickpea) (Garbanzo), partial (50%) [TC433879]	N/A
A_99_P641396	0.0126712	0.000789076	32.9595	5.04262	32.9595	NAC69-3	Triticum aestivum NAC domain transcription factor (NAC69-3) mRNA, complete cds [DQ022843]	gb|EMS64642,1| hypothetical protein TRIUR3_15051 [Triticum urartu]
A_99_P287646	0.0332713	0.0115266	34.7988	5.12097	34.7988		TSA: Triticum aestivum cultivar Bobwhite isotig27175,flagleaf mRNA sequence [HP636380]	gb|EMT30204,1| Caffeic acid 3-O-methyltransferase [Aegilops tauschii]
A_99_P244506	0.0137036	0.0012187	36.9388	5.20707	36.9388		Rep: Endonuclease - Hordeum vulgare (Barley), partial (66%) [TC376365]	ref|XP_006386258,1| hypothetical protein POPTR_0002s04930g [Populus trichocarpa] ref|XP_002302095,2| hypothetical protein POPTR_0002s04930g [Populus trichocarpa] gb|ERP64055,1| hypothetical protein POPTR_0002s04930g [Populus trichocarpa] gb|EEE81368,2| hypothetical protein POPTR_0002s04930g [Populus trichocarpa]
A_99_P025909	0.0150284	0.00145123	37.4195	5.22572	37.4195	DFR	Triticum aestivum dihydroflavonol 4-reductase 1 mRNA, complete cds [AY707916]	dbj|BAD11019,1| dihydroflavonol-4-reductase [Triticum aestivum]
A_99_P056351	0.0127836	0.000950804	37.6792	5.2357	37.6792	taxi-I	Triticum aestivum taxi-I mRNA for xylanase inhibitor TAXI-I, complete cds [AB114626]	pdb|2B42|A Chain A, Crystal Structure Of The Triticum Xylanse Inhibitor-I In Complex With Bacillus Subtilis Xylanase
A_99_P503042	0.0208849	0.00416867	43.1683	5.4319	43.1683	1-FFT-B	Triticum aestivum 1-FFT-B mRNA for fructan:fructan 1-fructosyltransferase, complete cds [AB088410]	gb|EMS52931,1| 6(G)-fructosyltransferase [Triticum urartu]
A_99_P355871	0.00523595	2.06007e-05	43.7896	5.45252	43.7896		Rep: Expressed protein - Oryza sativa subsp, japonica (Rice), partial (57%) [TC405377]	gb|ABB77434,1| S-RNase-binding protein [Petunia integrifolia subsp, inflata]
A_99_P076280	0.00952029	0.000323402	72.2721	6.17537	72.2721		FGAS083553 Triticum aestivum FGAS: Library 6 CAP GATE 1 Triticum aestivum cDNA, mRNA sequence [DR738336]	dbj|BAJ98765,1| predicted protein [Hordeum vulgare subsp, vulgare]
A_99_P199036	0.00910672	0.000299175	109.628	6.77647	109.628		Triticum aestivum clone wdk1c,pk014,c11:fis, full insert mRNA sequence [BT008969]	ref|XP_003546810,1| PREDICTED: thiosulfate/3-mercaptopyruvate sulfurtransferase 1, mitochondrial-like [Glycine max]
A_99_P560262	0.00880151	0.000252507	111.591	6.80208	111.591			gb|EMT09010,1| 6(G)-fructosyltransferase [Aegilops tauschii]
A_99_P133905	0.00880151	0.000222822	113.573	6.82747	113.573	6-SFT	Triticum aestivum 6-SFT mRNA for sucrose:fructan 6-fructosyltransferase, complete cds [AB029887]	pir||JC7905 fructan 6-fructosyltransferase - wheat
A_99_P526832	0.00880151	0.000197857	163.634	7.35433	163.634		Rep: Cytochrome P450 - Triticum monococcum subsp, aegilopoides, partial (14%) [TC442914]	ref|XP_006284996,1| hypothetical protein CARUB_v10006303mg [Capsella rubella] gb|EOA17894,1| hypothetical protein CARUB_v10006303mg [Capsella rubella]
A_99_P353956	0.0124036	0.000687397	1182.55	10.2077	1182.55	LOC100192198	Triticum aestivum flavanone 3-dioxygenase mRNA, complete cds [EU977177]	gb|ACJ06501,1| flavanone 3-hydroxylase [Secale cereale]
A_99_P105360	0.0123357	0.000649269	1331.04	10.3783	1331.04	LOC100192198	Triticum aestivum flavanone 3-dioxygenase mRNA, complete cds [EU977177]	dbj|BAH36892,1| flavanone 3-hydroxylase [Triticum aestivum]
